# Supplementary material for: Mild and efficient synthesis oftrans-3-aryl-2-nitro-2,3-dihydrobenzofurans on water
Source: Royal Society of Chemistry journal article supplement (doi:10.1039/d0nj00548g), 2020-01-01
Supplement: d0nj00548g1.pdf [file d0nj00548g1.pdf]

## Mild and efficient synthesis of *trans*-3-aryl-2-nitro-2,3-dihydrobenzofurans on water

Juhua Feng,<sup>a, b, \*</sup> Siyuan Wang,<sup>a, b</sup> Jinxiang Feng,<sup>a</sup> Qiuju Li,<sup>a</sup> Junping Yue,<sup>a</sup> Guizhou Yue,<sup>a</sup> Ping Zou,<sup>a</sup> Guangtu Wang<sup>a</sup>

<sup>a</sup> College of Science, Sichuan Agricultural University, Ya'an, Sichuan, 625014 (P. R. China).

E-mail: jhfeng@sicau.edu.cn

<sup>b</sup> These authors contributed equally to this work.

### Supporting Information

|                                                                                                                           |     |
|---------------------------------------------------------------------------------------------------------------------------|-----|
| 1. General.....                                                                                                           | S2  |
| 2. General procedure for the preparation of products.....                                                                 | S2  |
| 3. Extra condition optimizations for the domino Friedel-Crafts/substitution reaction.....                                 | S2  |
| 4. Substrate scope for the reaction of ( <i>Z</i> )-bromonitrostyrenes <b>1</b> with phenols and naphthols <b>2</b> ..... | S4  |
| 5. Characterization of the products.....                                                                                  | S4  |
| 6. Copies of <sup>1</sup> H NMR, <sup>13</sup> C NMR and <sup>19</sup> F NMR spectra for the products.....                | S16 |
| 7. Synthetic Transformations.....                                                                                         | S49 |
| 8. Synthetic Approach.....                                                                                                | S50 |
| 9. Reference.....                                                                                                         | S50 |

## 1. General

<sup>1</sup>H NMR spectra were recorded on commercial instruments (400 MHz). The chemical shifts were recorded in ppm relative to tetramethylsilane and with the solvent resonance as the internal standard. Data were reported as follows: chemical shift, multiplicity (s = singlet, d = doublet, t = triplet, m = multiplet, br = broad), coupling constants (Hz) and integration. <sup>13</sup>C NMR data were collected at 101 MHz with complete proton decoupling. Chemical shifts were reported in ppm from the tetramethylsilane with the solvent resonance as internal standard. IR spectra were obtained using a FT-IR spectrometer. ESI-HRMS was recorded on a commercial apparatus (ESI Source, TOF). Flash chromatography was performed with silica gel.

## 2. General procedure for the preparation of products

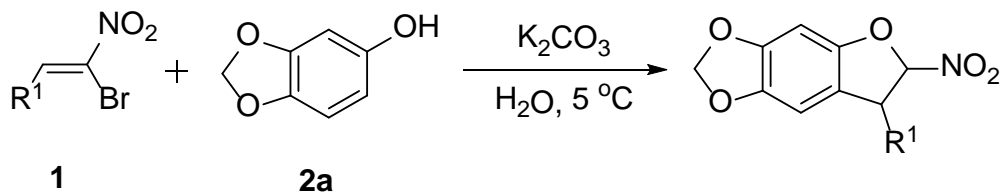

**Scheme 1.** The Friedel-Crafts/substitution reaction between (Z)-bromonitrostyrenes and sesamol

In a test tube, H<sub>2</sub>O (1.0 mL) was added to the mixture of (Z)-bromonitrostyrene<sup>[1]</sup> **1** (0.10 mmol), sesamol **2a** (0.10 mmol) and the base (K<sub>2</sub>CO<sub>3</sub> or NaOH, 0.10 mmol) at 5 °C. The mixture was stirred for 48-72 hours. After simple filtration, washing with water and drying in oven at 45 °C for 12 hours, the corresponding products were obtained.

## 3. Extra condition optimizations for the domino Friedel-Crafts/substitution reaction

Table 1. Other reaction conditions for the domino Friedel-Crafts/substitution reaction

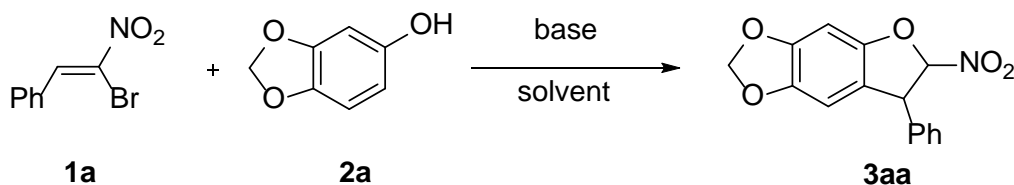

| Entry <sup>[a]</sup> | Solvent                         | Base                            | Base (equiv.) | T [°C] | Yield [%]   |
|----------------------|---------------------------------|---------------------------------|---------------|--------|-------------|
| 1 <sup>[b]</sup>     | CH <sub>2</sub> Cl <sub>2</sub> | none                            | 0             | 25     | trace       |
| 2 <sup>[b]</sup>     | CH <sub>2</sub> Cl <sub>2</sub> | NaHCO <sub>3</sub>              | 0.2           | 25     | trace       |
| 3 <sup>[b]</sup>     | CH <sub>2</sub> Cl <sub>2</sub> | NaOH                            | 0.2           | 25     | trace       |
| 4 <sup>[b]</sup>     | CH <sub>2</sub> Cl <sub>2</sub> | K <sub>2</sub> CO <sub>3</sub>  | 0.2           | 25     | 27          |
| 5 <sup>[b]</sup>     | CH <sub>2</sub> Cl <sub>2</sub> | triethylamine                   | 0.2           | 25     | 29          |
| 6 <sup>[b]</sup>     | CH <sub>2</sub> Cl <sub>2</sub> | pyridine                        | 0.2           | 25     | no reaction |
| 7 <sup>[b]</sup>     | CH <sub>2</sub> Cl <sub>2</sub> | N-ethyl-diisopropylamine        | 0.5           | 25     | 39          |
| 8 <sup>[b]</sup>     | CH <sub>2</sub> Cl <sub>2</sub> | DMAP                            | 0.5           | 25     | no reaction |
| 9 <sup>[b]</sup>     | CH <sub>2</sub> Cl <sub>2</sub> | piperidine                      | 0.5           | 25     | no reaction |
| 10 <sup>[b]</sup>    | CH <sub>2</sub> Cl <sub>2</sub> | Ag <sub>2</sub> CO <sub>3</sub> | 0.5           | 25     | no reaction |

|                      |                                 |                                                   |     |    |             |
|----------------------|---------------------------------|---------------------------------------------------|-----|----|-------------|
| 11 <sup>[b]</sup>    | CH <sub>2</sub> Cl <sub>2</sub> | (NH <sub>4</sub> ) <sub>2</sub> CO <sub>3</sub>   | 0.5 | 25 | no reaction |
| 12 <sup>[b]</sup>    | CH <sub>2</sub> Cl <sub>2</sub> | DBU                                               | 0.5 | 25 | 47          |
| 13 <sup>[b]</sup>    | CH <sub>2</sub> Cl <sub>2</sub> | K <sub>2</sub> HPO <sub>4</sub>                   | 0.5 | 25 | 55          |
| 14 <sup>[b]</sup>    | CH <sub>2</sub> Cl <sub>2</sub> | K <sub>3</sub> PO <sub>4</sub> ·7H <sub>2</sub> O | 0.5 | 25 | 74          |
| 15 <sup>[b]</sup>    | CH <sub>2</sub> Cl <sub>2</sub> | N-ethyl-diisopropylamine                          | 0.5 | 0  | 77          |
| 16 <sup>[b]</sup>    | CH <sub>2</sub> Cl <sub>2</sub> | DBU                                               | 0.5 | 0  | 32          |
| 17 <sup>[b]</sup>    | CH <sub>2</sub> Cl <sub>2</sub> | triethylamine                                     | 0.5 | 0  | 54          |
| 18 <sup>[b]</sup>    | CH <sub>2</sub> Cl <sub>2</sub> | K <sub>2</sub> CO <sub>3</sub>                    | 0.5 | 0  | 77          |
| 19 <sup>[b]</sup>    | CH <sub>2</sub> Cl <sub>2</sub> | K <sub>3</sub> PO <sub>4</sub> ·7H <sub>2</sub> O | 0.5 | 0  | 31          |
| 20 <sup>[b]</sup>    | CH <sub>2</sub> Cl <sub>2</sub> | K <sub>3</sub> PO <sub>4</sub>                    | 0.5 | 0  | 58          |
| 21 <sup>[b]</sup>    | CH <sub>2</sub> Cl <sub>2</sub> | K <sub>2</sub> HPO <sub>4</sub>                   | 0.5 | 0  | no reaction |
| 22 <sup>[b]</sup>    | CHCl <sub>3</sub>               | K <sub>2</sub> CO <sub>3</sub>                    | 0.5 | 0  | 60          |
| 23 <sup>[b]</sup>    | THF                             | K <sub>2</sub> CO <sub>3</sub>                    | 0.5 | 0  | 35          |
| 24 <sup>[b]</sup>    | MeOH                            | K <sub>2</sub> CO <sub>3</sub>                    | 0.5 | 0  | 48          |
| 25 <sup>[b]</sup>    | CH <sub>2</sub> Cl <sub>2</sub> | K <sub>2</sub> CO <sub>3</sub>                    | 0.7 | 0  | 81          |
| 26 <sup>[b]</sup>    | MTBE                            | K <sub>2</sub> CO <sub>3</sub>                    | 0.7 | 0  | 89          |
| 27 <sup>[b]</sup>    | toluene                         | K <sub>2</sub> CO <sub>3</sub>                    | 0.7 | 0  | 24          |
| 28 <sup>[b]</sup>    | MeOH                            | K <sub>2</sub> CO <sub>3</sub>                    | 0.7 | 0  | 45          |
| 29 <sup>[b]</sup>    | anhydrous diethyl ether         | K <sub>2</sub> CO <sub>3</sub>                    | 0.7 | 0  | 38          |
| 30 <sup>[b]</sup>    | CHCl <sub>3</sub>               | K <sub>2</sub> CO <sub>3</sub>                    | 0.7 | 0  | 73          |
| 31 <sup>[b]</sup>    | THF                             | K <sub>2</sub> CO <sub>3</sub>                    | 0.7 | 0  | 41          |
| 32 <sup>[c]</sup>    | H <sub>2</sub> O                | K <sub>2</sub> CO <sub>3</sub>                    | 0.7 | 5  | 89          |
| 33 <sup>[c][d]</sup> | H <sub>2</sub> O                | K <sub>2</sub> CO <sub>3</sub>                    | 1.0 | 5  | 99          |
| 34 <sup>[d]</sup>    | glycerol                        | K <sub>2</sub> CO <sub>3</sub>                    | 1.0 | 25 | 61          |

<sup>[a]</sup> Unless otherwise noted, the reaction was carried out with **1a** (0.10 mmol), **2a** (0.10 mmol) and base in solvent (1.0 mL) at the indicated temperature for 48 h. <sup>[b]</sup> The products were isolated by silica column chromatography, petroleum ether/ethyl acetate = 30/1. <sup>[c]</sup> The temperature is 5 °C to avoid water freezing. <sup>[d]</sup> The products were obtained by filtration, washing with water and drying in oven at 45 °C for 12 hours. DMAP = 4-dimethylaminopyridine, DBU = 1,8-diazabicyclo[5.4.0]undec-7-ene, THF = tetrahydrofuran, MTBE = methyl tert-butyl ether.

#### 4 Substrate scope for the reaction of (Z)-bromonitrostyrenes **1** with phenols and naphthols **2**

The reaction of (Z)-bromonitrostyrenes **1** with phenols and naphthols **2** was tested. As shown in Scheme 2, the reaction was carried out with **1** (0.10 mmol), **2** (0.10 mmol) and K<sub>2</sub>CO<sub>3</sub> (0.10 mmol) on H<sub>2</sub>O (1.0 mL) at 5 °C for 72 hours. The pure products were obtained by filtration, washing with water and drying in oven.

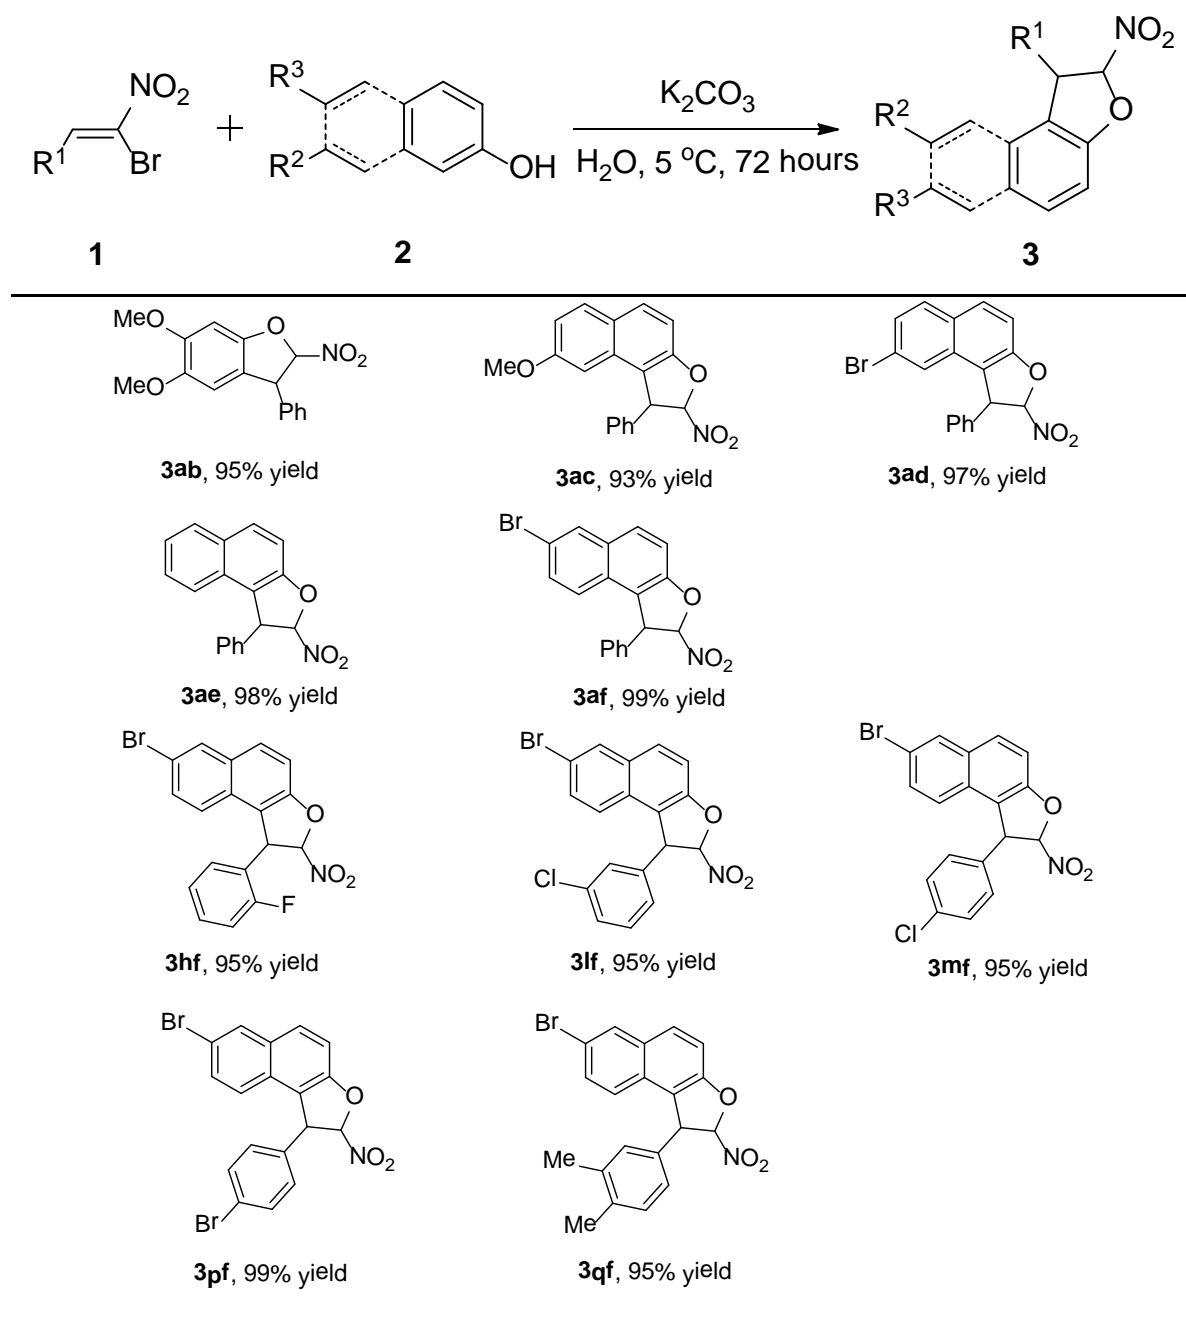

**Scheme 2.** Substrate scope for the reaction between (Z)-bromonitrostyrenes and phenols or naphthols

#### 5. Characterization of the products

##### 6-nitro-7-phenyl-6,7-dihydro-[1,3]dioxolo[4,5-f]benzofuran **3aa**

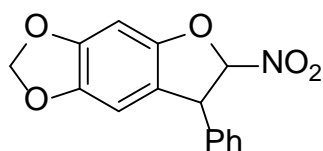

**3aa**

Prepared according to **general procedure**. Light yellow solid, 99% yield. m.p. 101.7-102.4 °C. IR (thin film):  $\nu_{\max}$  = 3029, 2900, 1565, 1496, 1470, 1370, 1290, 1042, 752, 696  $\text{cm}^{-1}$ .  $^1\text{H}$  NMR (400 MHz,  $\text{CDCl}_3$ )  $\delta$  = 7.44 – 7.28 (m, 3H), 7.21 – 7.11 (m, 2H), 6.73 (s, 1H), 6.57 (s, 1H), 6.07 – 5.90 (m, 3H), 4.83 (br, 1H).  $^{13}\text{C}$  NMR (101 MHz,  $\text{CDCl}_3$ )  $\delta$  = 152.73, 148.89, 144.27, 138.85, 129.32, 128.41, 127.35, 117.26, 112.61, 104.84, 101.96, 94.08, 55.55. MS (ESI<sup>+</sup>): calcd. for  $\text{C}_{15}\text{H}_{11}\text{O}_3$ :  $[\text{M}-\text{NO}_2]^+$ : 239.0703, found 239.0699.

**7-(2-methoxyphenyl)-6-nitro-6,7-dihydro-[1,3]dioxolo[4,5-f]benzofuran 3ba:**

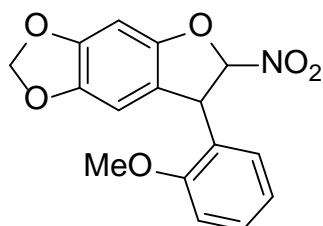

**3ba**

Prepared according to **general procedure**. Light yellow solid, 99% yield. m.p. 82.5-83.3 °C. IR (thin film):  $\nu_{\max}$  = 3020, 2973, 2930, 2840, 1564, 1490, 1460, 1370, 1250, 1049, 838  $\text{cm}^{-1}$ .  $^1\text{H}$  NMR ( $\text{CDCl}_3$ , 400 MHz):  $\delta$  = 7.35 – 7.18 (m, 1H), 6.99 – 6.74 (m, 3H), 6.68 (s, 1H), 6.61 (s, 1H), 6.07 – 5.82 (m, 3H), 5.18 (br, 1H), 3.91 (s, 3H).  $^{13}\text{C}$  NMR (101 MHz,  $\text{CDCl}_3$ )  $\delta$  = 156.72, 153.08, 148.59, 143.92, 129.55, 127.94, 126.78, 120.81, 116.86, 112.72, 110.70, 105.11, 101.84, 93.97, 55.51, 49.28. MS (ESI<sup>+</sup>): calcd. for  $\text{C}_{16}\text{H}_{13}\text{O}_4$ :  $[\text{M}-\text{NO}_2]^+$ : 269.0808, found 269.0804.

**7-(3-methoxyphenyl)-6-nitro-6,7-dihydro-[1,3]dioxolo[4,5-f]benzofuran 3ca**

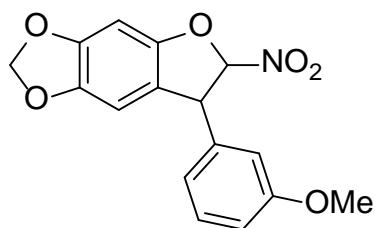

**3ca**

Prepared according to **general procedure**. Light yellow solid, 90% yield. m.p. 111.6-112.0 °C. IR (thin film):  $\nu_{\max}$  = 3050, 2960, 2893, 2835, 1573, 1488, 1460, 1365, 1254, 760, 702  $\text{cm}^{-1}$ .  $^1\text{H}$  NMR (400 MHz,  $\text{CDCl}_3$ )  $\delta$  = 7.35 – 7.21 (m, 1H), 6.89 – 6.81 (m, 1H), 6.78 – 6.70 (m, 2H), 6.69 – 6.65 (m, 1H), 6.57 (s, 1H), 6.07 – 5.87 (m, 3H), 4.79 (br, 1H), 3.79 (s, 3H).  $^{13}\text{C}$  NMR (101 MHz,  $\text{CDCl}_3$ )  $\delta$  = 160.22, 152.72, 148.90, 144.25, 140.35, 130.41, 119.55, 117.06, 113.35, 113.31, 112.53, 104.84, 101.96, 94.08, 55.47, 55.34. MS (ESI<sup>+</sup>): calcd. for  $\text{C}_{16}\text{H}_{13}\text{O}_4$ :  $[\text{M}-\text{NO}_2]^+$ : 269.0808, found 269.0812.

**7-(4-methoxyphenyl)-6-nitro-6,7-dihydro-[1,3]dioxolo[4,5-f]benzofuran 3da**

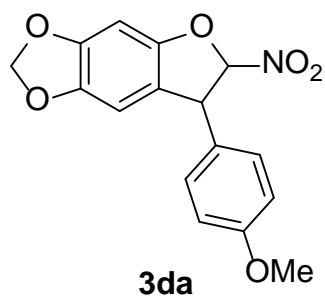

Prepared according to **general procedure**. Light yellow solid, 98% yield. m.p. 107.6-108.2 °C. IR (thin film):  $\nu_{\max}$  = 3025, 2920, 1582, 1493, 1466, 1240, 1030, 852  $\text{cm}^{-1}$ .  $^1\text{H}$  NMR (400 MHz,  $\text{CDCl}_3$ )  $\delta$  7.06 (d,  $J$  = 8.6 Hz, 2H), 6.87 (d,  $J$  = 8.7 Hz, 2H), 6.71 (s, 1H), 6.55 (s, 1H), 6.02 – 5.93 (m, 2H), 5.91 (d,  $J$  = 1.5 Hz, 1H), 4.77 (br, 1H), 3.80 (s, 3H).  $^{13}\text{C}$  NMR (101 MHz,  $\text{CDCl}_3$ )  $\delta$  159.61, 152.64, 148.80, 144.24, 130.93, 128.49, 117.57, 114.62, 112.86, 104.78, 101.91, 94.01, 55.38, 54.96. MS (ESI<sup>+</sup>): calcd. for  $\text{C}_{16}\text{H}_{13}\text{O}_4$ :  $[\text{M}-\text{NO}_2]^+$ : 269.0808, found 269.0803.

**6-nitro-7-(o-tolyl)-6,7-dihydro-[1,3]dioxolo[4,5-f]benzofuran 3ea**

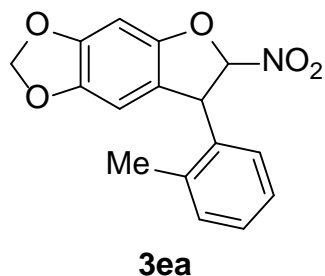

Prepared according to **general procedure**. Light yellow solid, 90% yield. m.p. 133.8-134.6 °C. IR (thin film):  $\nu_{\max}$  = 3025, 2953, 2853, 1570, 1502, 1460, 1294, 1232, 1038, 753  $\text{cm}^{-1}$ .  $^1\text{H}$  NMR (400 MHz,  $\text{CDCl}_3$ )  $\delta$  = 7.32 – 7.17 (m, 2H), 7.15 – 7.04 (m, 1H), 6.74 (s, 1H), 6.69 – 6.59 (m, 1H), 6.54 (s, 1H), 5.99 (dd,  $J$  = 5.3, 1.2, 2H), 5.88 (d,  $J$  = 1.4, 1H), 5.05 (br, 1H), 2.58 (s, 3H).  $^{13}\text{C}$  NMR (101 MHz,  $\text{CDCl}_3$ )  $\delta$  = 152.99, 148.82, 144.36, 136.92, 136.03, 131.07, 128.26, 127.36, 126.83, 117.60, 112.36, 104.77, 101.95, 94.06, 51.91, 19.96. MS (ESI<sup>+</sup>): calcd. for  $\text{C}_{16}\text{H}_{13}\text{O}_3$ :  $[\text{M}-\text{NO}_2]^+$ : 253.0859, found 253.0854.

**6-nitro-7-(m-tolyl)-6,7-dihydro-[1,3]dioxolo[4,5-f]benzofuran 3fa**

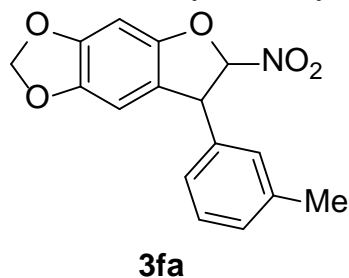

Prepared according to **general procedure**. Light yellow solid, 88% yield, m.p. 97.6-98.6 °C. IR (thin film):  $\nu_{\max}$  = 3013, 2951, 2902, 1565, 1501, 1480, 1460, 1375, 1297, 1246, 1036, 770, 697  $\text{cm}^{-1}$ .  $^1\text{H}$  NMR (400 MHz,  $\text{CDCl}_3$ )  $\delta$  = 7.30 – 7.20 (m, 1H), 7.18 – 7.07 (m, 1H), 6.99 – 6.87 (m, 2H), 6.73 (s, 1H), 6.56 (s, 1H), 6.05 – 5.88 (m, 3H), 4.78 (br, 1H), 2.34 (s, 3H).  $^{13}\text{C}$  NMR (101 MHz,  $\text{CDCl}_3$ )  $\delta$  = 152.69, 148.82, 144.23, 139.19, 138.80, 129.18, 129.14, 127.94, 124.35, 117.39, 112.71, 104.84, 101.92, 94.06, 55.54, 21.40. MS (ESI<sup>+</sup>): calcd. for  $\text{C}_{16}\text{H}_{13}\text{O}_3$ :  $[\text{M}-\text{NO}_2]^+$ : 253.0859, found 253.0855.

**6-nitro-7-(p-tolyl)-6,7-dihydro-[1,3]dioxolo[4,5-f]benzofuran 3ga**

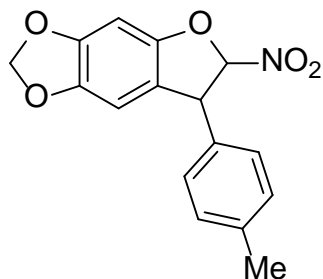

**3ga**

Prepared according to **general procedure**. Light yellow solid, 98% yield, m.p. 80.0-81.0 °C. IR (thin film):  $\nu_{\max}$  = 3024, 2922, 2860, 1573, 1487, 1460, 1373, 1303, 1235, 1041, 824  $\text{cm}^{-1}$ .  $^1\text{H}$  NMR (400 MHz,  $\text{CDCl}_3$ )  $\delta$  = 7.17 (d,  $J$  = 7.9, 2H), 7.04 (d,  $J$  = 8.0, 2H), 6.72 (s, 1H), 6.56 (s, 1H), 6.07 – 5.83 (m, 3H), 4.79 (br, 1H), 2.35 (s, 3H).  $^{13}\text{C}$  NMR (101 MHz,  $\text{CDCl}_3$ )  $\delta$  = 152.67, 148.80, 144.23, 138.27, 135.92, 129.95, 127.21, 117.48, 112.79, 104.81, 101.92, 94.04, 55.27, 21.09. MS (ESI<sup>+</sup>): calcd. for  $\text{C}_{16}\text{H}_{13}\text{O}_3$ :  $[\text{M}-\text{NO}_2]^+$ : 253.0859, found 253.0855.

**7-(2-fluorophenyl)-6-nitro-6,7-dihydro-[1,3]dioxolo[4,5-f]benzofuran 3ha**

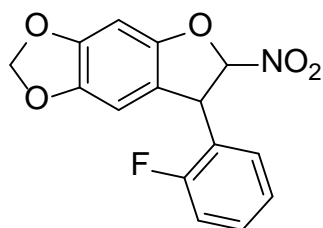

**3ha**

Prepared according to **general procedure**. Light yellow solid, 95% yield, m.p. 97.1-97.8 °C, IR (thin film):  $\nu_{\max}$  = 3023, 2863, 1570, 1495, 1290, 1457, 1236, 1032, 751  $\text{cm}^{-1}$ .  $^1\text{H}$  NMR (400 MHz,  $\text{CDCl}_3$ )  $\delta$  = 7.40 – 7.27 (m, 1H), 7.19 – 7.03 (m, 2H), 6.94 – 6.81 (m, 1H), 6.72 (s, 1H), 6.58 (s, 1H), 6.09 – 5.92 (m, 3H), 5.15 (br, 1H).  $^{13}\text{C}$  NMR (101 MHz,  $\text{CDCl}_3$ )  $\delta$  = 160.14 ( $J$  = 249.17 Hz), 152.78, 149.03, 144.31, 130.21 ( $J$  = 8.24 Hz), 128.64 ( $J$  = 3.28 Hz), 125.79 ( $J$  = 14.14 Hz), 124.85 ( $J$  = 3.72 Hz), 116.16 ( $J$  = 4.48 Hz), 115.92, 111.67, 104.71, 102.00, 94.17, 48.53.  $^{19}\text{F}$  NMR (376 MHz,  $\text{CDCl}_3$ ):  $\delta$  = -117.13 (s, 1F). MS (ESI<sup>+</sup>): calcd. for  $\text{C}_{15}\text{H}_{10}\text{FO}_3$ :  $[\text{M}-\text{NO}_2]^+$ : 257.0608, found 257.0605.

**7-(3-fluorophenyl)-6-nitro-6,7-dihydro-[1,3]dioxolo[4,5-f]benzofuran 3ia**

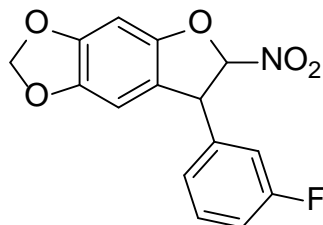

**3ia**

Prepared according to **general procedure**. White solid, 95% yield. m.p. 127.8-128.2 °C. IR (thin film):  $\nu_{\max}$  = 3046, 2917, 1593, 1520, 1460, 1294, 1242, 1045, 795, 688  $\text{cm}^{-1}$ .  $^1\text{H}$  NMR (400 MHz,  $\text{CDCl}_3$ )  $\delta$  = 7.39 – 7.31 (m, 1H),

7.07 – 6.97 (m, 2H), 6.86 – 6.80 (m, 1H), 6.73 (s, 1H), 6.57 (s, 1H), 5.99 (dd,  $J = 5.2, 1.3$ , 2H), 5.94 (d,  $J = 1.7$ , 1H), 4.83 (br, 1H).  $^{13}\text{C}$  NMR (101 MHz,  $\text{CDCl}_3$ )  $\delta = 163.23$  ( $J = 249.05$  Hz), 152.79, 149.15, 144.42, 141.16 ( $J = 6.95$  Hz), 130.97 ( $J = 8.33$  Hz), 123.13 ( $J = 2.99$  Hz), 116.46, 115.48 ( $J = 21.25$  Hz), 114.43 ( $J = 22.46$  Hz), 112.18, 104.71, 102.05, 94.21, 55.09.  $^{19}\text{F}$  NMR (376 MHz,  $\text{CDCl}_3$ ):  $\delta = -111.26$  (s, 1F). MS (ESI $^+$ ): calcd. for  $\text{C}_{15}\text{H}_{10}\text{FO}_3$ :  $[\text{M}-\text{NO}_2]^+$ : 257.0608, found 257.0605.

#### 7-(4-fluorophenyl)-6-nitro-6,7-dihydro-[1,3]dioxolo[4,5-f]benzofuran 3ja

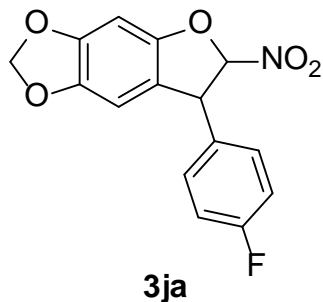

Prepared according to **general procedure**. Light yellow solid, 98% yield, m.p. 148.6-149.5 °C. IR (thin film):  $\nu_{\text{max}} = 3013, 2920, 1564, 1479, 1452, 1293, 1237, 1040, 834$   $\text{cm}^{-1}$ .  $^1\text{H}$  NMR (400 MHz,  $\text{CDCl}_3$ )  $\delta = 7.19 - 6.96$  (m, 4H), 6.73 (s, 1H), 6.55 (s, 1H), 5.98 (dd,  $J = 5.2, 1.1$ , 2H), 5.91 (d,  $J = 1.6$ , 1H), 4.82 (br, 1H).  $^{13}\text{C}$  NMR (101 MHz,  $\text{CDCl}_3$ )  $\delta = 162.62$  ( $J = 248.60$  Hz), 152.69, 149.04, 144.39, 134.61 ( $J = 3.22$  Hz), 129.10 ( $J = 8.34$  Hz), 117.00, 116.26 ( $J = 21.83$  Hz), 112.46, 104.69, 102.01, 94.14, 54.82.  $^{19}\text{F}$  NMR (376 MHz,  $\text{CDCl}_3$ ):  $\delta = -113.34$  (s, 1F). MS (ESI $^+$ ): calcd. for  $\text{C}_{15}\text{H}_{10}\text{FO}_3$ :  $[\text{M}-\text{NO}_2]^+$ : 257.0608, found 257.0612.

#### 7-(2-chlorophenyl)-6-nitro-6,7-dihydro-[1,3]dioxolo[4,5-f]benzofuran 3ka

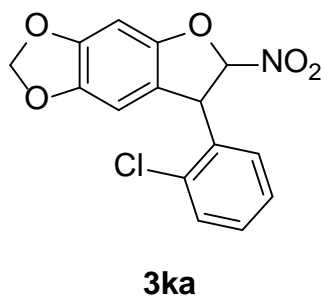

Prepared according to **general procedure**. Light yellow solid, 99% yield, m.p. 110.0-110.8 °C. IR (thin film):  $\nu_{\text{max}} = 3017, 2913, 1566, 1479, 1462, 1300, 1250, 1037, 753$   $\text{cm}^{-1}$ .  $^1\text{H}$  NMR (400 MHz,  $\text{CDCl}_3$ )  $\delta = 7.53 - 7.41$  (m, 1H), 7.33 – 7.12 (m, 2H), 6.87 – 6.76 (m, 1H), 6.72 (s, 1H), 6.61 (s, 1H), 6.04 – 5.91 (m, 3H), 5.37 (br, 1H).  $^{13}\text{C}$  NMR (101 MHz,  $\text{CDCl}_3$ )  $\delta = 152.97, 149.06, 144.36, 136.17, 133.47, 130.16, 129.66, 128.80, 127.63, 116.76, 111.86, 104.78, 102.02, 94.20, 51.64$ . MS (ESI $^+$ ): calcd. for  $\text{C}_{15}\text{H}_{10}^{34.9689}\text{ClO}_3$ :  $[\text{M}-\text{NO}_2]^+$ : 273.0313, found 273.0309. MS (ESI $^+$ ): calcd. for  $\text{C}_{15}\text{H}_{10}^{36.9659}\text{ClO}_3$ :  $[\text{M}-\text{NO}_2]^+$ : 275.0289, found 275.0278.

#### 7-(3-chlorophenyl)-6-nitro-6,7-dihydro-[1,3]dioxolo[4,5-f]benzofuran 3la

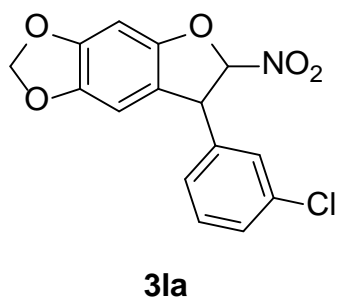



Prepared according to **general procedure**. Light yellow solid, 95% yield, m.p. 137.0-137.7 °C, IR (thin film):  $\nu_{\max}$  = 3007, 2917, 1562, 1474, 1468, 1305, 1232, 1041, 824  $\text{cm}^{-1}$ ,  $^1\text{H}$  NMR (400 MHz,  $\text{CDCl}_3$ )  $\delta$  = 7.37 – 7.24 (m, 2H), 7.17 – 6.97 (m, 2H), 6.73 (s, 1H), 6.56 (s, 1H), 6.00 (dd,  $J$  = 7.0, 1.2, 2H), 5.93 (d,  $J$  = 1.6, 1H), 4.80 (br, 1H).  $^{13}\text{C}$  NMR (101 MHz,  $\text{CDCl}_3$ )  $\delta$  = 152.78, 149.18, 144.45, 140.70, 135.27, 130.62, 128.70, 127.50, 125.65, 116.39, 112.13, 104.68, 102.06, 94.23, 55.07. MS ( $\text{ESI}^+$ ): calcd. for  $\text{C}_{15}\text{H}_{10}^{34.9689}\text{ClO}_3$ :  $[\text{M}-\text{NO}_2]^+$ : 273.0313, found 273.0321. MS ( $\text{ESI}^+$ ): calcd. for  $\text{C}_{15}\text{H}_{10}^{36.9659}\text{ClO}_3$ :  $[\text{M}-\text{NO}_2]^+$ : 275.0289, found 275.0291.

**7-(4-chlorophenyl)-6-nitro-6,7-dihydro-[1,3]dioxolo[4,5-f]benzofuran 3ma**

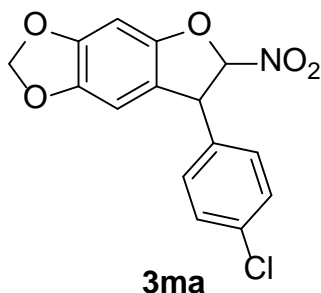

Prepared according to **general procedure**. Light yellow solid, 98% yield, m.p. 116.5-117.2 °C. IR (thin film):  $\nu_{\max}$  = 3049, 2920, 2850, 1569, 1293, 1477, 1460, 1245, 836.  $^1\text{H}$  NMR (400 MHz,  $\text{CDCl}_3$ )  $\delta$  = 7.34 (d,  $J$  = 8.4, 2H), 7.09 (d,  $J$  = 8.4, 2H), 6.73 (s, 1H), 6.55 (s, 1H), 6.05 – 5.94 (m, 2H), 5.90 (d,  $J$  = 1.5, 1H), 4.81 (br, 1H).  $^{13}\text{C}$  NMR (101 MHz,  $\text{CDCl}_3$ )  $\delta$  = 152.73, 149.10, 144.42, 137.26, 134.44, 129.50, 128.76, 116.69, 112.25, 104.66, 102.04, 94.18, 54.90. MS ( $\text{ESI}^+$ ): calcd. for  $\text{C}_{15}\text{H}_{10}^{34.9689}\text{ClO}_3$ :  $[\text{M}-\text{NO}_2]^+$ : 273.0313, found 273.0309. MS ( $\text{ESI}^+$ ): calcd. for  $\text{C}_{15}\text{H}_{10}^{36.9659}\text{ClO}_3$ :  $[\text{M}-\text{NO}_2]^+$ : 275.0289, found 275.0279.

**7-(2-bromophenyl)-6-nitro-6,7-dihydro-[1,3]dioxolo[4,5-f]benzofuran 3na**

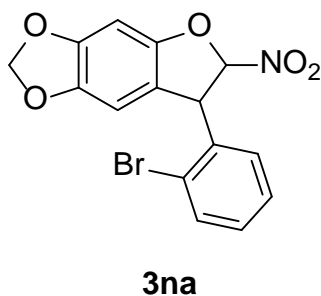

Prepared according to **general procedure**. Light yellow solid, 88% yield, m.p. 119.4-120.4 °C, IR (thin film):  $\nu_{\max}$  = 3010, 2910, 1567, 1536, 1459, 1294, 1251, 1035, 751  $\text{cm}^{-1}$ ,  $^1\text{H}$  NMR (400 MHz,  $\text{CDCl}_3$ )  $\delta$  = 7.74 – 7.60 (m, 1H), 7.31 – 7.09 (m, 2H), 6.83 – 6.75 (m, 1H), 6.72 (s, 1H), 6.62 (s, 1H), 6.10 – 5.85 (m, 3H), 5.39 (br, 1H).  $^{13}\text{C}$  NMR (101 MHz,  $\text{CDCl}_3$ )  $\delta$  = 152.92, 149.07, 144.37, 137.99, 133.48, 129.88, 128.93, 128.29, 123.71, 117.19, 112.02, 104.74, 102.00, 94.20, 53.95. MS ( $\text{ESI}^+$ ): calcd. for  $\text{C}_{15}\text{H}_{10}^{78.9183}\text{BrO}_3$ :  $[\text{M}-\text{NO}_2]^+$ : 316.9808, found 316.9803. MS ( $\text{ESI}^+$ ): calcd. for  $\text{C}_{15}\text{H}_{10}^{80.9163}\text{BrO}_3$ :  $[\text{M}-\text{NO}_2]^+$ : 318.9793, found 318.9782.

**7-(3-bromophenyl)-6-nitro-6,7-dihydro-[1,3]dioxolo[4,5-f]benzofuran 3oa**

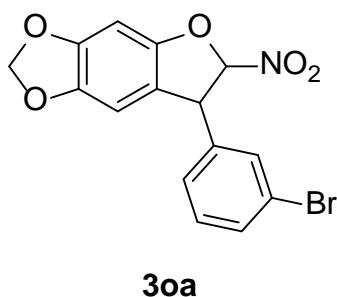

Prepared according to **general procedure**. Light yellow solid, 92% yield, m.p. 95.1-95.6 °C, IR (thin film):  $\nu_{\max}$  = 3014, 2900, 1565, 1478, 1462, 1293, 1040, 806, 703  $\text{cm}^{-1}$ .  $^1\text{H}$  NMR (400 MHz,  $\text{CDCl}_3$ )  $\delta$  = 7.50 – 7.44 (m, 1H), 7.31 – 7.21 (m, 2H), 7.14 – 7.08 (m, 1H), 6.73 (s, 1H), 6.56 (s, 1H), 6.02 – 5.96 (m, 2H), 5.92 (d,  $J$  = 1.6, 1H), 4.79 (br, 1H).  $^{13}\text{C}$  NMR (101 MHz,  $\text{CDCl}_3$ )  $\delta$  = 152.77, 149.18, 144.46, 140.95, 131.65, 130.89, 130.39, 126.13, 123.41, 116.38, 112.12, 104.67, 102.07, 94.24, 55.03. MS ( $\text{ESI}^+$ ): calcd. for  $\text{C}_{15}\text{H}_{10}^{78,9183}\text{BrO}_3$ :  $[\text{M}-\text{NO}_2]^+$ : 316.9808, found 316.9804. MS ( $\text{ESI}^+$ ): calcd. for  $\text{C}_{15}\text{H}_{10}^{80,9163}\text{BrO}_3$ :  $[\text{M}-\text{NO}_2]^+$ : 318.9793, found 318.9782.

**7-(4-bromophenyl)-6-nitro-6,7-dihydro-[1,3]dioxolo[4,5-f]benzofuran 3pa**

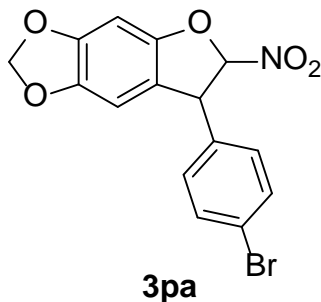

Prepared according to **general procedure**. Light yellow solid, 96% yield. m.p. 126.0-126.4 °C. IR (thin film):  $\nu_{\max}$  = 3040, 2912, 2854, 1579, 1499, 1463, 1300, 1244, 1043, 860.  $^1\text{H}$  NMR (400 MHz,  $\text{CDCl}_3$ )  $\delta$  = 7.49 (d,  $J$  = 8.4, 2H), 7.03 (d,  $J$  = 8.4, 2H), 6.72 (s, 1H), 6.54 (s, 1H), 6.04 – 5.94 (m, 2H), 5.90 (d,  $J$  = 1.4, 1H), 4.79 (br, 1H).  $^{13}\text{C}$  NMR (101 MHz,  $\text{CDCl}_3$ )  $\delta$  = 152.74, 149.11, 144.42, 137.79, 132.47, 129.08, 122.53, 116.62, 112.16, 104.65, 102.04, 94.18, 54.96. MS ( $\text{ESI}^+$ ): calcd. for  $\text{C}_{15}\text{H}_{10}^{78,9183}\text{BrO}_3$ :  $[\text{M}-\text{NO}_2]^+$ : 316.9808, found 316.9804. MS ( $\text{ESI}^+$ ): calcd. for  $\text{C}_{15}\text{H}_{10}^{80,9163}\text{BrO}_3$ :  $[\text{M}-\text{NO}_2]^+$ : 318.9793, found 318.9783.

**7-(3,4-dimethylphenyl)-6-nitro-6,7-dihydro-[1,3]dioxolo[4,5-f]benzofuran 3qa**

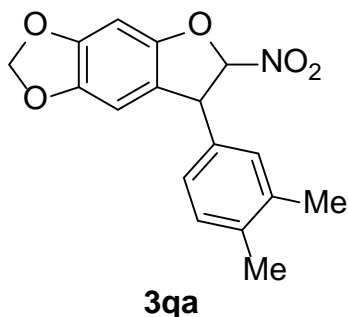

Prepared according to **general procedure**. Light yellow solid, 90% yield, m.p. 125.2-125.9 °C. IR (thin film):  $\nu_{\max}$  = 3020, 2925, 2860, 1570, 1470, 1372, 1293, 882, 826, 705.  $^1\text{H}$  NMR (400 MHz,  $\text{CDCl}_3$ )  $\delta$  = 7.16 – 7.06 (m, 1H), 6.96 – 6.79 (m, 2H), 6.72 (s, 1H), 6.55 (s, 1H), 5.98 (dd,  $J$  = 7.0, 1.2, 2H), 5.94 (d,  $J$  = 1.7, 1H), 4.75 (br, 1H), 2.25 (s, 6H).  $^{13}\text{C}$  NMR (101 MHz,  $\text{CDCl}_3$ )  $\delta$  = 152.64, 148.74, 144.19, 137.71, 136.91, 136.34, 130.43, 128.43, 124.64, 117.60, 112.86, 104.82, 101.89, 94.02, 55.30, 19.83, 19.45. MS ( $\text{ESI}^+$ ): calcd. for  $\text{C}_{17}\text{H}_{15}\text{O}_3$ :  $[\text{M}-\text{NO}_2]^+$ : 267.1021, found 267.1024.

**7-(3,4-dichlorophenyl)-6-nitro-6,7-dihydro-[1,3]dioxolo[4,5-f]benzofuran 3ra**

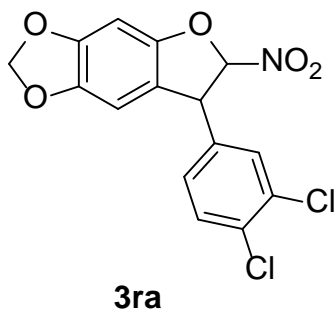

Prepared according to **general procedure**. Light yellow solid, 99% yield, m.p. 119.9-120.6 °C. IR (thin film):  $\nu_{\max}$  = 3020, 2910, 1568, 1498, 1479, 1460, 1296, 1238, 1038, 865, 830, 728.  $^1\text{H}$  NMR (400 MHz,  $\text{CDCl}_3$ )  $\delta$  = 7.52 – 7.37 (m, 1H), 7.30 – 7.15 (m, 1H), 7.08 – 6.93 (m, 1H), 6.73 (s, 1H), 6.55 (s, 1H), 6.08 – 5.95 (m, 2H), 5.89 (d,  $J=1.6$ , 1H), 4.79 (br, 1H).  $^{13}\text{C}$  NMR (101 MHz,  $\text{CDCl}_3$ )  $\delta$  = 152.79, 149.35, 144.57, 138.84, 133.56, 132.83, 131.30, 129.35, 126.78, 115.98, 111.86, 104.54, 102.12, 94.30, 54.55. MS ( $\text{ESI}^+$ ): Calcd for  $\text{C}_{15}\text{H}_9^{34,9689}\text{Cl}_2\text{NO}_5$ :  $[\text{M}-\text{NO}_2]^+$  : 306.9929, Found:  $m/z$  306.9933.

**7-(2,4-dichlorophenyl)-6-nitro-6,7-dihydro-[1,3]dioxolo[4,5-f]benzofuran 3sa**

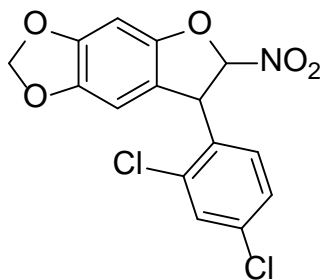

**3sa**

Prepared according to **general procedure**. Light brown solid, 97% yield. m.p. 56.8-57.5 °C. IR (thin film):  $\nu_{\max}$  = 3033, 2910, 1565, 1479, 1460, 1295, 1232, 1034, 866, 828.  $^1\text{H}$  NMR (400 MHz,  $\text{CDCl}_3$ )  $\delta$  = 7.53 – 7.47 (m, 1H), 7.21 – 7.13 (m, 1H), 6.75 – 6.68 (m, 2H), 6.58 (s, 1H), 6.00 (dd,  $J = 5.1, 1.2$ , 2H), 5.94 (d,  $J = 1.4$ , 1H), 5.31 (br, 1H).  $^{13}\text{C}$  NMR (101 MHz,  $\text{CDCl}_3$ )  $\delta$  = 153.01, 149.27, 144.51, 135.01, 134.74, 134.20, 129.97, 129.76, 127.95, 116.16, 111.48, 104.63, 102.10, 94.33, 51.20. MS ( $\text{ESI}^+$ ): Calcd for  $\text{C}_{15}\text{H}_9^{34,9689}\text{Cl}_2\text{NO}_5$ :  $[\text{M}-\text{NO}_2]^+$  : 306.9929, Found:  $m/z$  306.9939.

**7-(naphthalen-1-yl)-6-nitro-6,7-dihydro-[1,3]dioxolo[4,5-f]benzofuran 3ta**

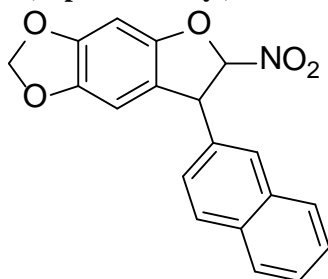

**3ta**

Prepared according to **general procedure**. Yellow solid, 95% yield. m.p. 160.3-160.9 °C. IR (thin film):  $\nu_{\max}$  = 3051, 2916, 1568, 1498, 1458, 1293, 1038, 880, 830, 730.  $^1\text{H}$  NMR (400 MHz,  $\text{CDCl}_3$ )  $\delta$  = 7.93 – 7.74 (m, 3H), 7.58 – 7.44 (m, 3H), 7.33 – 7.20 (m, 1H), 6.77 (s, 1H), 6.59 (s, 1H), 6.02 (d,  $J = 1.7$ , 1H), 5.99 (dd,  $J = 7.9, 1.2$ , 2H), 4.98 (br, 1H).  $^{13}\text{C}$  NMR (101 MHz,  $\text{CDCl}_3$ )  $\delta$  = 152.82, 148.99, 144.34, 136.07, 133.33, 133.04, 129.48, 127.97, 127.77, 126.79, 126.62, 126.44, 124.81, 117.22, 112.52, 104.92, 101.99, 94.17, 55.77. MS ( $\text{ESI}^+$ ): Calcd for  $\text{C}_{19}\text{H}_{13}\text{O}_3$ :  $[\text{M}-\text{NO}_2]^+$  : 289.0859, Found:  $m/z$  289.0866.

**6-nitro-7-(thiophen-3-yl)-6,7-dihydro-[1,3]dioxolo[4,5-f]benzofuran 3ua**

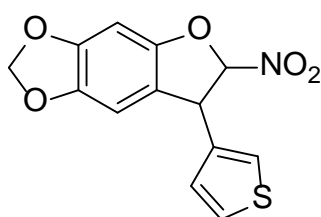

**3ua**

Prepared according to **general procedure**. Light brown solid, 89% yield. m.p. 32.6-33.5 °C. IR (thin film):  $\nu_{\max}$  = 3023, 2918, 1568, 1508, 1470, 1292, 1258, 758.  $^1\text{H}$  NMR (400 MHz,  $\text{CDCl}_3$ )  $\delta$  = 7.41 – 7.33 (m, 1H), 7.05 – 7.01 (m, 1H), 6.98 – 6.94 (m, 1H), 6.71 (s, 1H), 6.63 (s, 1H), 6.04 – 5.95 (m, 3H), 4.92 (br, 1H).  $^{13}\text{C}$  NMR (101 MHz,  $\text{CDCl}_3$ )  $\delta$  = 152.46, 148.90, 144.20, 139.30, 127.66, 126.24, 122.84, 116.98, 111.93, 104.70, 101.96, 94.17, 50.92. MS ( $\text{ESI}^+$ ): Calcd for  $\text{C}_{13}\text{H}_9\text{O}_3\text{S}$ :  $[\text{M}-\text{NO}_2]^+$  : 245.0267, Found:  $m/z$  245.0272.

### 5,6-dimethoxy-2-nitro-3-phenyl-2,3-dihydrobenzofuran 3ab

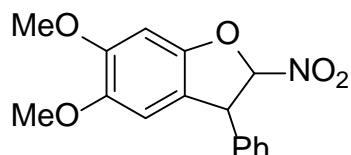

**3ab**

Prepared according to **general procedure**. White solid, 95% yield. m.p. 104.0-104.6 °C. IR (thin film):  $\nu_{\max}$  = 3033, 2958, 2870, 2840, 1600, 1580, 1455, 1372, 1302, 1243, 1032, 883, 830, 700.  $^1\text{H}$  NMR (400 MHz,  $\text{CDCl}_3$ )  $\delta$  = 7.38 – 7.32 (m, 3H), 7.17 – 7.13 (m, 2H), 6.80 (s, 1H), 6.66 (s, 1H), 5.95 (d,  $J$  = 1.7, 1H), 4.89 (br, 1H), 3.93 (s, 3H), 3.78 (s, 3H).  $^{13}\text{C}$  NMR (101 MHz,  $\text{CDCl}_3$ )  $\delta$  = 152.37, 150.70, 145.96, 138.99, 129.31, 128.37, 127.44, 115.82, 112.54, 107.92, 95.59, 56.59, 56.27, 56.00.

### 8-methoxy-2-nitro-1-phenyl-1,2-dihydronaphtho[2,1-b]furan 3ac

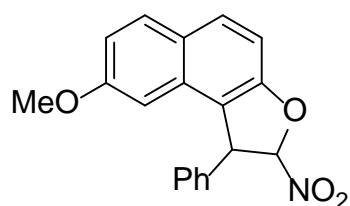

**3ac**

Prepared according to **general procedure**. White solid, 93% yield. m.p. 122.0-122.3 °C. IR (thin film):  $\nu_{\max}$  = 3030, 2967, 2881, 2836, 1576, 1517, 1475, 1300, 1248, 1052, 755, 700.  $^1\text{H}$  NMR (400 MHz,  $\text{CDCl}_3$ )  $\delta$  7.79 (dd,  $J$  = 24.7, 8.9 Hz, 2H), 7.43 – 7.26 (m, 4H), 7.24 – 7.14 (m, 2H), 7.01 (dd,  $J$  = 9.0, 2.5 Hz, 1H), 6.58 (d,  $J$  = 2.4 Hz, 1H), 6.11 (d,  $J$  = 1.8 Hz, 1H), 5.25 (d,  $J$  = 1.1 Hz, 1H), 3.68 (s, 3H).  $^{13}\text{C}$  NMR (101 MHz,  $\text{CDCl}_3$ )  $\delta$  158.91, 156.74, 137.78, 131.08, 131.03, 130.60, 129.37, 128.41, 127.55, 126.23, 117.37, 117.00, 112.53, 109.14, 101.57, 55.37, 55.17.

### 8-bromo-2-nitro-1-phenyl-1,2-dihydronaphtho[2,1-b]furan 3ad

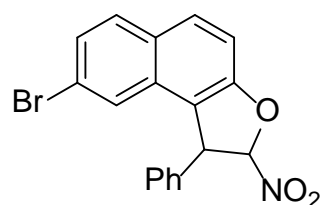

**3ad**

Prepared according to **general procedure**. White solid, 97% yield. m.p. 145.8-146.4 °C. IR (thin film):  $\nu_{\max}$  = 3030, 2910, 1572, 1495, 1457, 1252, 1048, 750.  $^1\text{H}$  NMR (400 MHz,  $\text{CDCl}_3$ )  $\delta$  = 7.88 (d,  $J$  = 8.9, 1H), 7.74 (d,  $J$  = 8.8, 1H), 7.56 – 7.31 (m, 6H), 7.22 – 7.14 (m, 2H), 6.10 (d,  $J$  = 1.7, 1H), 5.27 (s, 1H).  $^{13}\text{C}$  NMR (101 MHz,  $\text{CDCl}_3$ )  $\delta$  = 156.99, 137.40, 131.56, 130.79, 130.69, 129.59, 129.26, 128.70, 128.10, 127.46, 125.17, 122.26, 117.70, 112.38,

112.32, 55.10.

### 2-nitro-1-phenyl-1,2-dihydronaphtho[2,1-b]furan 3ae

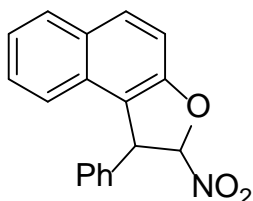

**3ae**

Prepared according to **general procedure**. White solid, 98% yield. m.p. 102.4-103.2 °C. IR (thin film):  $\nu_{\max}$  = 3029, 2920, 1579, 1520, 1460, 1300, 1253, 1053, 753, 699.  $^1\text{H}$  NMR (400 MHz,  $\text{CDCl}_3$ )  $\delta$  = 7.97 – 7.87 (m, 2H), 7.46 (d,  $J$  = 8.9, 1H), 7.42 – 7.31 (m, 6H), 7.24 – 7.17 (m, 2H), 6.12 (d,  $J$  = 1.7, 1H), 5.33 (br, 1H).  $^{13}\text{C}$  NMR (101 MHz,  $\text{CDCl}_3$ )  $\delta$  = 156.22, 137.94, 131.51, 130.88, 129.61, 129.43, 129.09, 128.47, 127.69, 127.58, 124.55, 123.04, 118.30, 112.51, 111.87, 55.40.

### 7-bromo-2-nitro-1-phenyl-1,2-dihydronaphtho[2,1-b]furan 3af

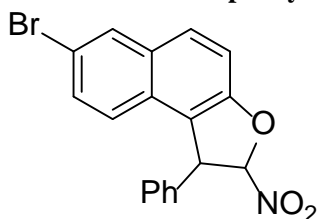

**3af**

Prepared according to **general procedure**. White solid, 99% yield. m.p. 123.6-124.1 °C. IR (thin film):  $\nu_{\max}$  = 3033, 2915, 1585, 1508, 1298, 1248, 1053, 740.  $^1\text{H}$  NMR (400 MHz,  $\text{CDCl}_3$ )  $\delta$  8.03 (d,  $J$  = 1.8 Hz, 1H), 7.82 (d,  $J$  = 8.9 Hz, 1H), 7.46 (d,  $J$  = 8.9 Hz, 1H), 7.42 (dd,  $J$  = 8.9, 1.9 Hz, 1H), 7.38 – 7.28 (m, 3H), 7.22 (d,  $J$  = 8.8 Hz, 1H), 7.18 – 7.12 (m, 2H), 6.10 (d,  $J$  = 1.8 Hz, 1H), 5.29 (br, 1H).  $^{13}\text{C}$  NMR (101 MHz,  $\text{CDCl}_3$ )  $\delta$  = 156.48, 137.60, 131.95, 131.06, 131.02, 130.63, 129.52, 128.66, 128.07, 127.50, 124.65, 118.72, 118.29, 112.99, 112.33, 55.24.

### 7-bromo-1-(2-fluorophenyl)-2-nitro-1,2-dihydronaphtho[2,1-b]furan 3hf

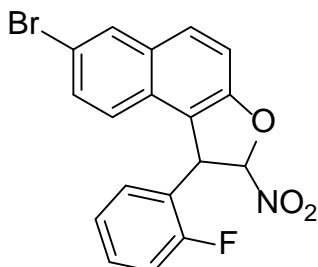

**3hf**

Prepared according to **general procedure**. Light yellow solid, 95% yield. m.p. 120.8-121.5 °C. IR (thin film):  $\nu_{\max}$  = 3023, 2923, 1573, 1491, 1457, 1250, 1050, 860.  $^1\text{H}$  NMR (400 MHz,  $\text{CDCl}_3$ )  $\delta$  = 8.02 (d,  $J$  = 1.3, 1H), 7.81 (d,  $J$  = 8.9, 1H), 7.45 (d,  $J$  = 8.8, 2H), 7.40 – 7.11 (m, 3H), 6.99 (t,  $J$  = 7.5, 1H), 6.72 (t,  $J$  = 7.1, 1H), 6.15 (d,  $J$  = 1.2,

1H), 5.61 (br, 1H). <sup>13</sup>C NMR (101 MHz, CDCl<sub>3</sub>) δ = 160.11 (*J* = 249.23), 156.55, 131.93, 131.19, 131.10, 130.75, 130.50 (*J* = 8.30), 128.81, 128.79, 127.94, 125.05 (*J* = 3.69), 124.56 (*J* = 14.17), 124.32, 118.18 (*J* = 39.73), 116.20 (*J* = 21.36), 113.00, 111.56, 47.88.

**7-bromo-1-(3-chlorophenyl)-2-nitro-1,2-dihydronaphtho[2,1-b]furan 3lf**

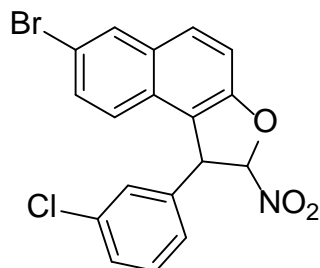

**3lf**

Prepared according to **general procedure**. Light yellow solid, 95% yield. m.p. 142.1-142.8 °C. IR (thin film):  $\nu_{\max}$  = 3029, 2924, 1575, 1492, 1455, 1294, 1247, 1052, 800, 722. <sup>1</sup>H NMR (400 MHz, CDCl<sub>3</sub>) δ = 8.11 – 7.97 (m, 1H), 7.83 (d, *J* = 8.9, 1H), 7.50 – 7.42 (m, 2H), 7.32 (d, *J* = 8.4, 2H), 7.18 (d, *J* = 8.8, 1H), 7.10 (d, *J* = 8.4, 2H), 6.06 (d, *J* = 1.6, 1H), 5.28 (br, 1H). <sup>13</sup>C NMR (101 MHz, CDCl<sub>3</sub>) δ = 156.53, 136.02, 134.70, 131.99, 131.18, 131.15, 130.88, 129.73, 128.87, 127.91, 124.42, 118.43, 118.17, 113.00, 111.98, 54.57, 54.55.

**7-bromo-1-(4-chlorophenyl)-2-nitro-1,2-dihydronaphtho[2,1-b]furan 3mf**

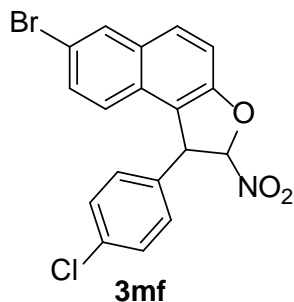

**3mf**

Prepared according to **general procedure**. Light yellow solid, 95% yield, m.p. 145.5-146.2 °C. IR (thin film):  $\nu_{\max}$  = 3027, 2945, 1568, 1490, 1460, 1300, 1245, 1050, 830. <sup>1</sup>H NMR (400 MHz, CDCl<sub>3</sub>) δ 8.03 (s, 1H), 7.82 (d, *J* = 8.9 Hz, 1H), 7.51 – 7.39 (m, 2H), 7.31 (d, *J* = 7.6 Hz, 2H), 7.17 (d, *J* = 8.8 Hz, 1H), 7.09 (d, *J* = 7.7 Hz, 2H), 6.05 (br, 1H), 5.27 (br, 1H). <sup>13</sup>C NMR (101 MHz, CDCl<sub>3</sub>) δ = 156.52, 136.02, 134.70, 131.98, 131.17, 131.15, 130.88, 129.73, 128.88, 127.90, 124.43, 118.43, 118.18, 113.00, 111.98, 54.57.

**7-bromo-1-(4-bromophenyl)-2-nitro-1,2-dihydronaphtho[2,1-b]furan 3pf**

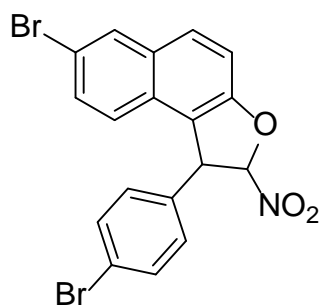

**3pf**

Prepared according to **general procedure**. Pink solid, 99% yield. m.p. 160.4-161.4 °C. IR (thin film):  $\nu_{\max}$  = 3016, 2893, 1568, 1477, 1244, 1039, 1295, 837.  $^1\text{H}$  NMR (400 MHz,  $\text{CDCl}_3$ )  $\delta$  = 8.04 (d,  $J$  = 1.7, 1H), 7.83 (d,  $J$  = 8.9, 1H), 7.51 – 7.42 (m, 4H), 7.18 (d,  $J$  = 8.8, 1H), 7.04 (d,  $J$  = 8.4, 2H), 6.05 (d,  $J$  = 1.7, 1H), 5.26 (br, 1H).  $^{13}\text{C}$  NMR (101 MHz,  $\text{CDCl}_3$ )  $\delta$  = 156.53, 136.53, 132.69, 131.98, 131.19, 131.16, 130.90, 129.19, 127.89, 124.42, 122.81, 118.44, 118.10, 113.01, 111.87, 54.63, 54.60.

**7-bromo-1-(3,4-dimethylphenyl)-2-nitro-1,2-dihydronaphtho[2,1-b]furan 3qf**

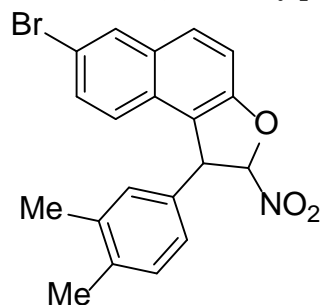

**3qf**

Prepared according to **general procedure**. Light yellow solid, 95% yield. m.p. 171.5-172.4 °C. IR (thin film):  $\nu_{\max}$  = 3023, 2968, 2938, 1598, 1498, 1456, 1373, 1303, 1248, 1051, 886, 832, 690.  $^1\text{H}$  NMR (400 MHz,  $\text{CDCl}_3$ )  $\delta$  8.03 (d,  $J$  = 1.7 Hz, 1H), 7.81 (d,  $J$  = 8.9 Hz, 1H), 7.50 – 7.39 (m, 2H), 7.24 (s, 1H), 7.08 (d,  $J$  = 7.7 Hz, 1H), 6.94 (s, 1H), 6.84 (d,  $J$  = 7.7 Hz, 1H), 6.08 (d,  $J$  = 1.7 Hz, 1H), 5.22 (br 1H), 2.22 (d,  $J$  = 7.2 Hz, 6H).  $^{13}\text{C}$  NMR (101 MHz,  $\text{CDCl}_3$ )  $\delta$  = 156.38, 137.93, 137.17, 135.08, 131.94, 130.99, 130.92, 130.58, 130.42, 128.54, 128.13, 124.76, 124.72, 119.03, 118.20, 112.97, 112.61, 55.01, 19.86, 19.49.

## 6. Copies of $^1\text{H}$ NMR, $^{13}\text{C}$ NMR and $^{19}\text{F}$ NMR spectra for the products

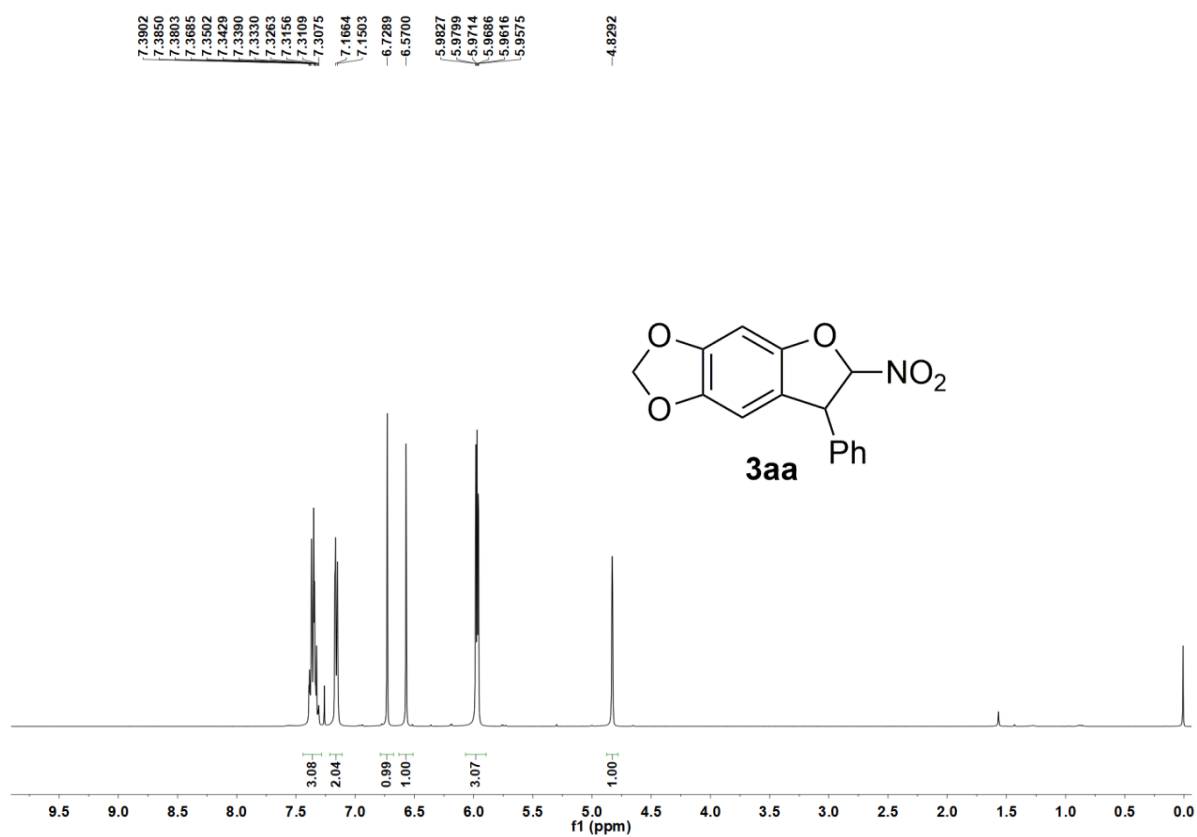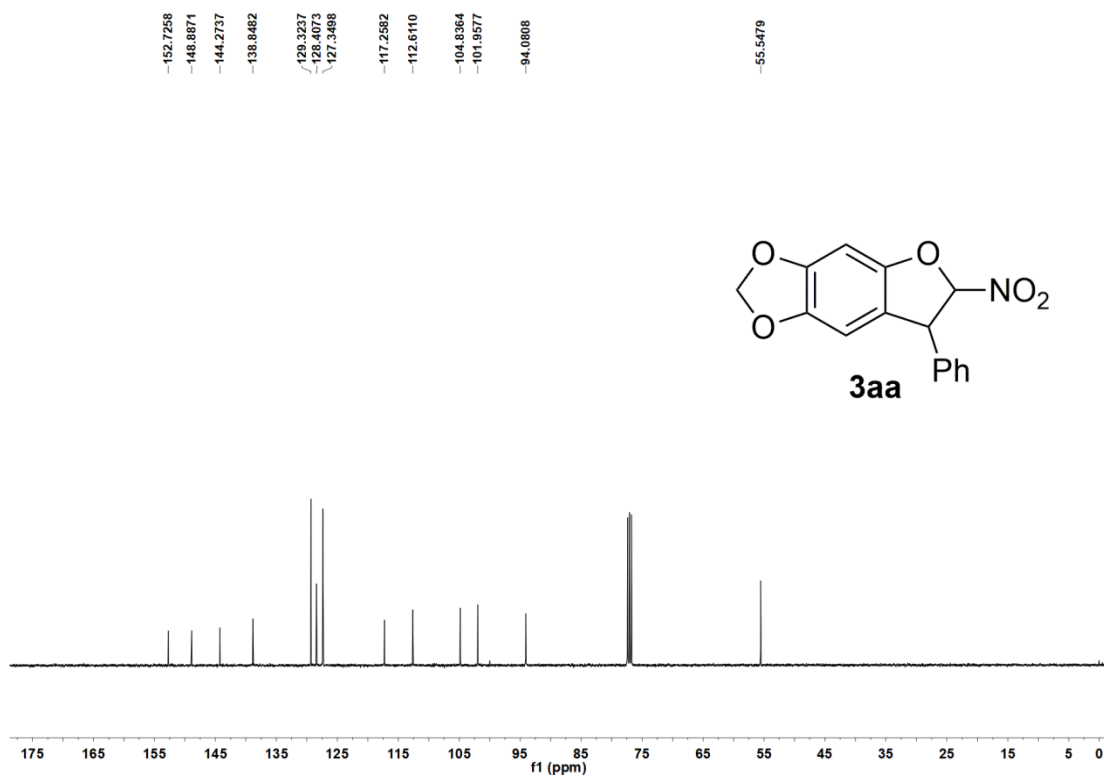



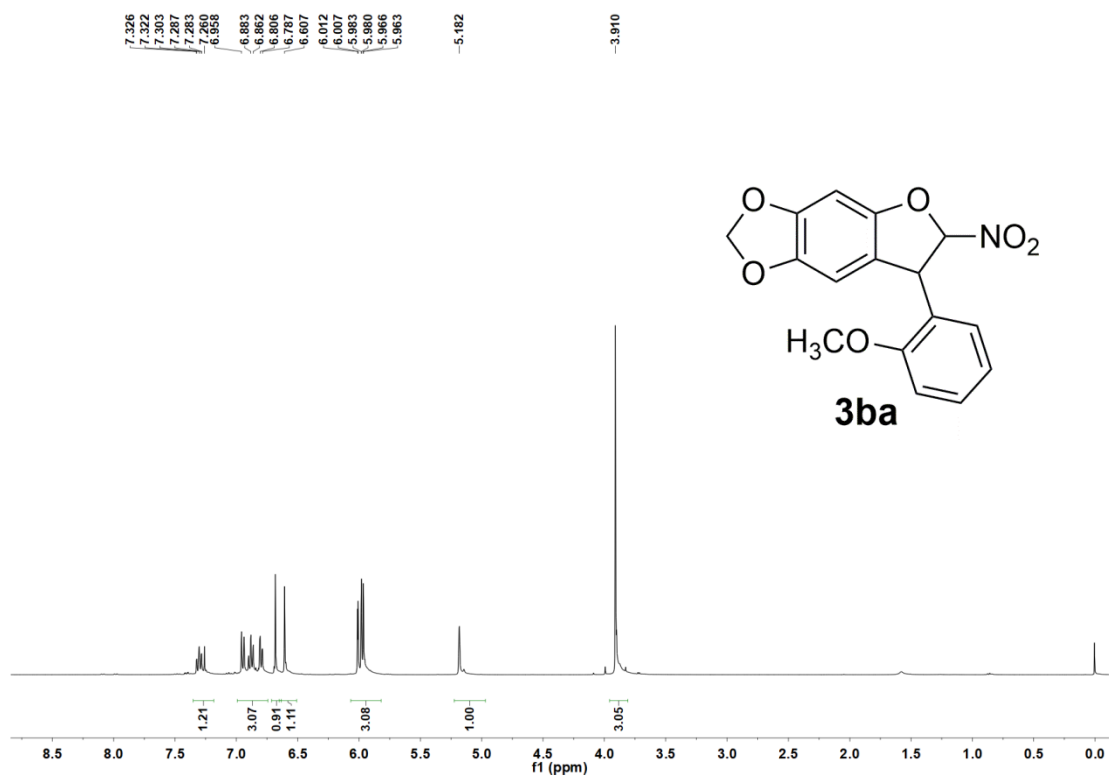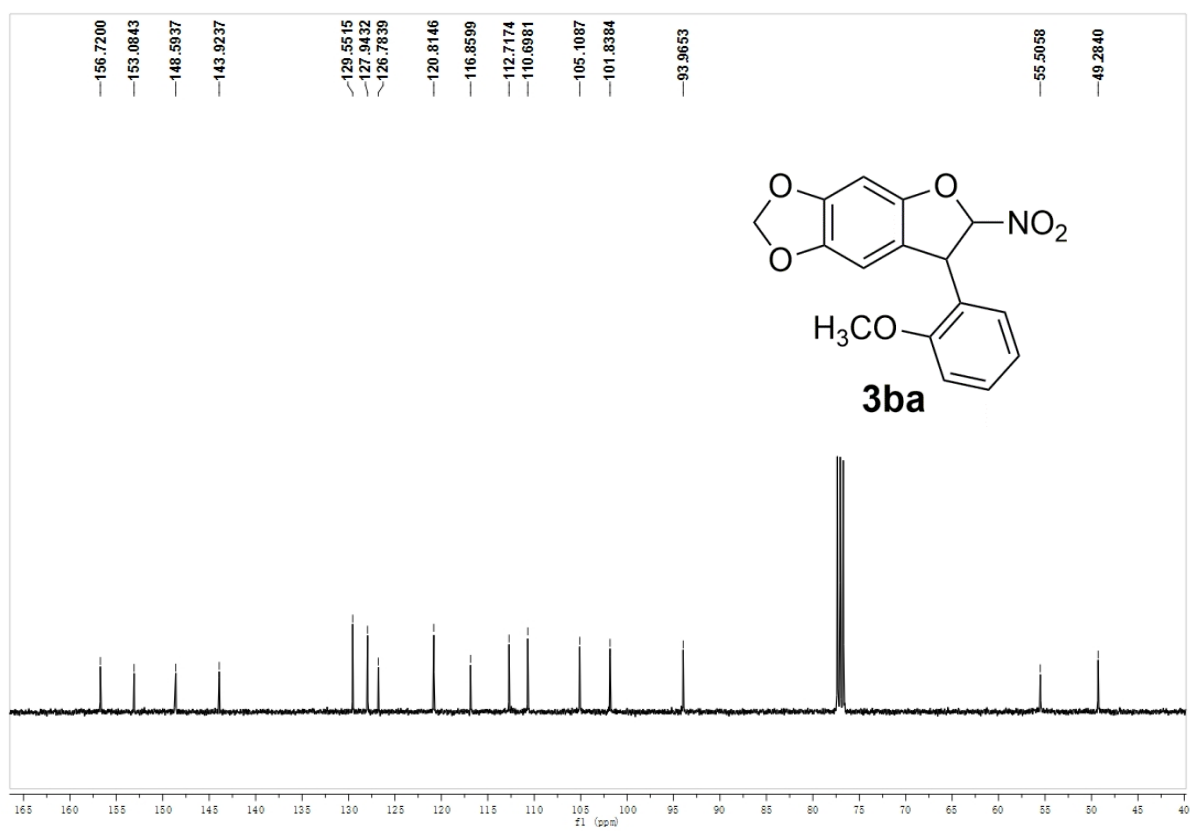

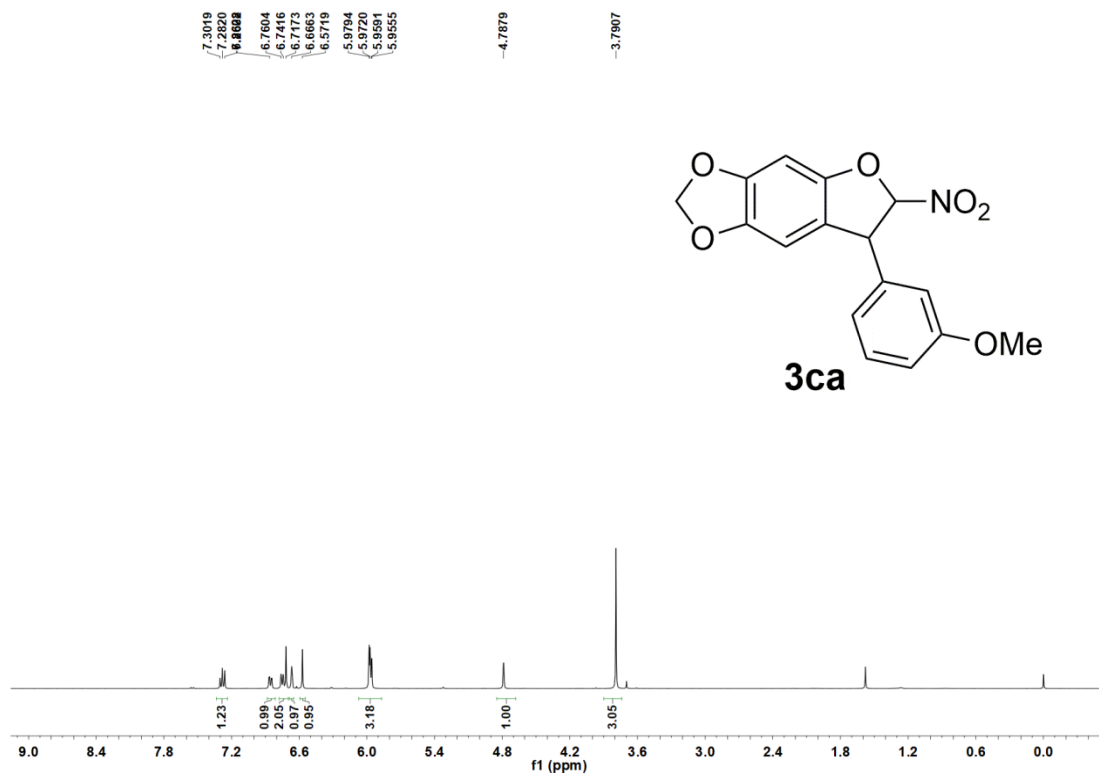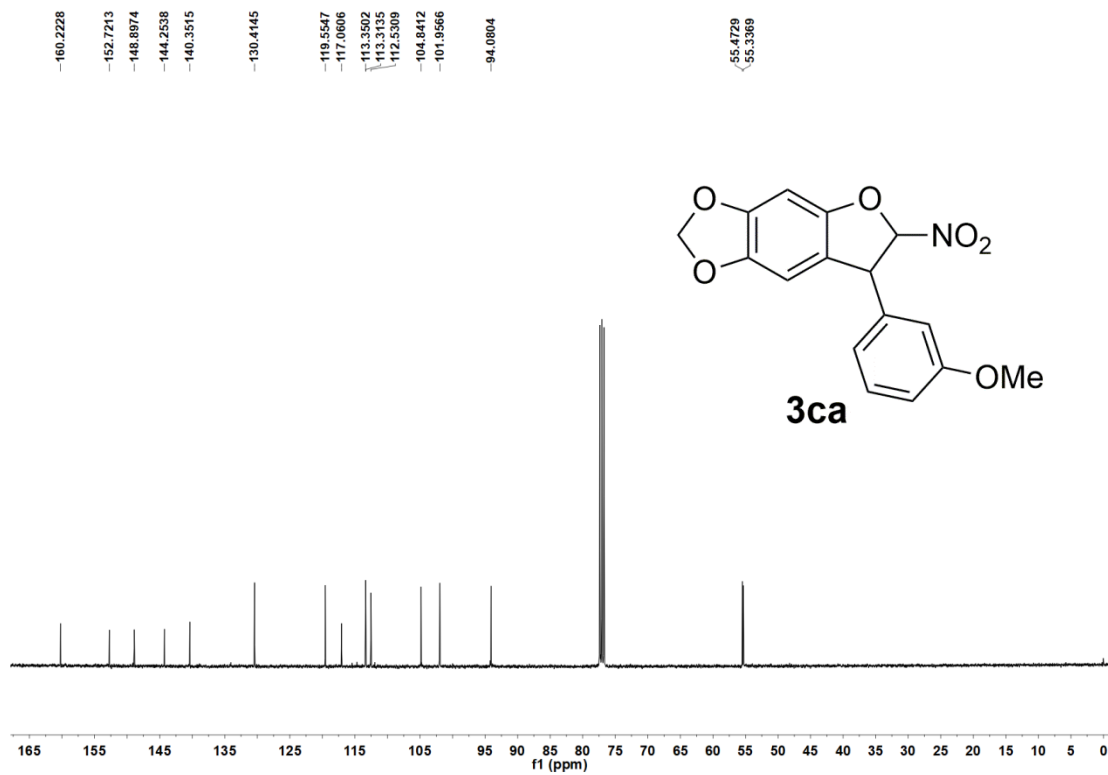

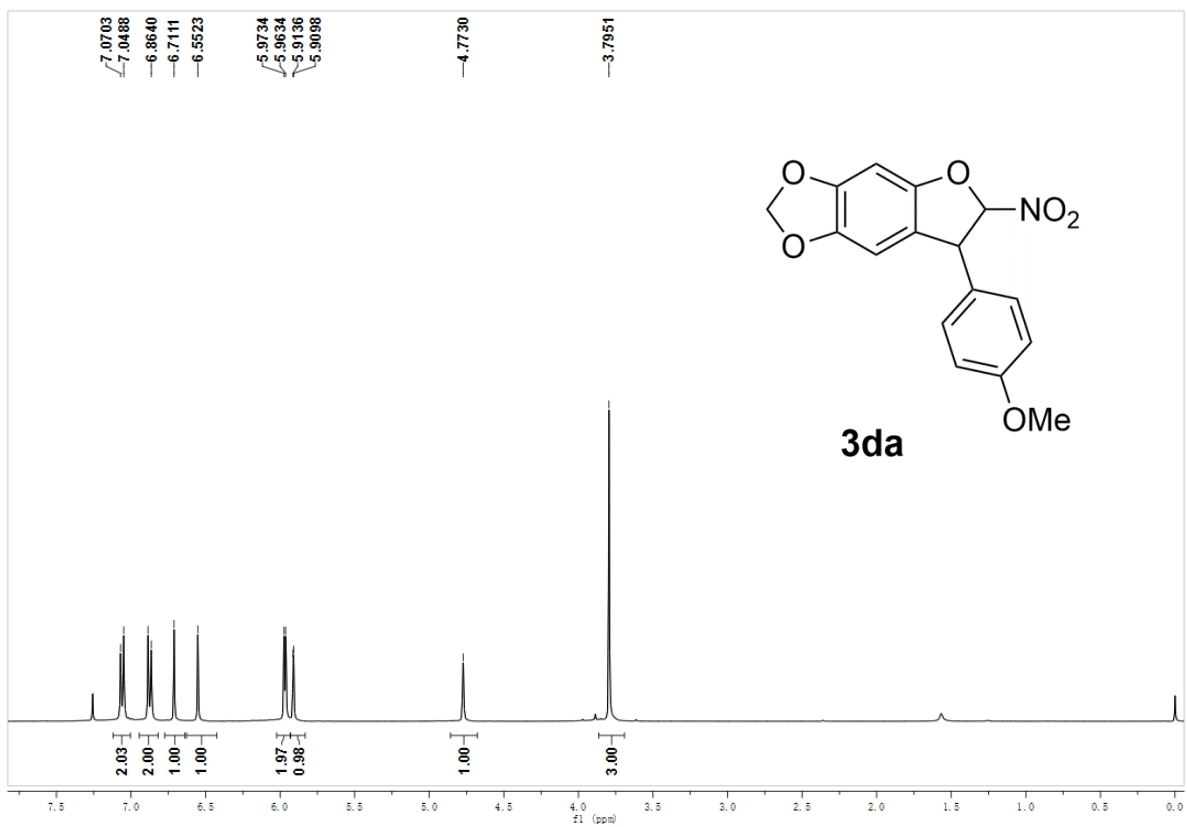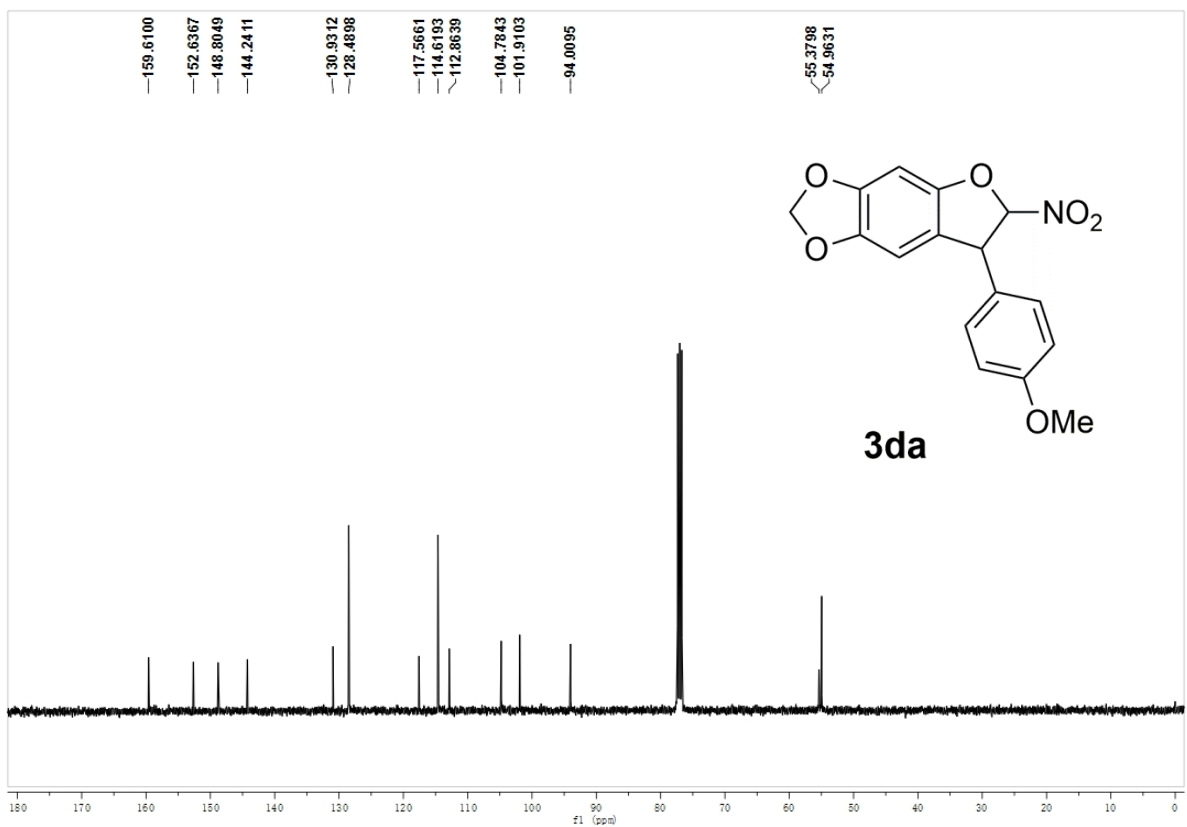

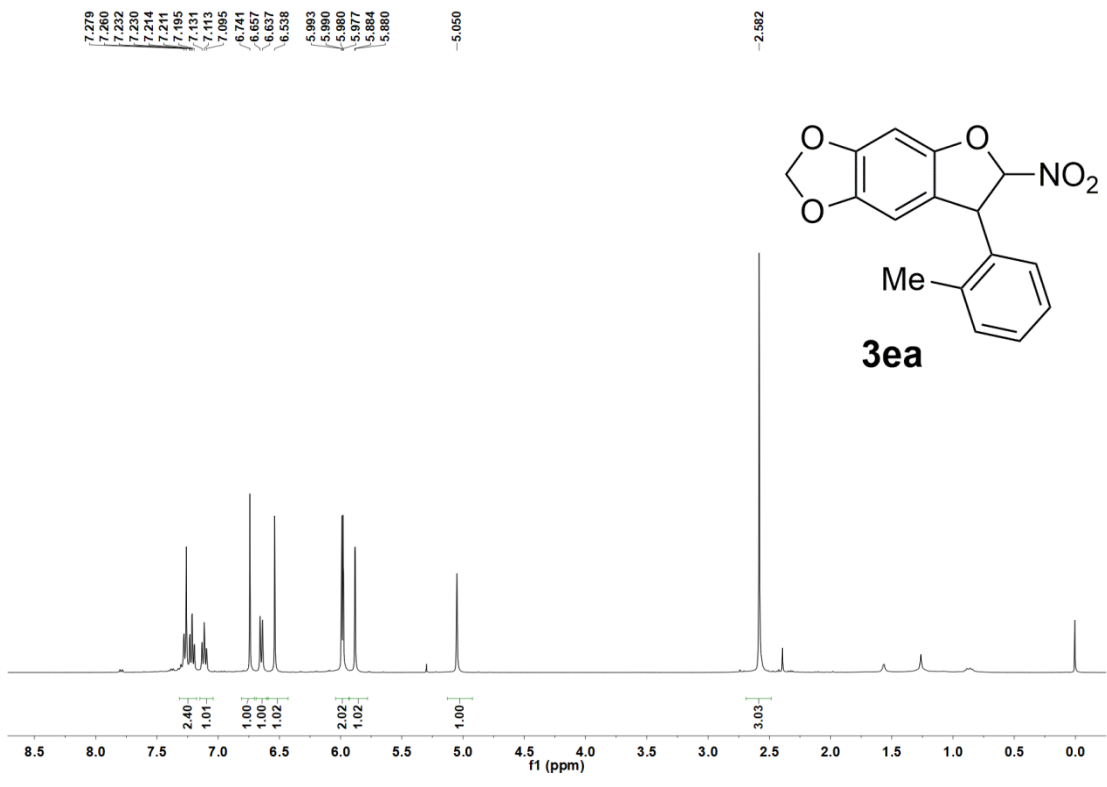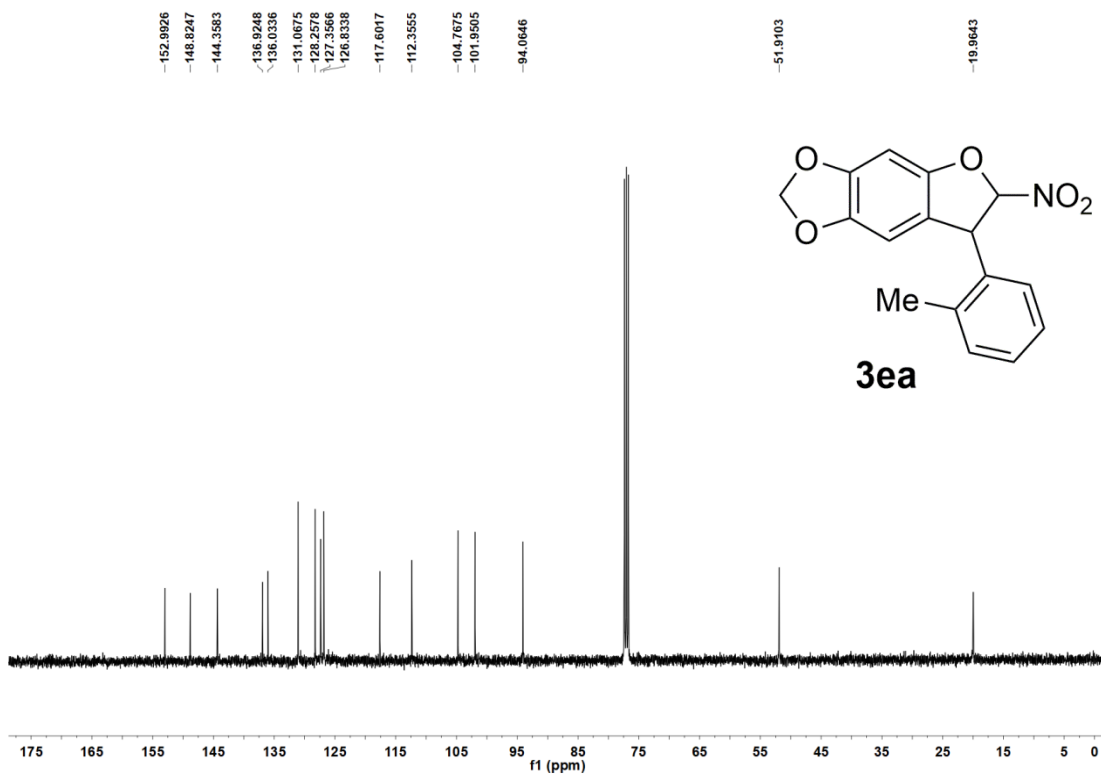

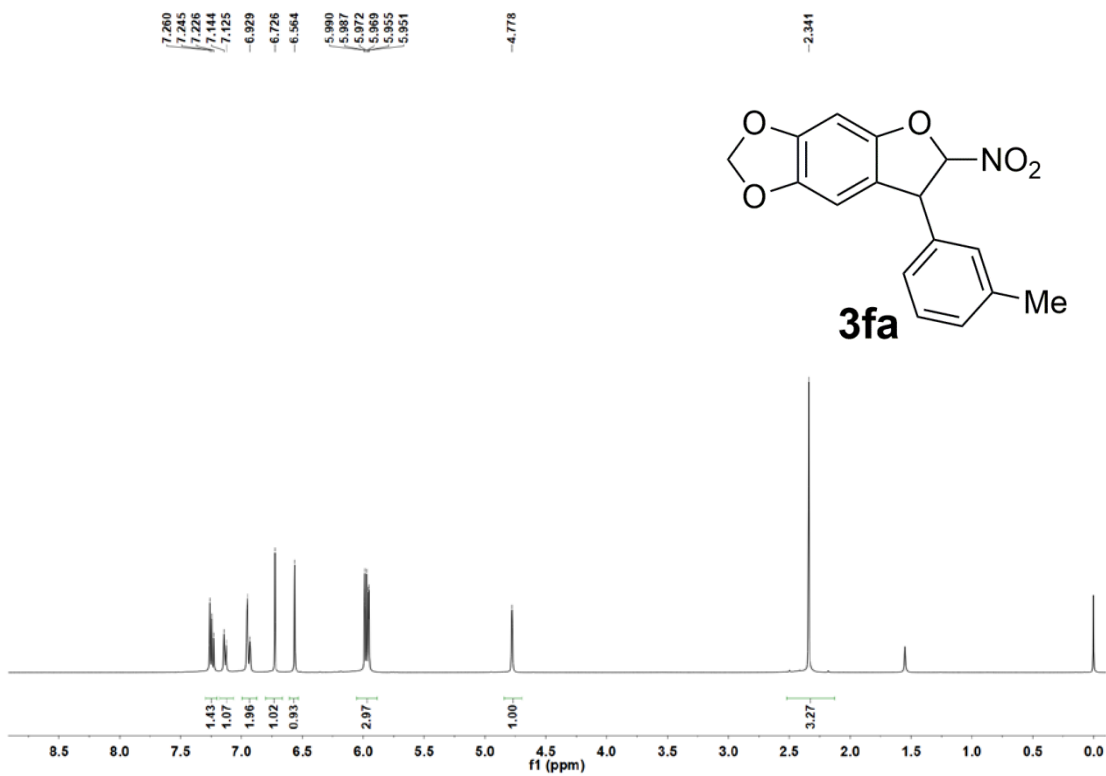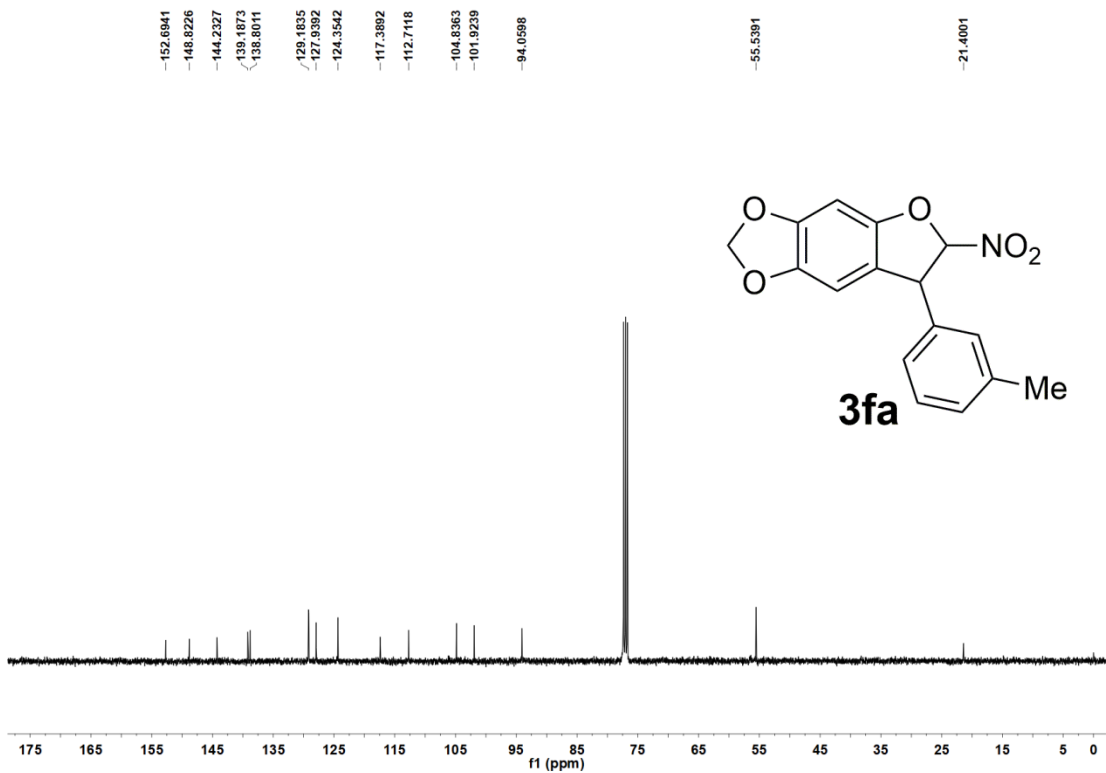

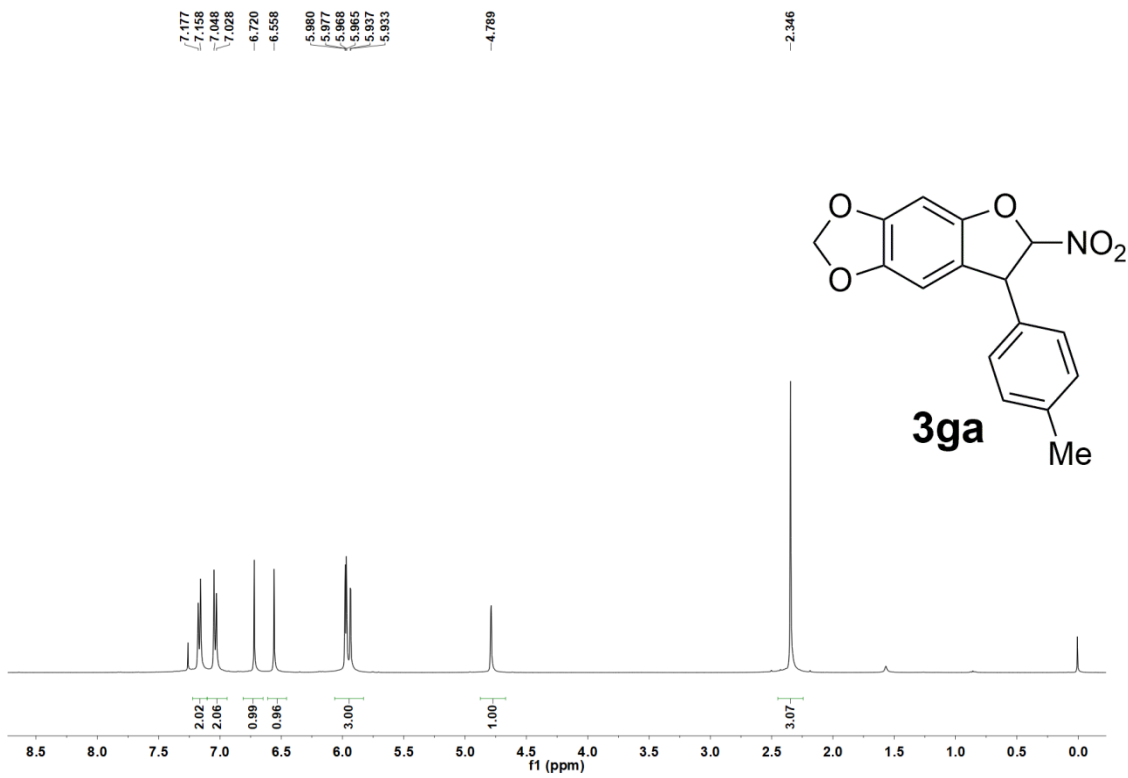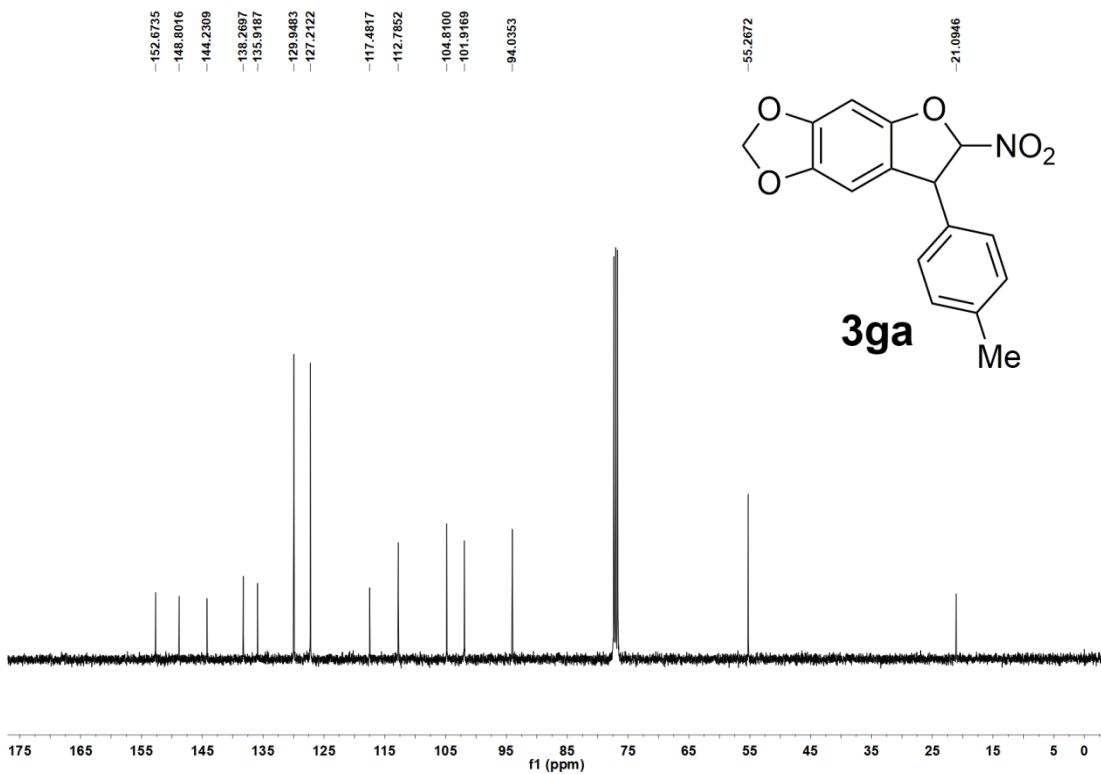

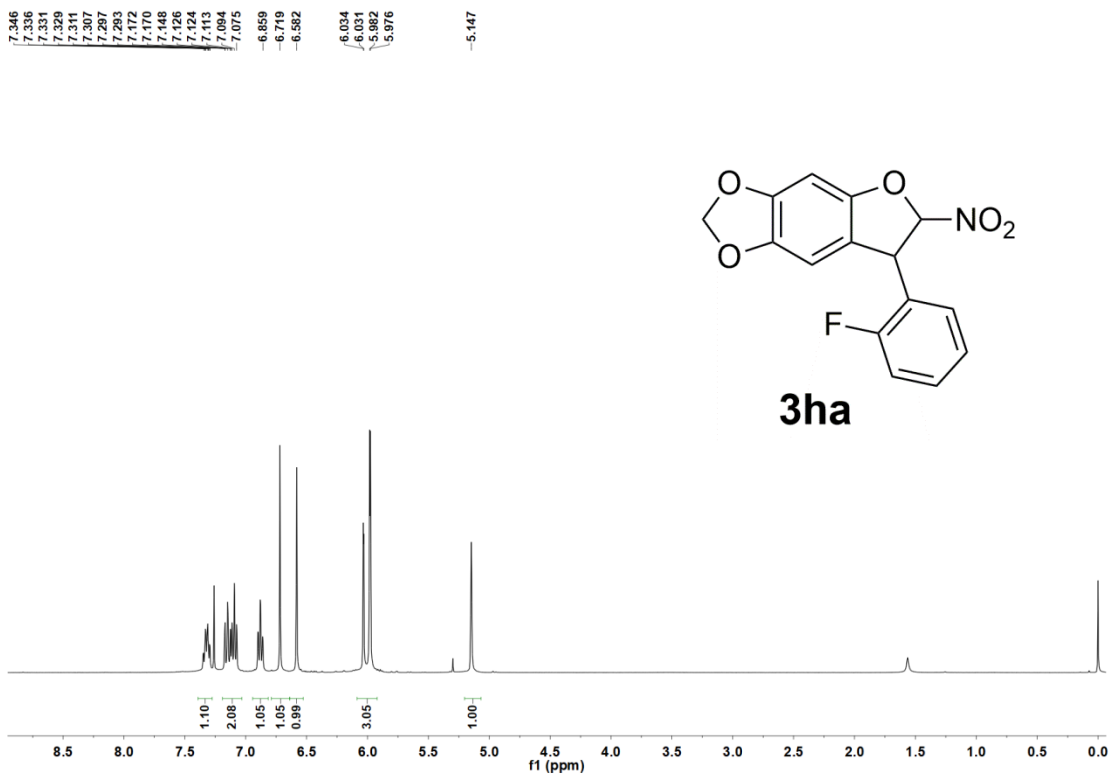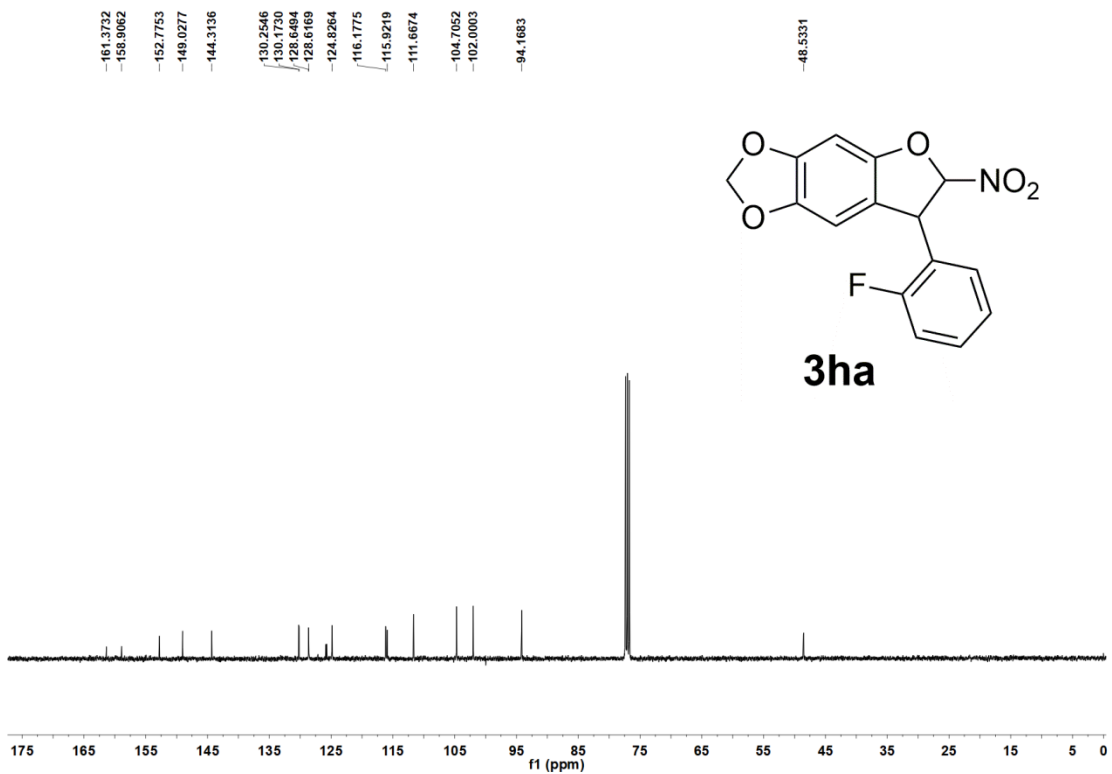

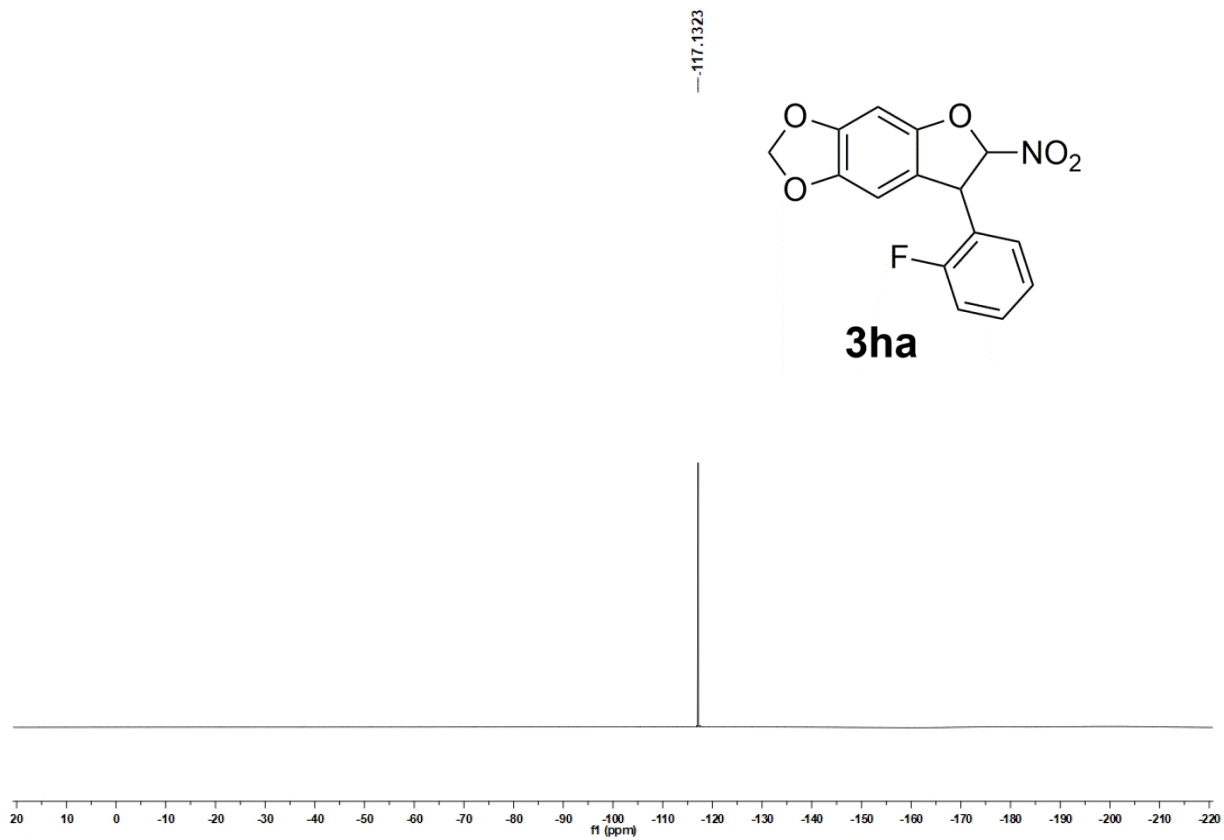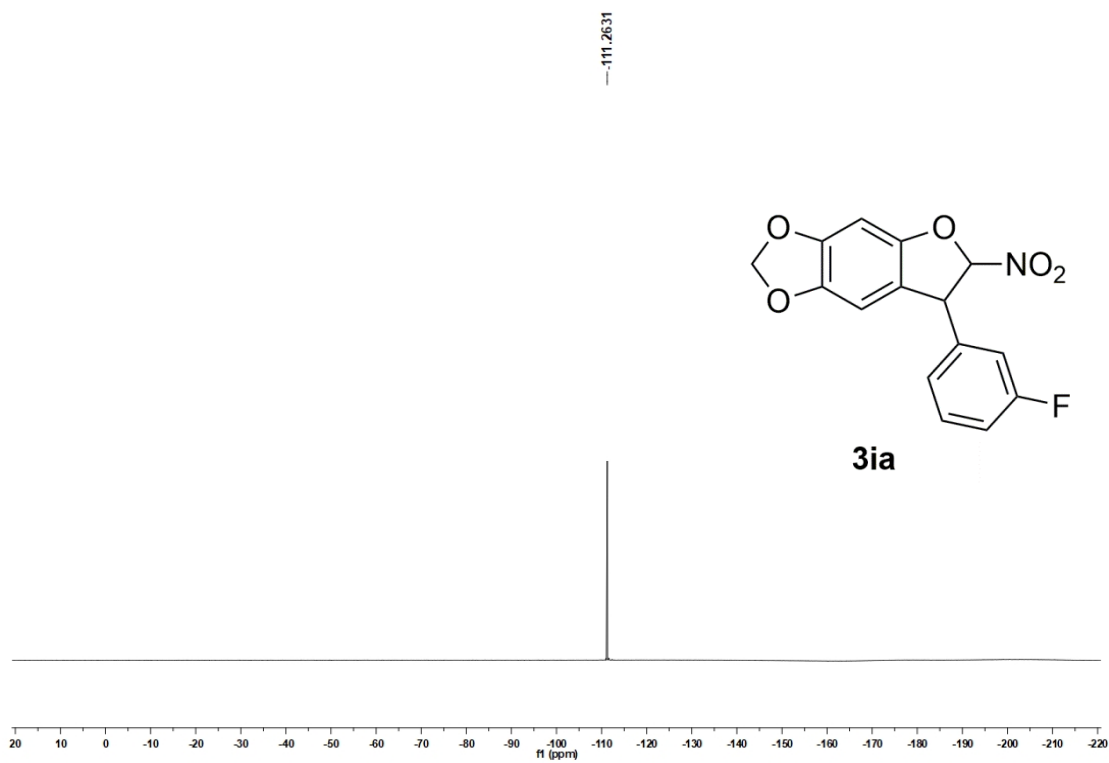



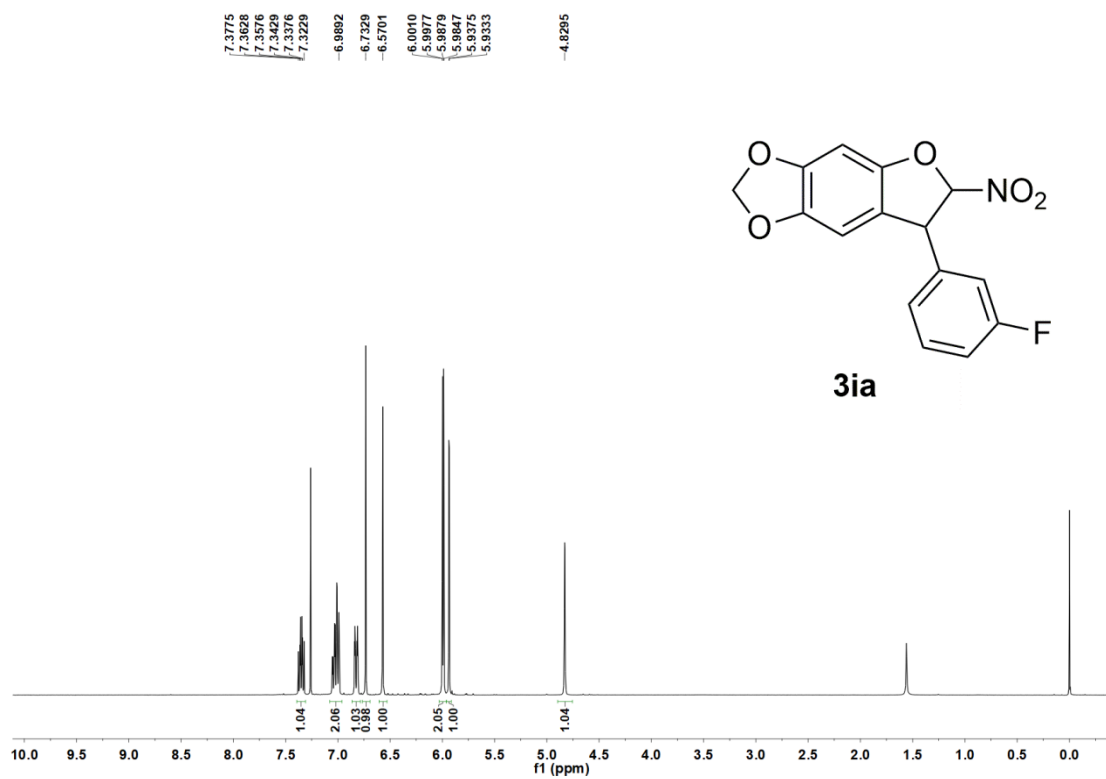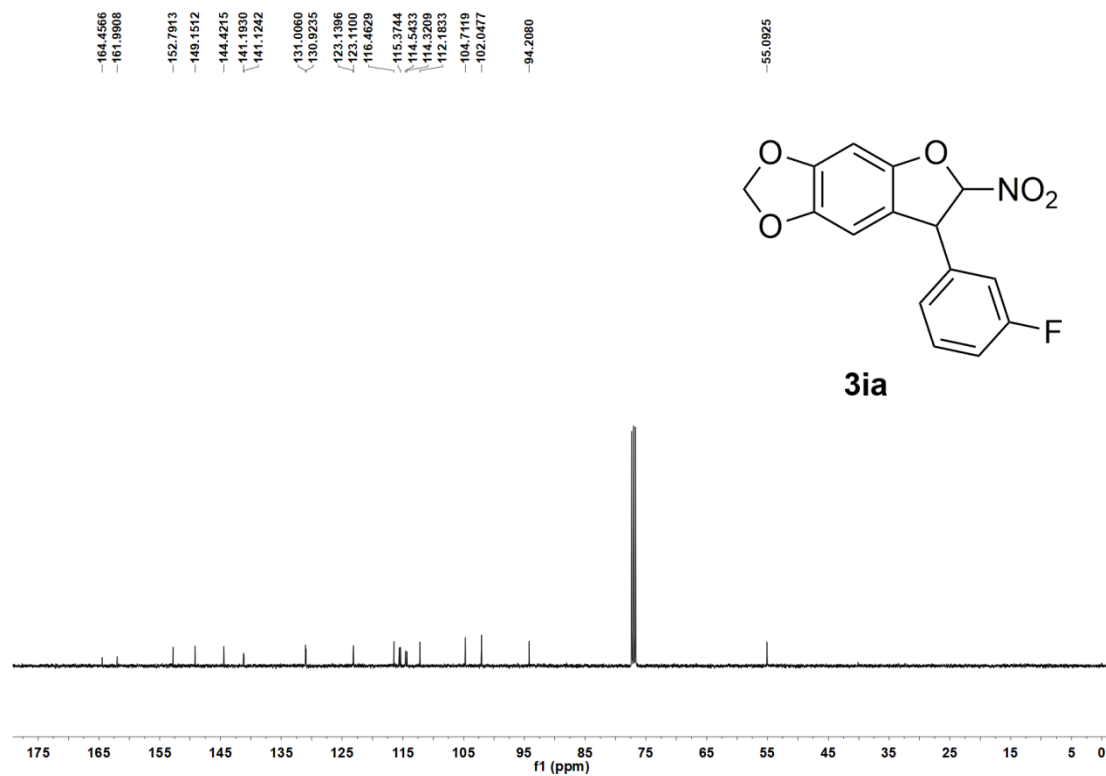

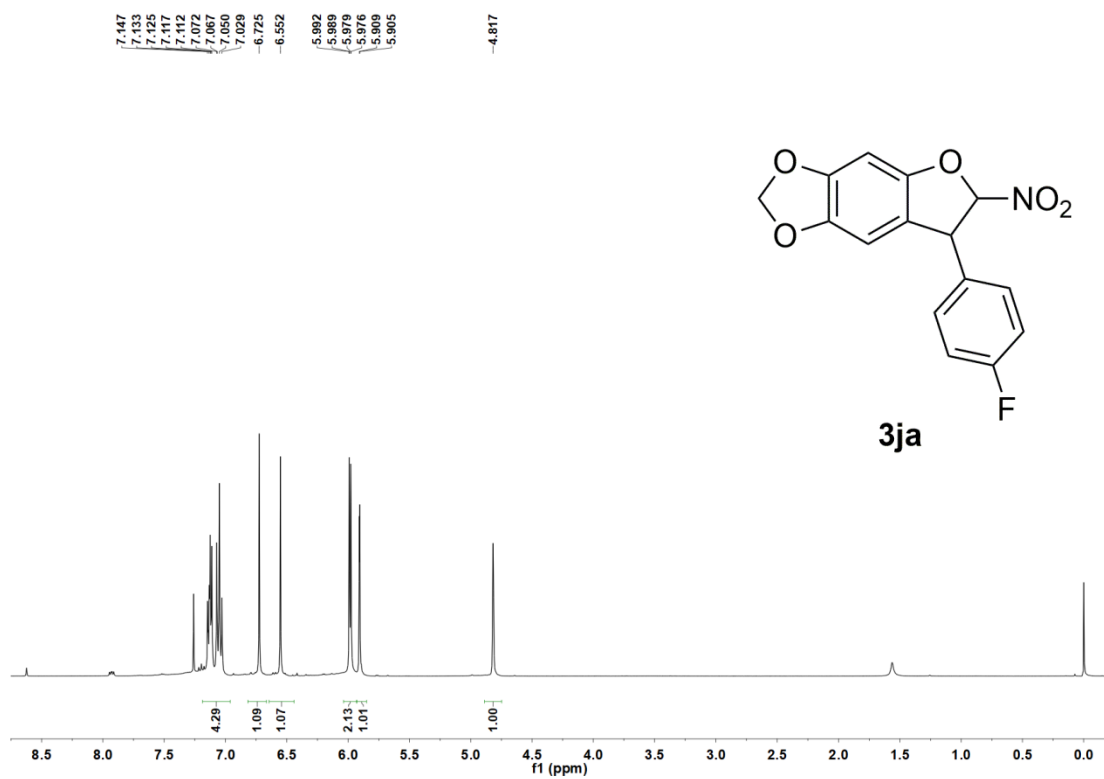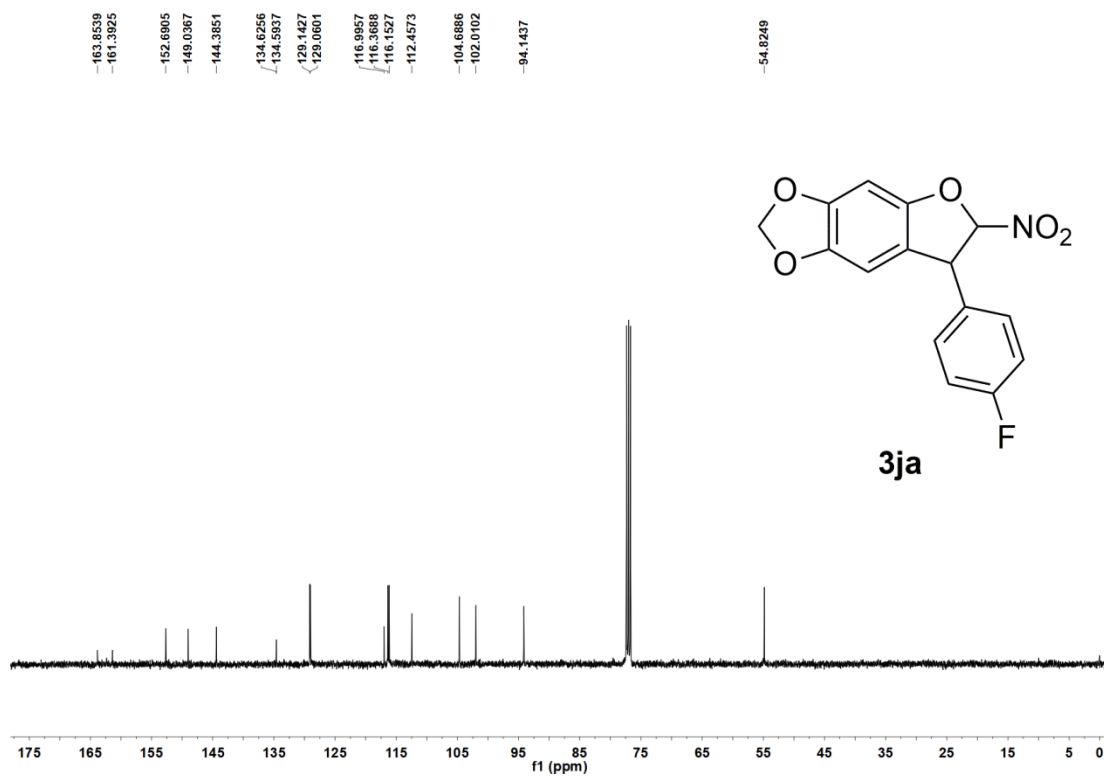

—113.3415

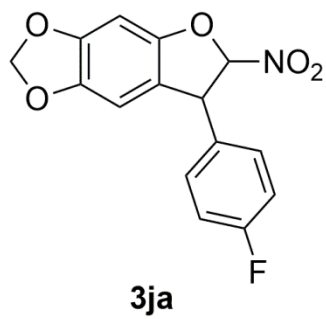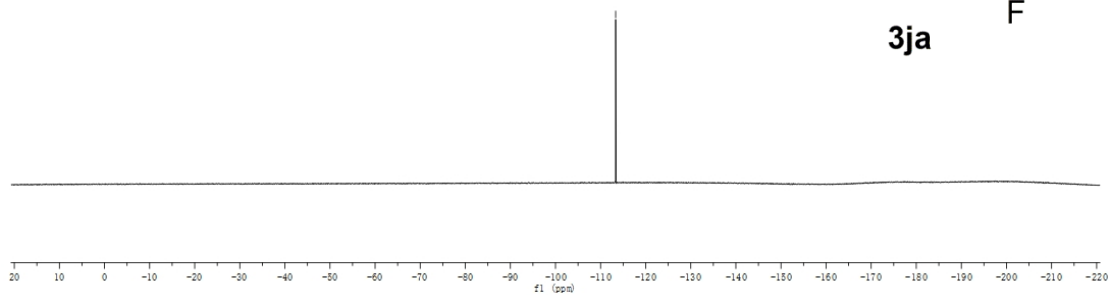

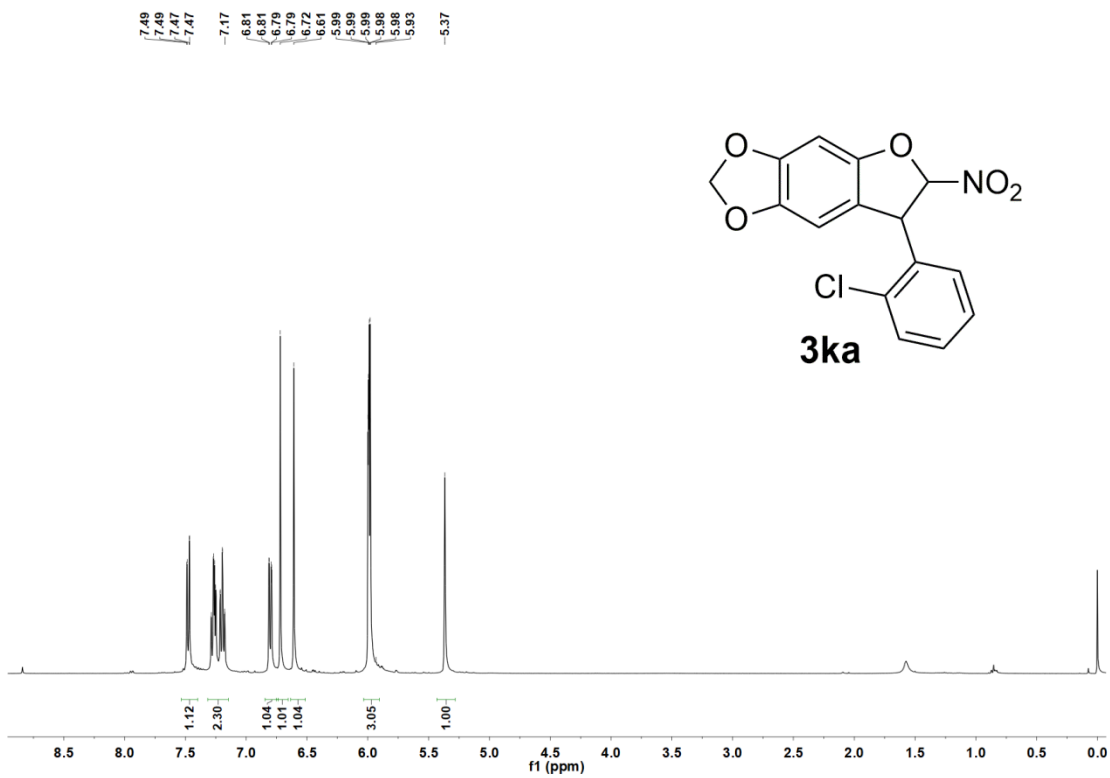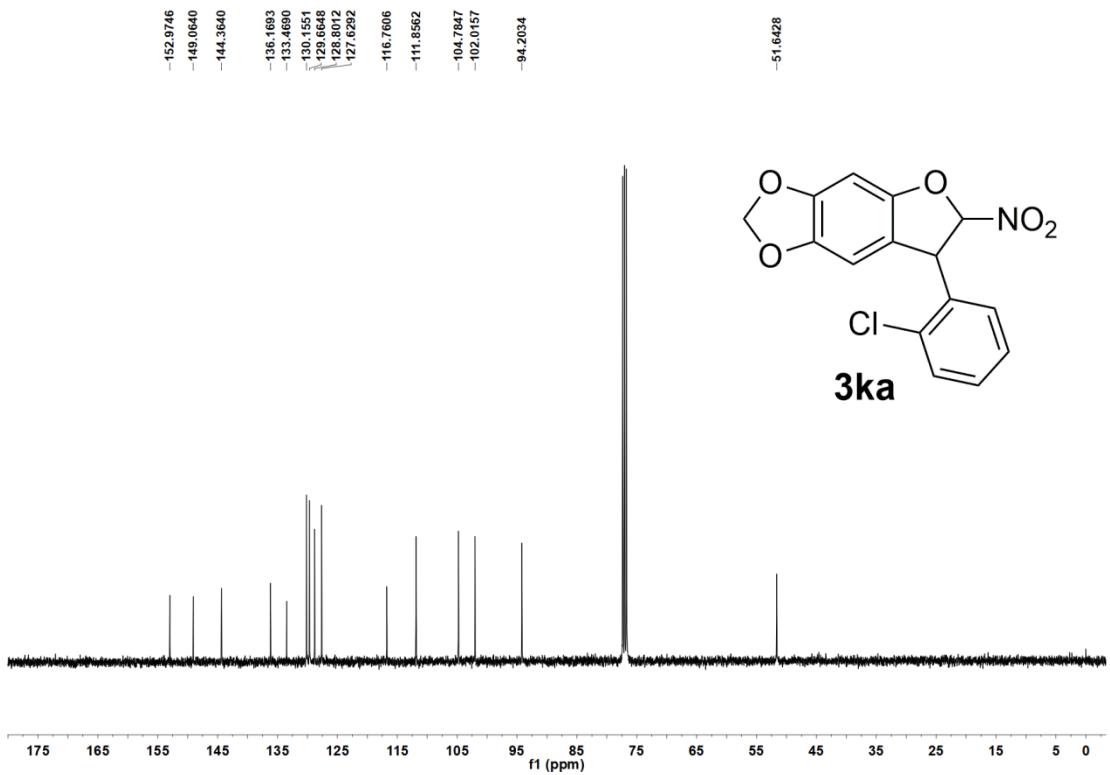

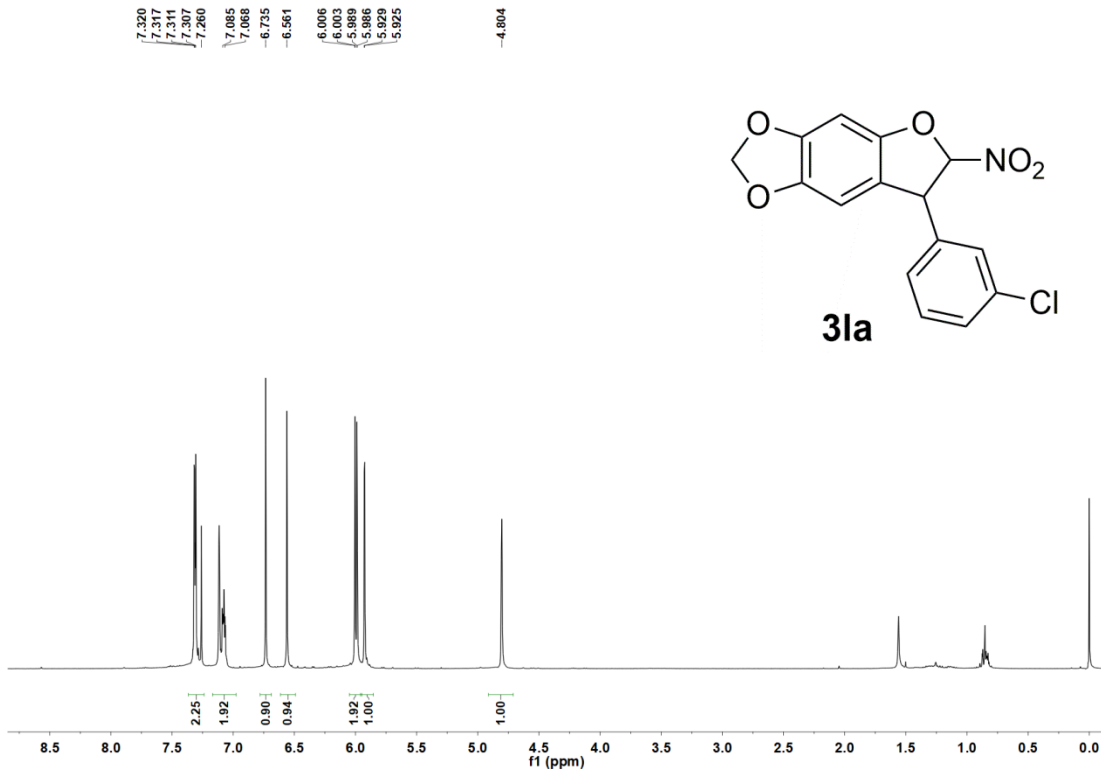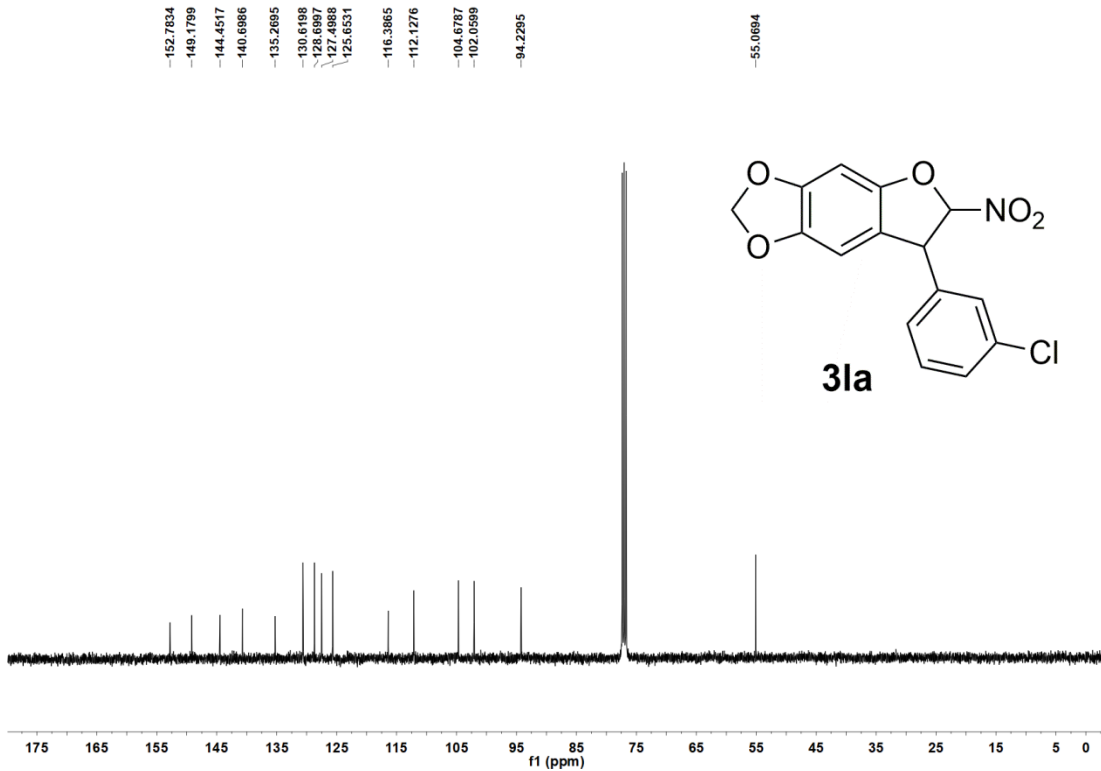

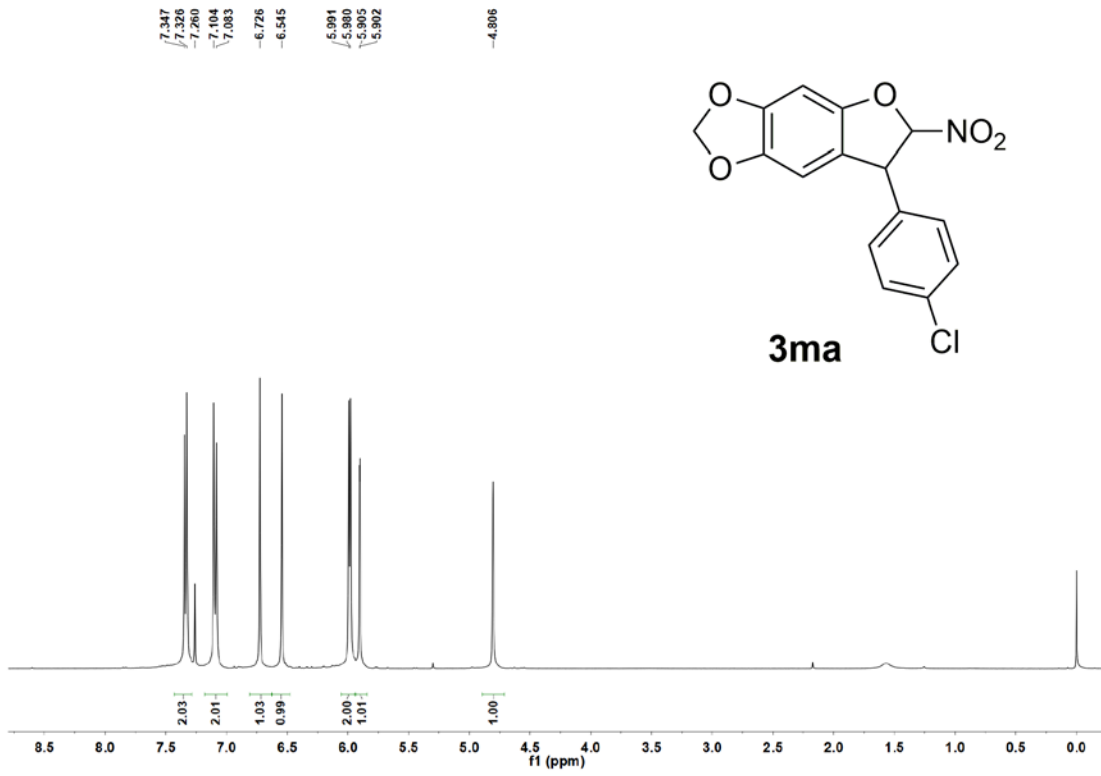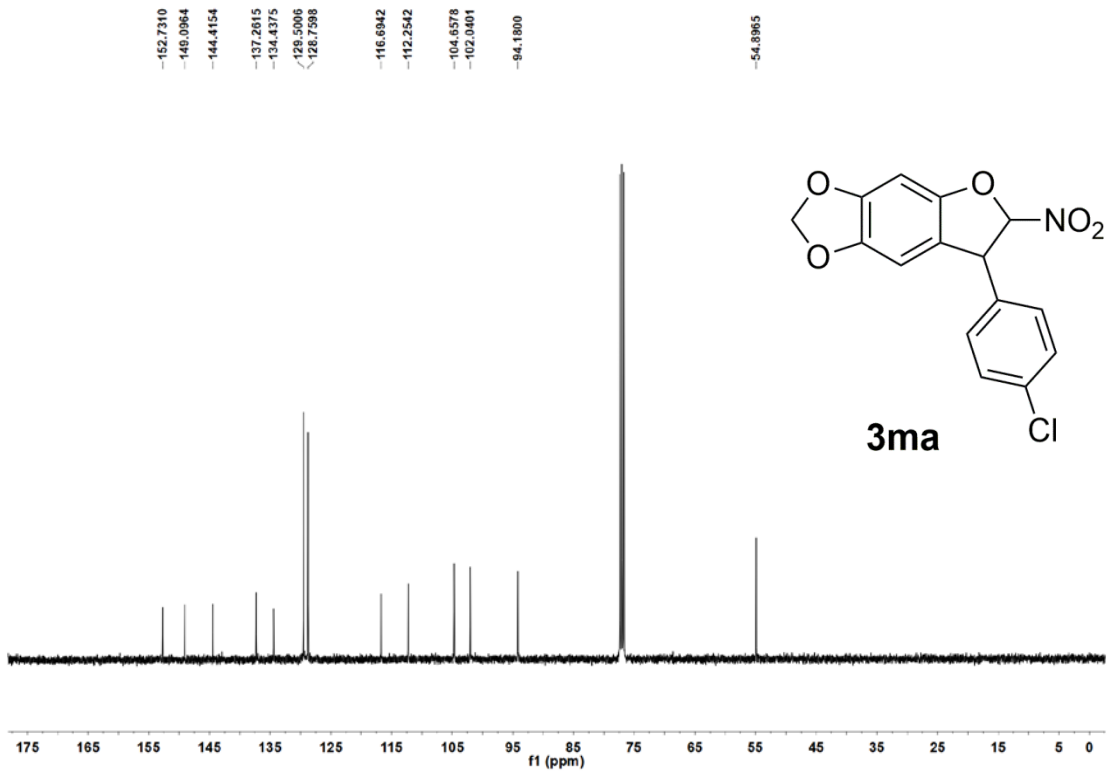

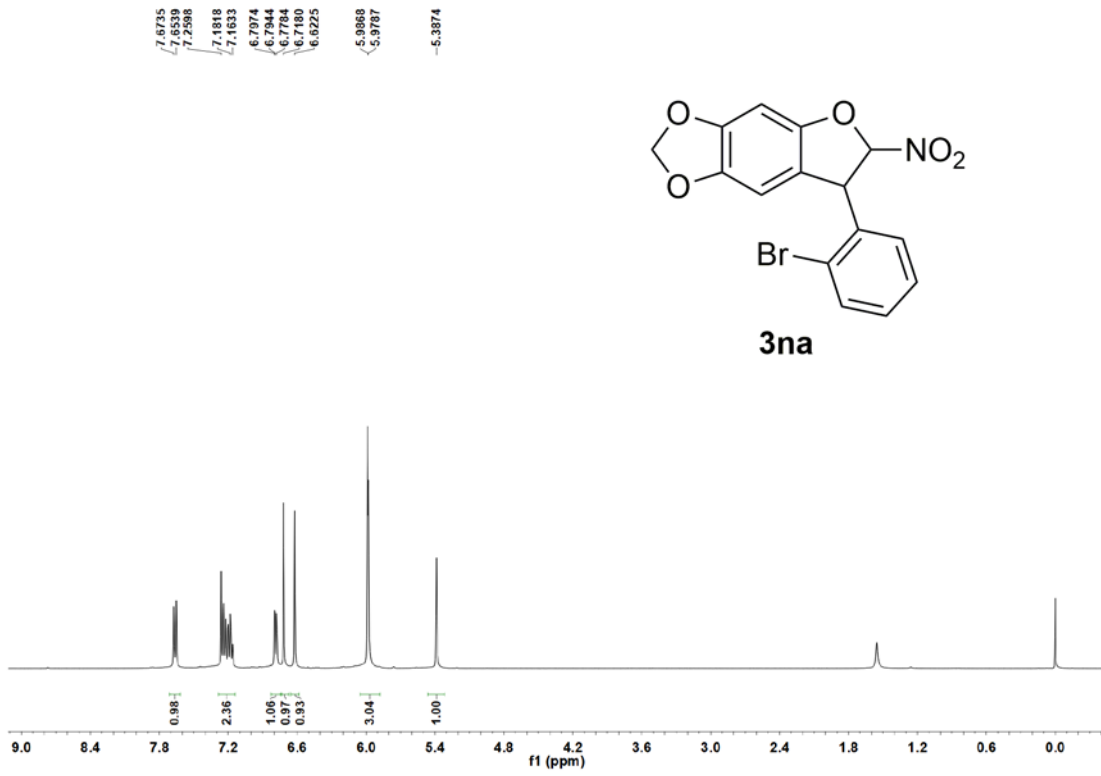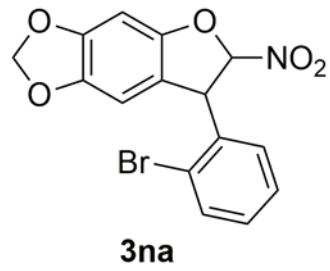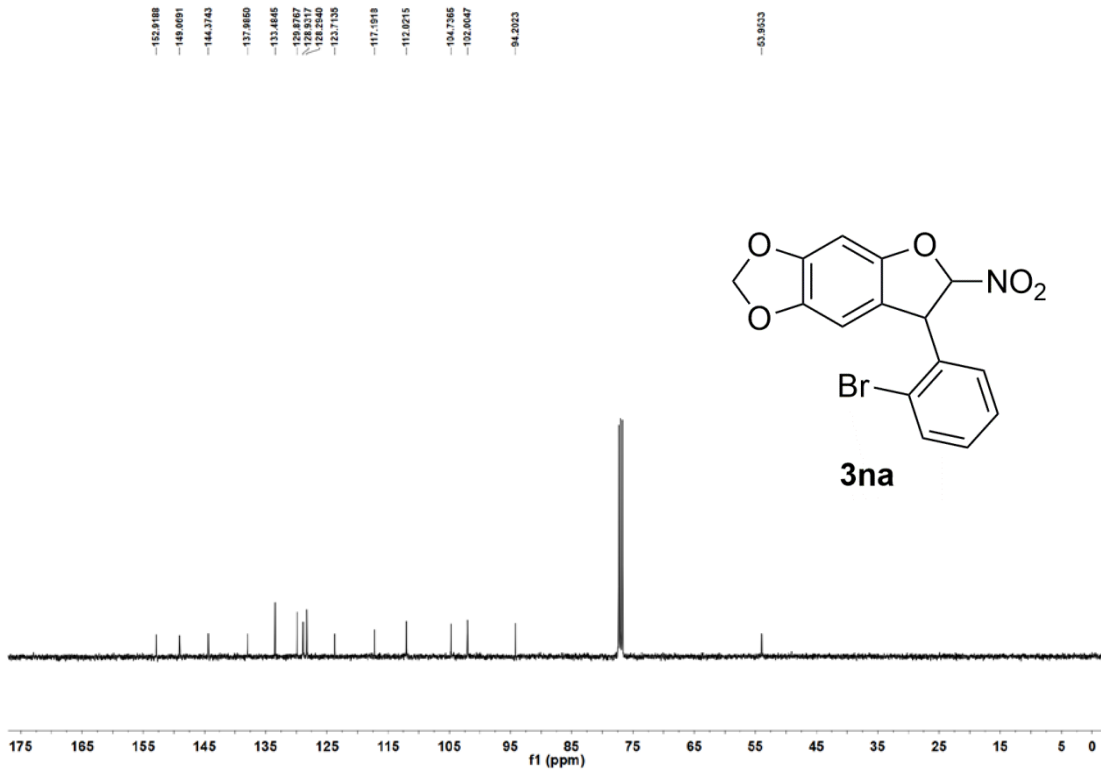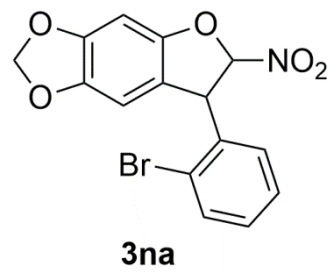

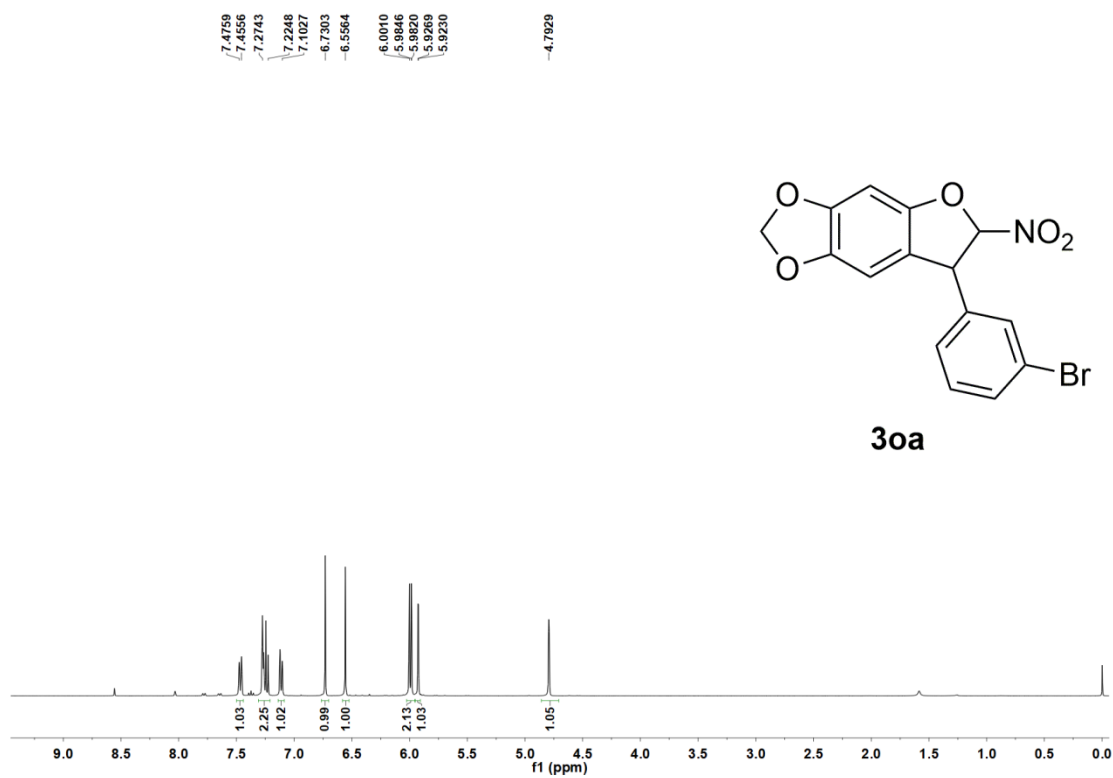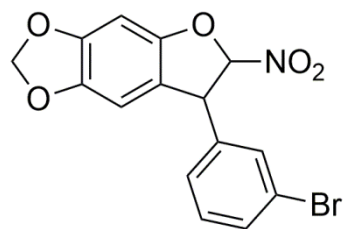

**30a**

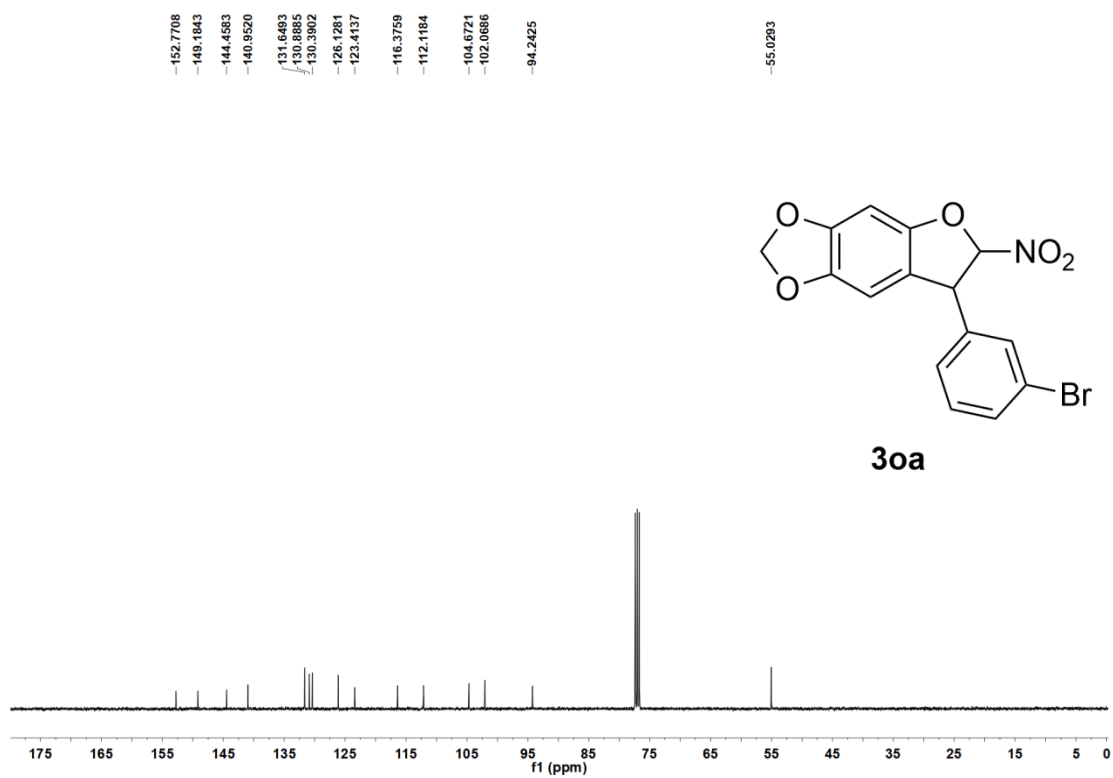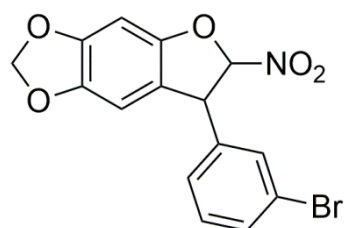

**30a**



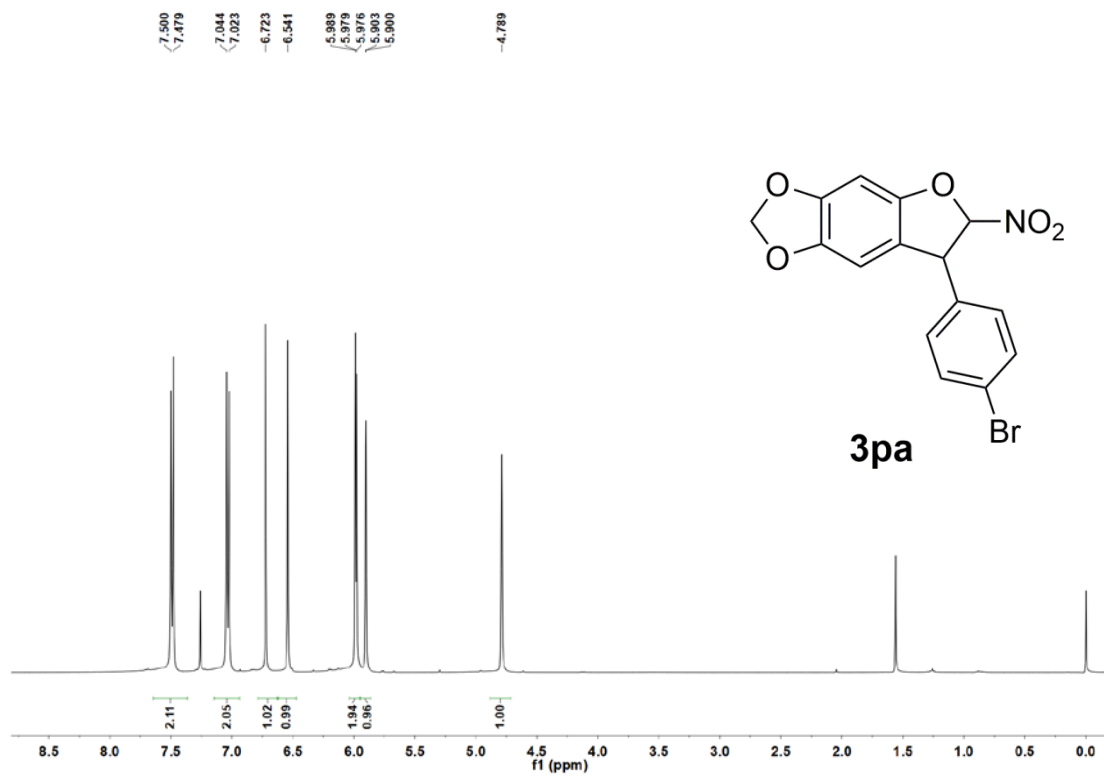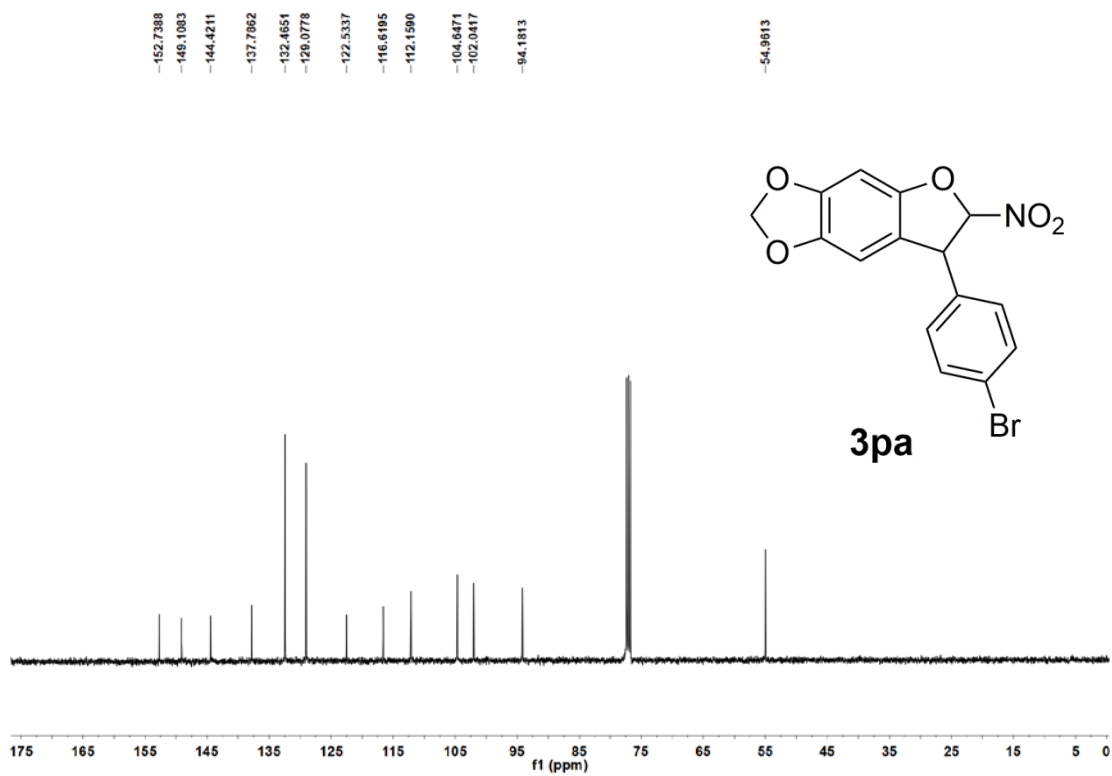

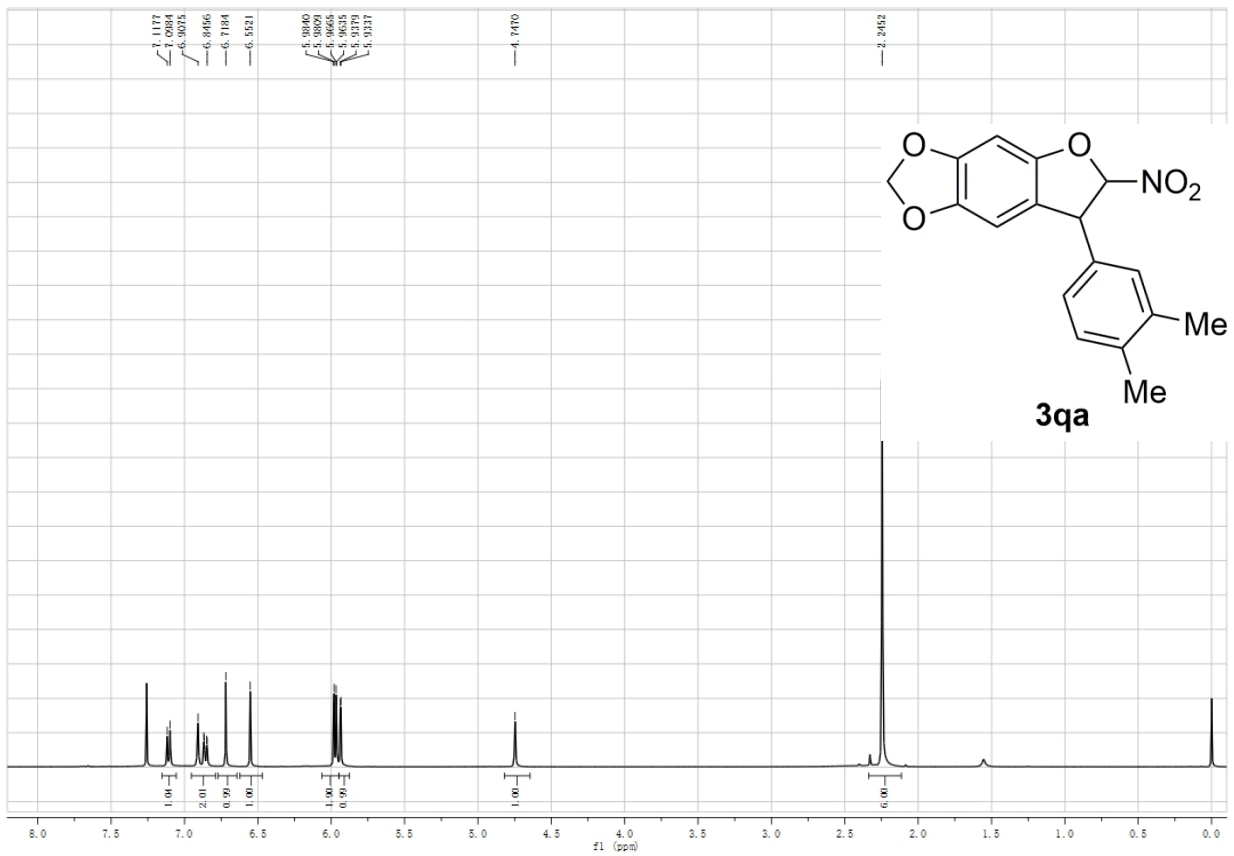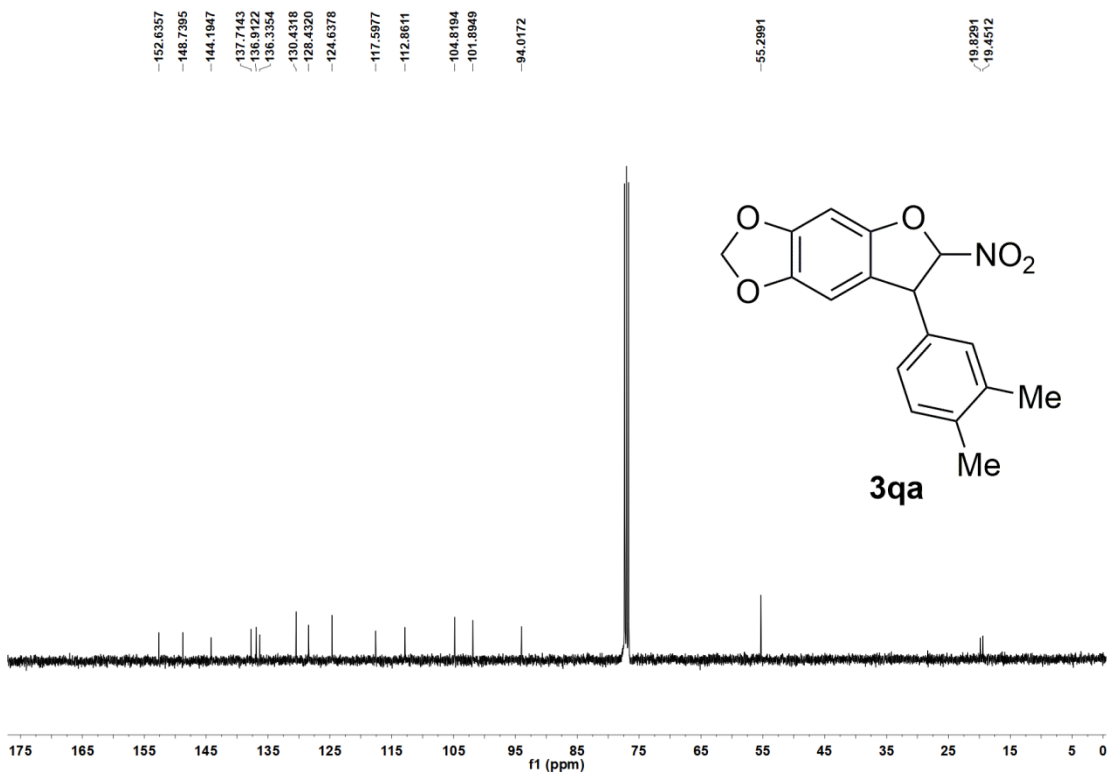

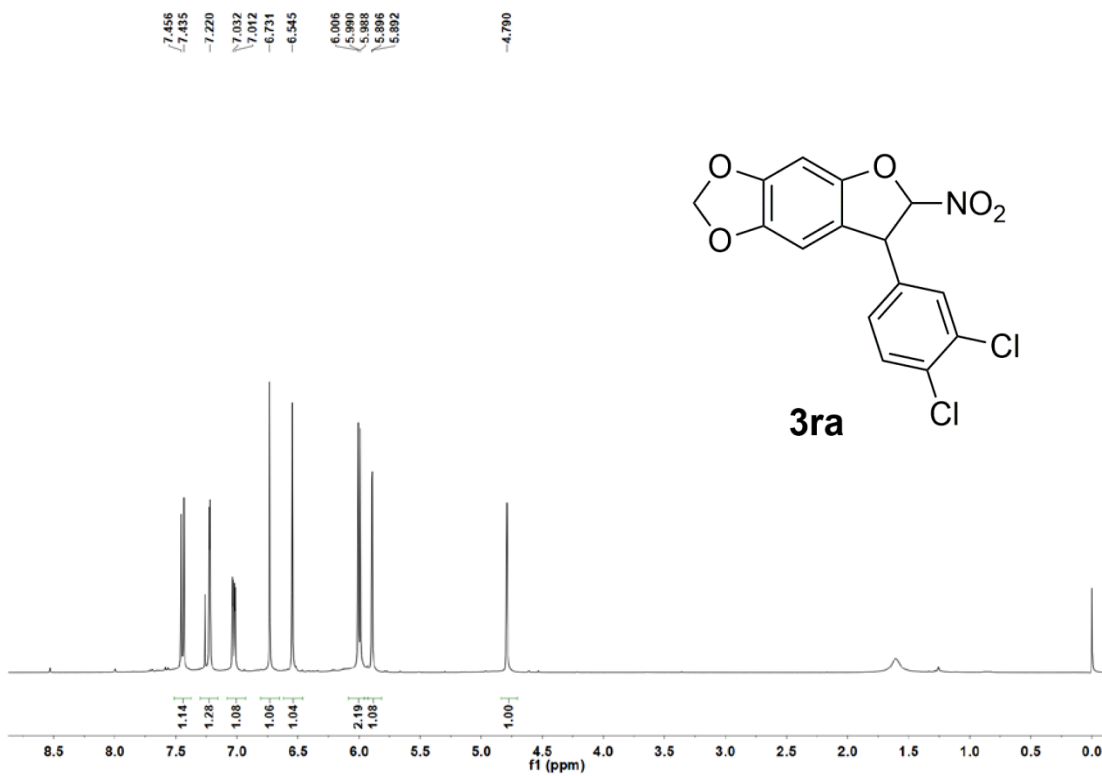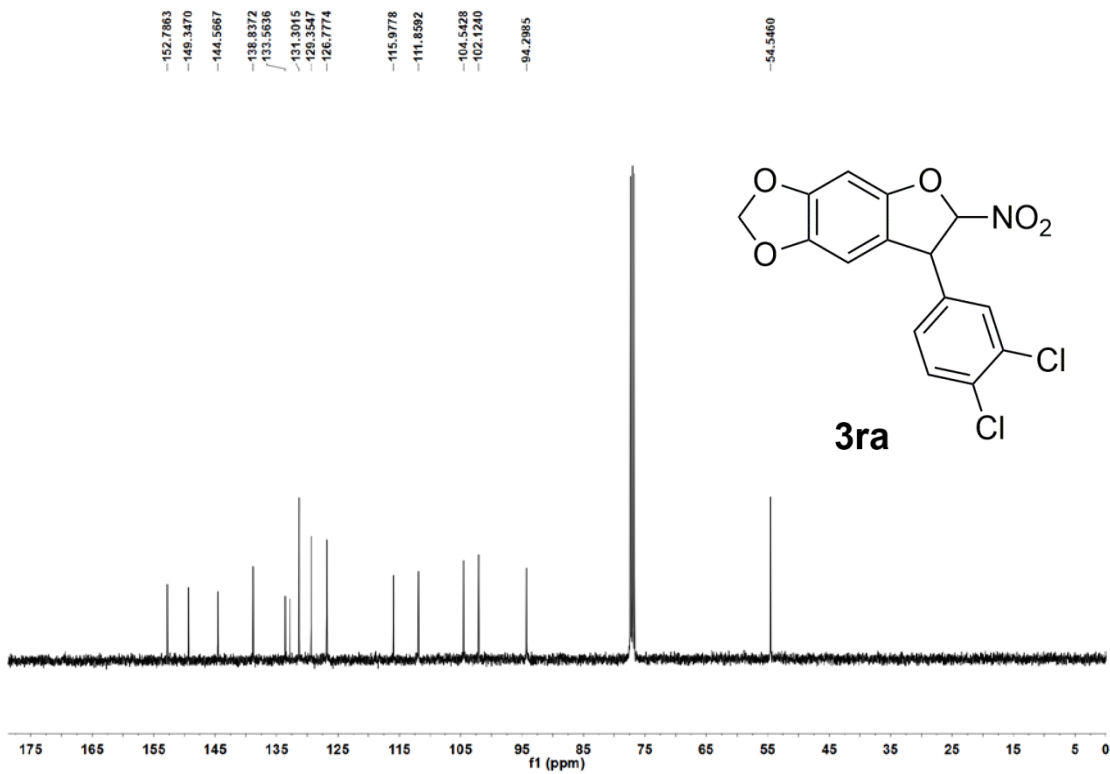

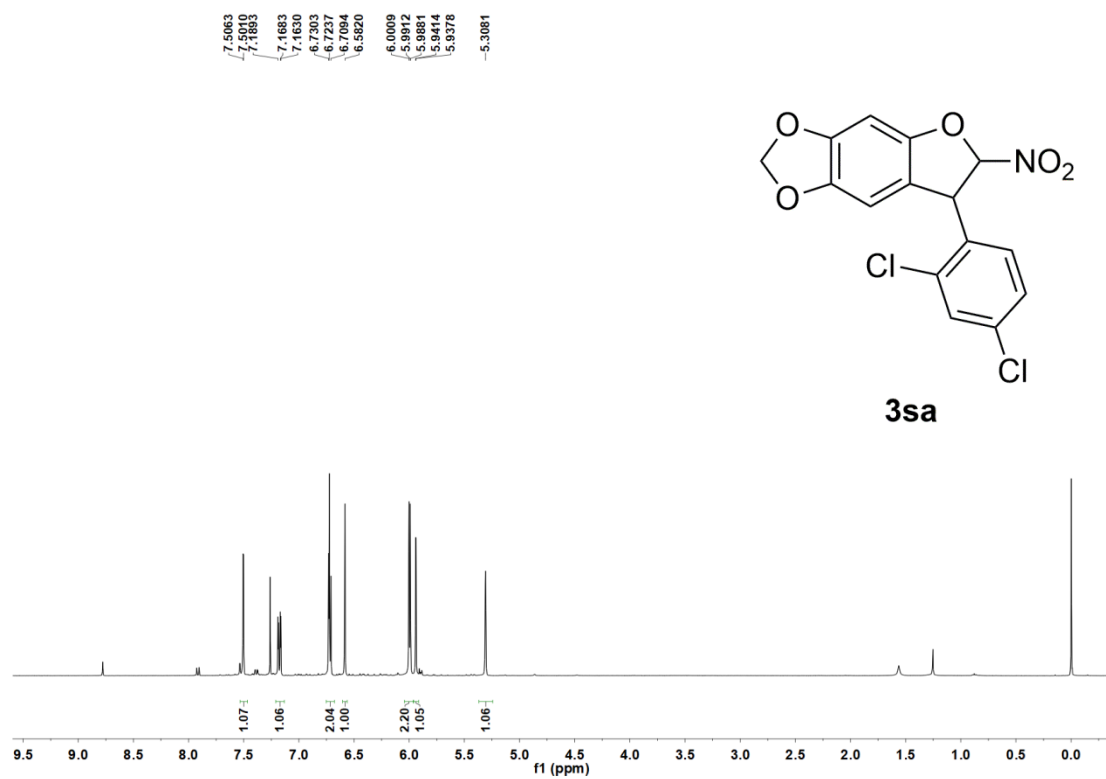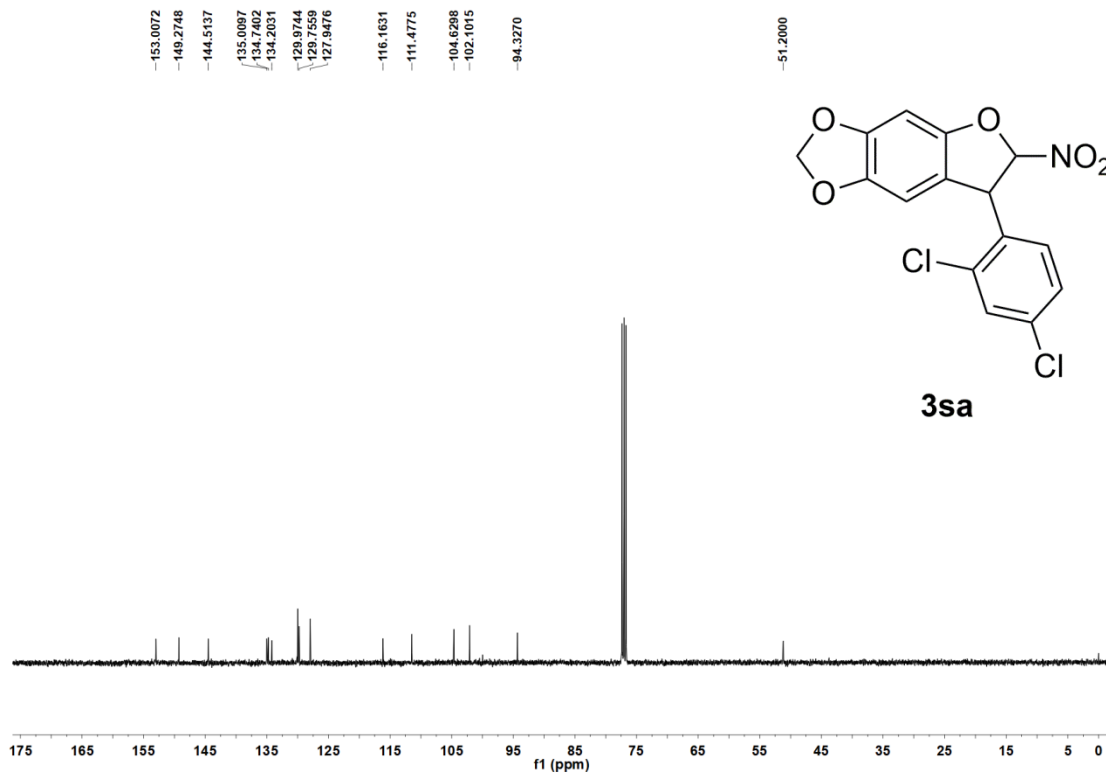

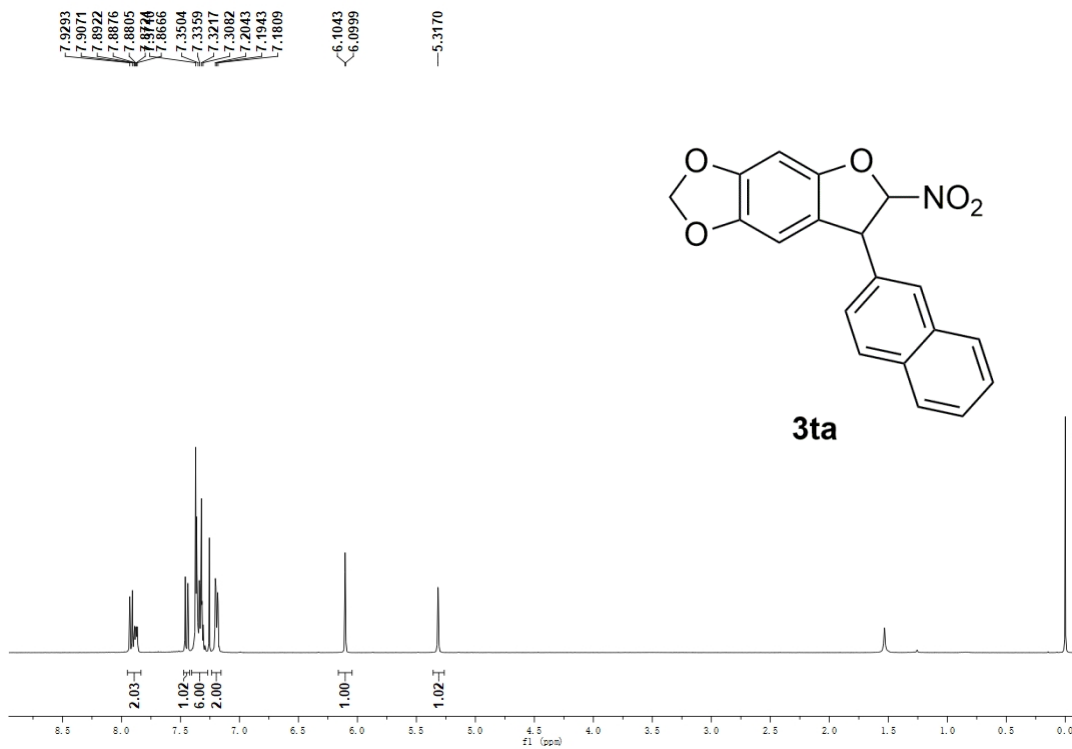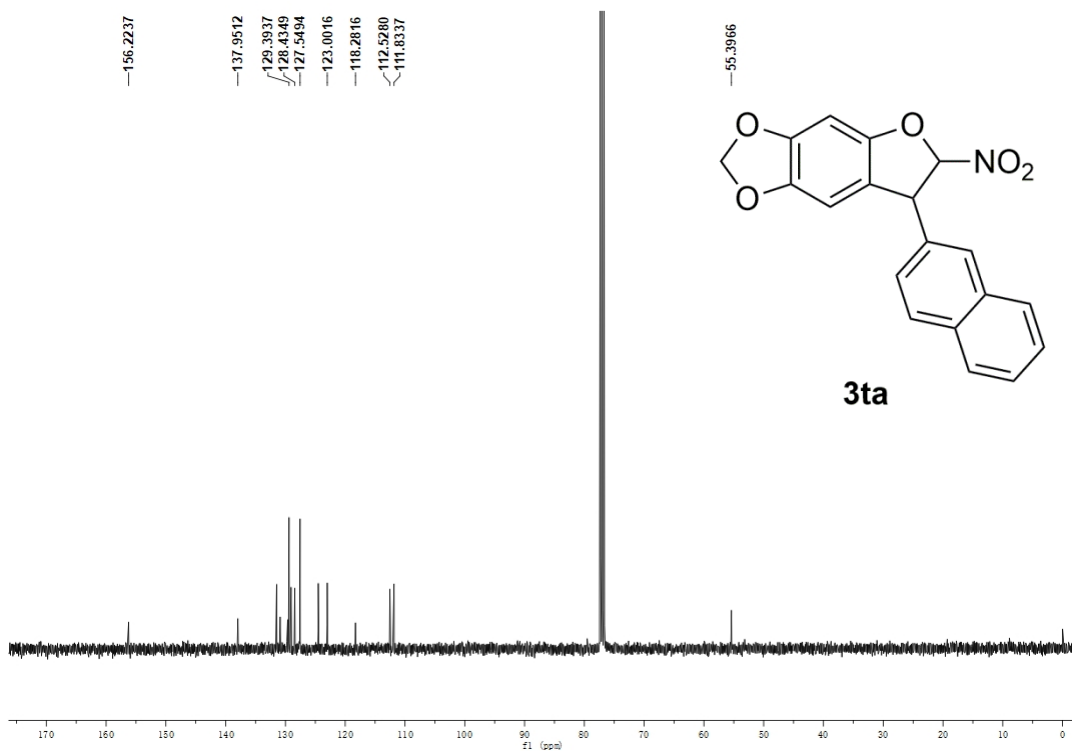

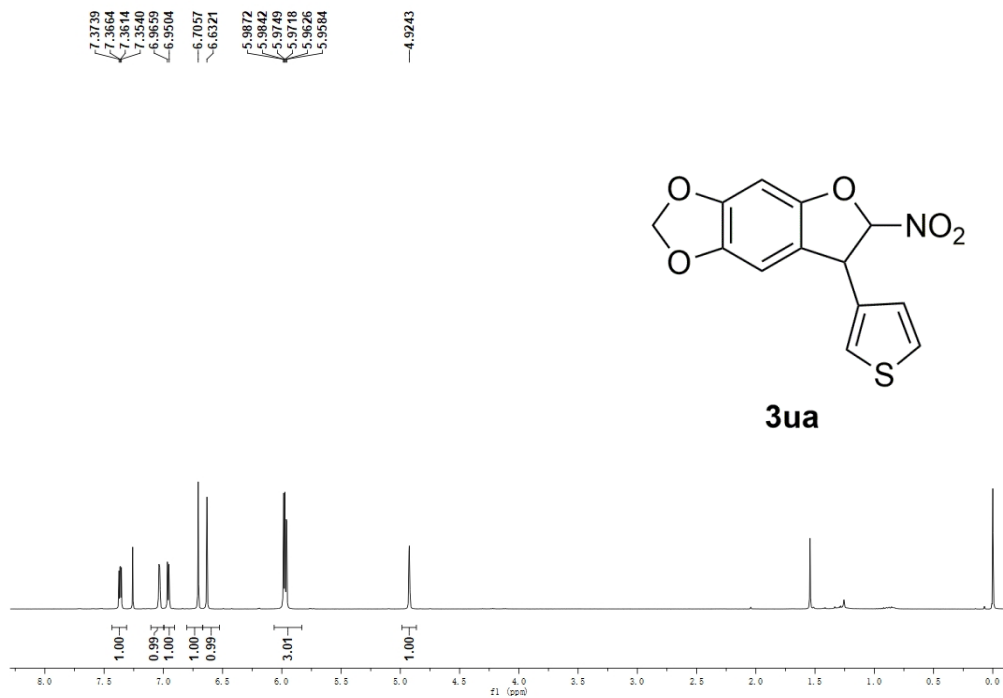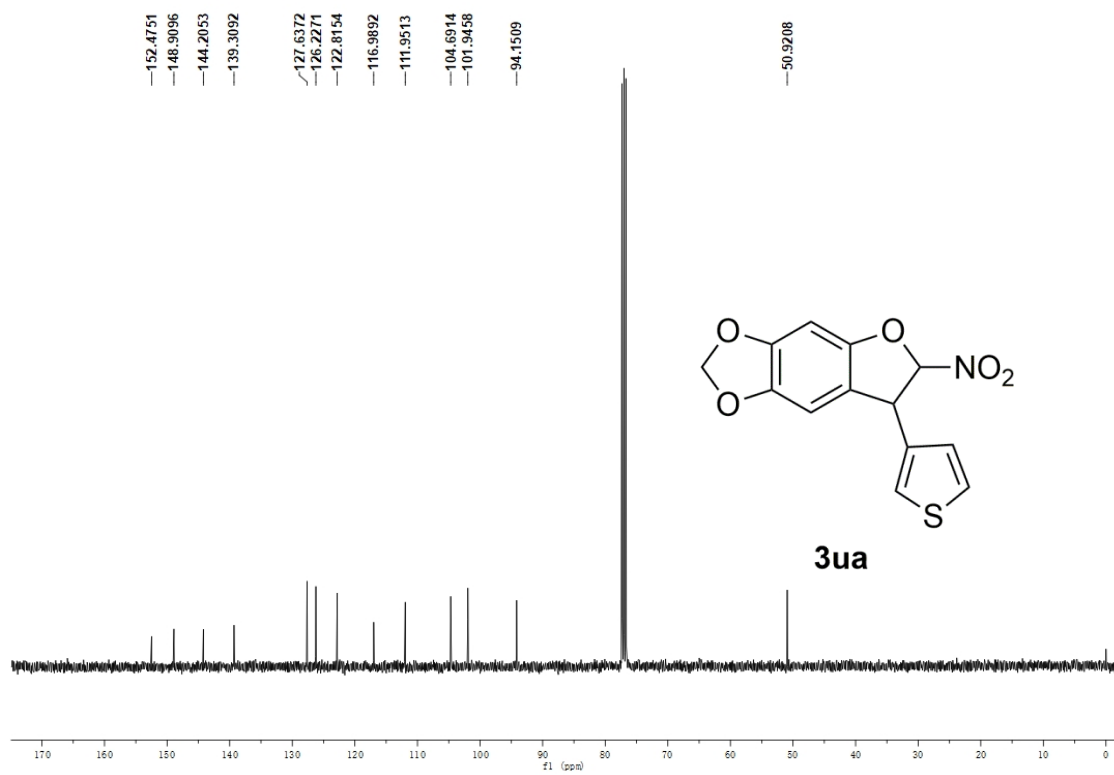

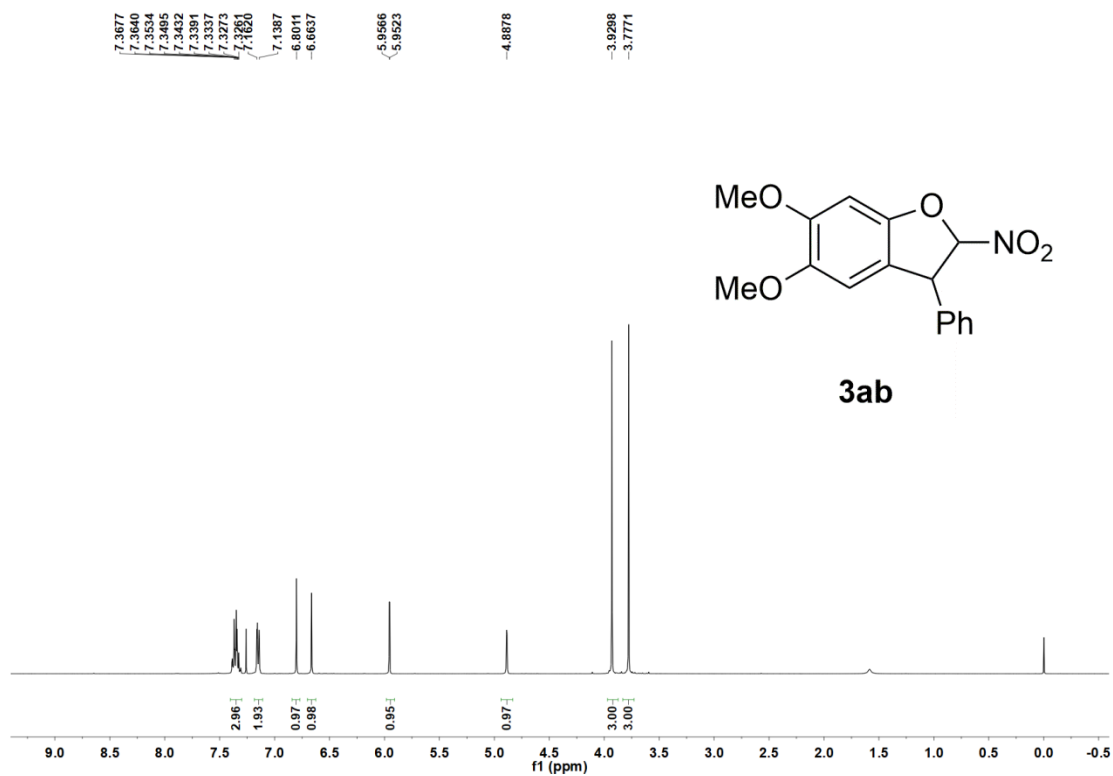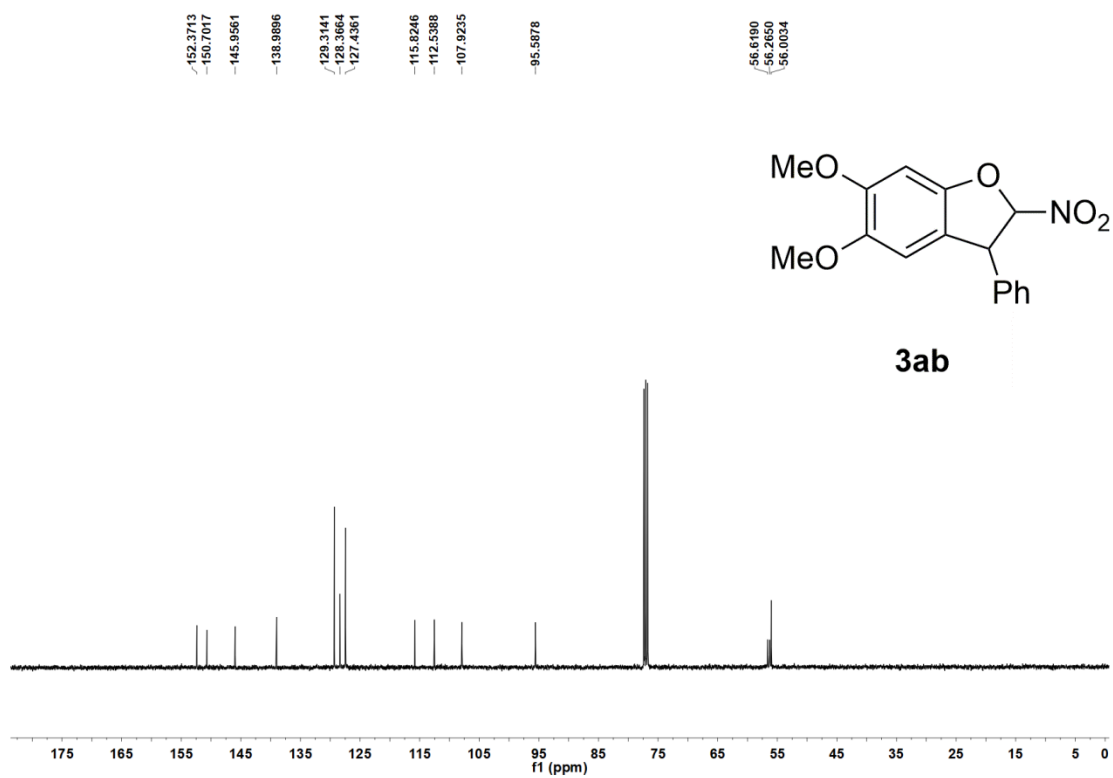

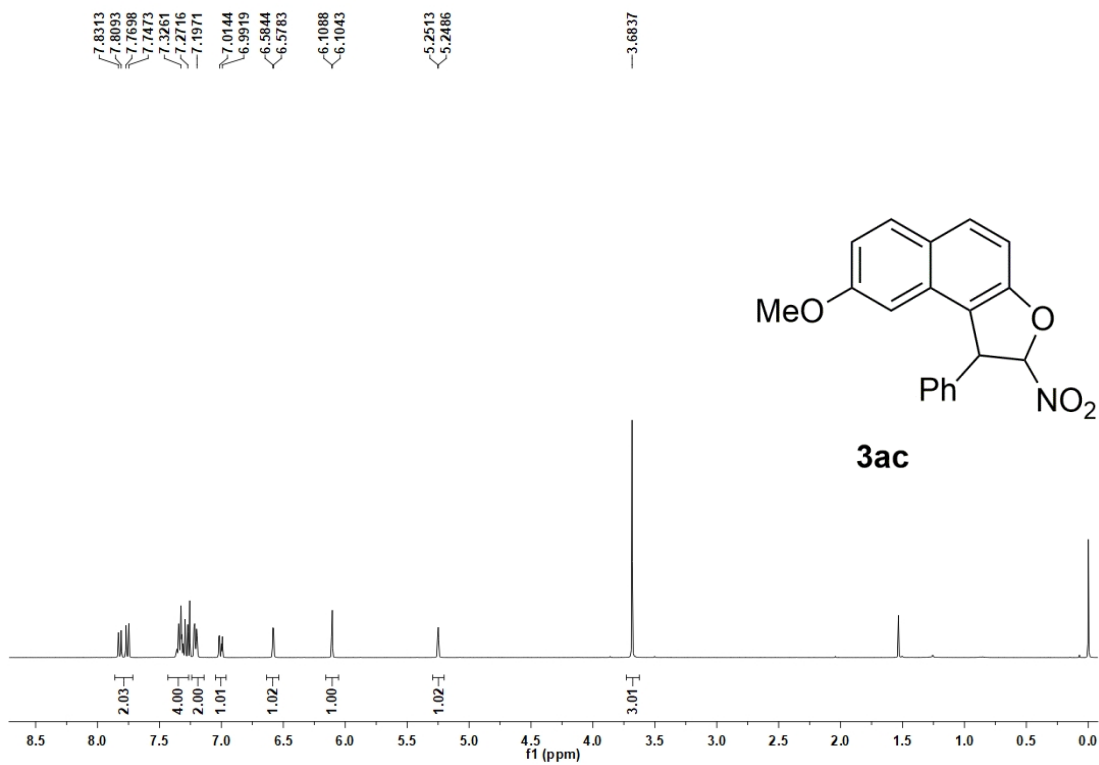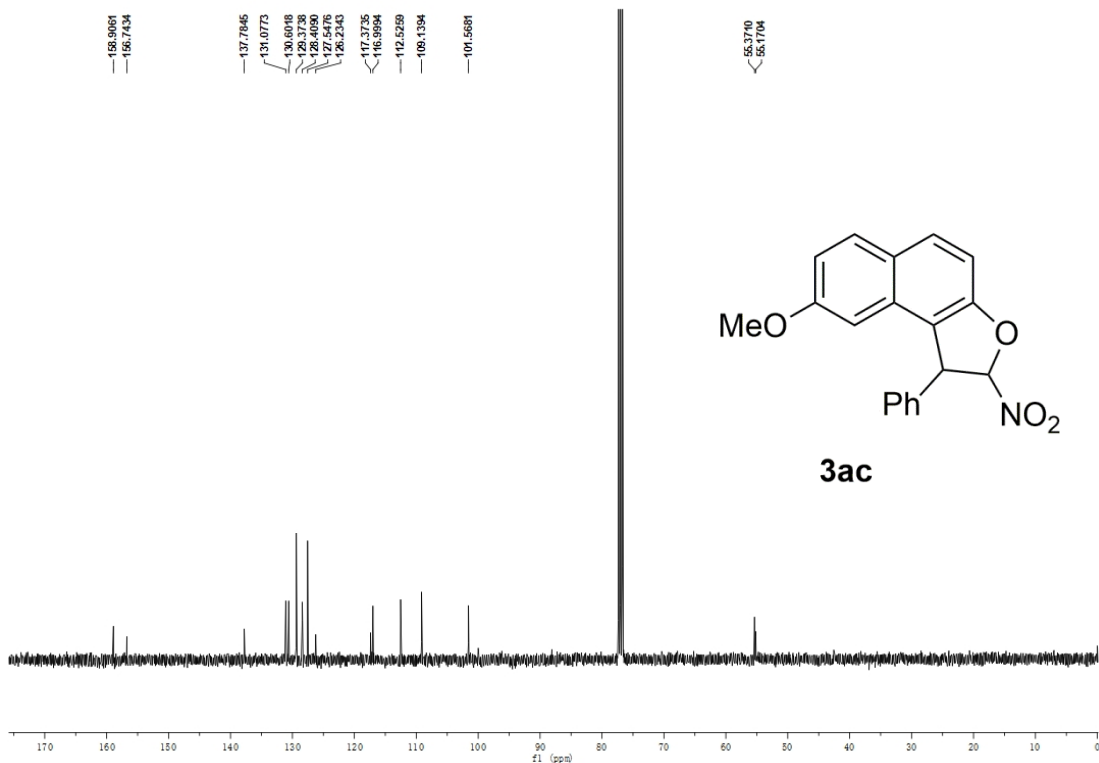



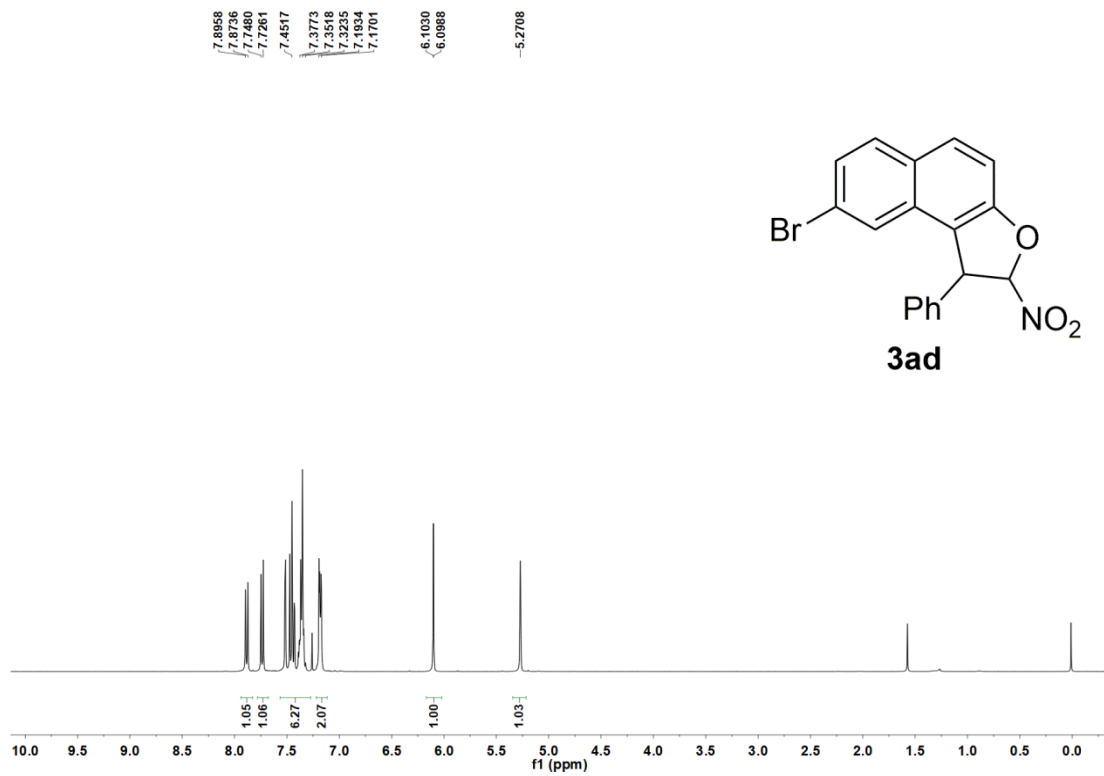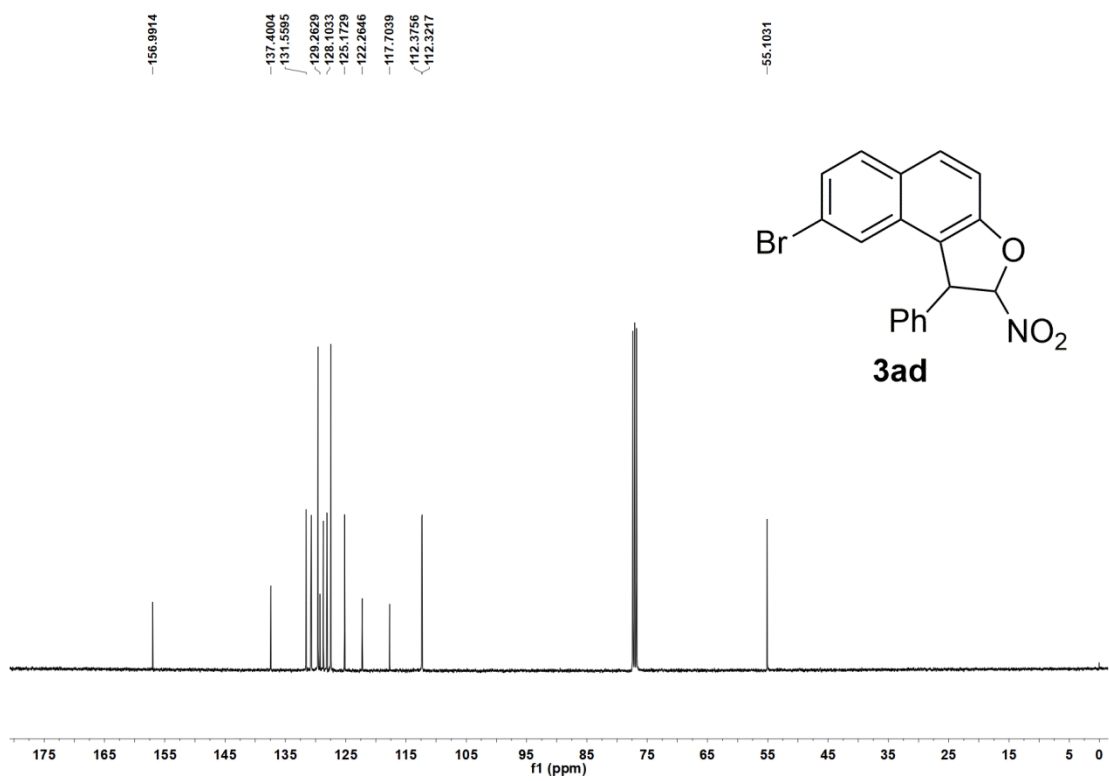

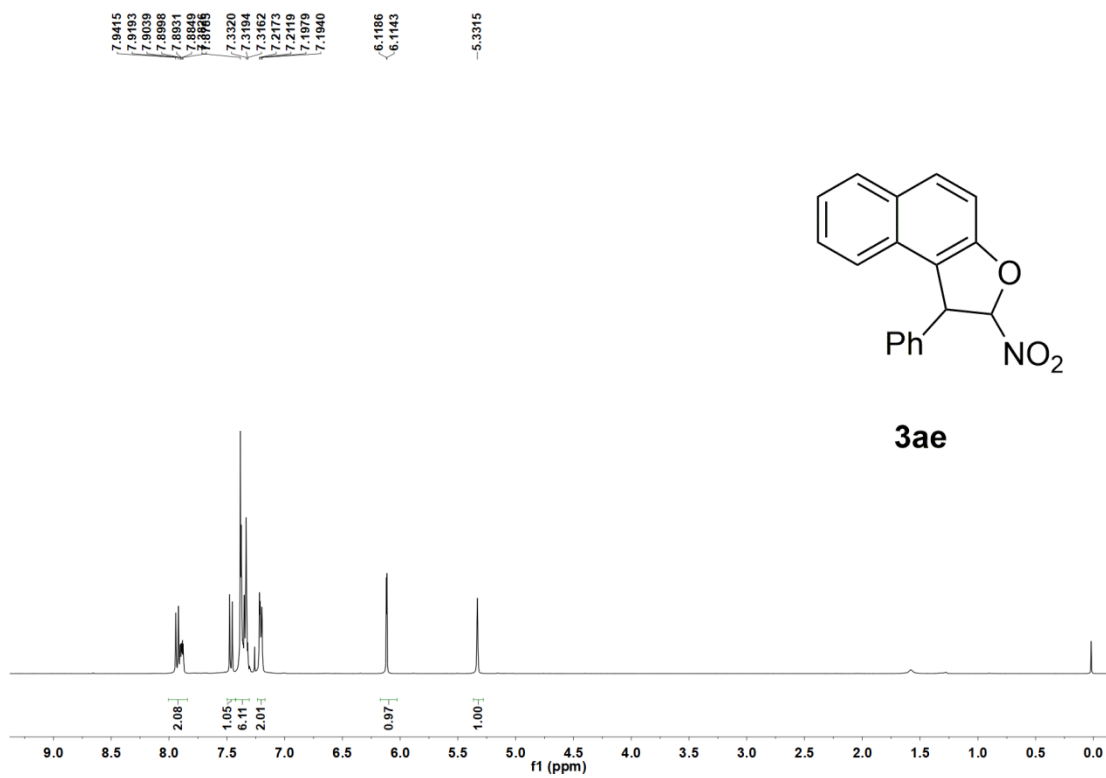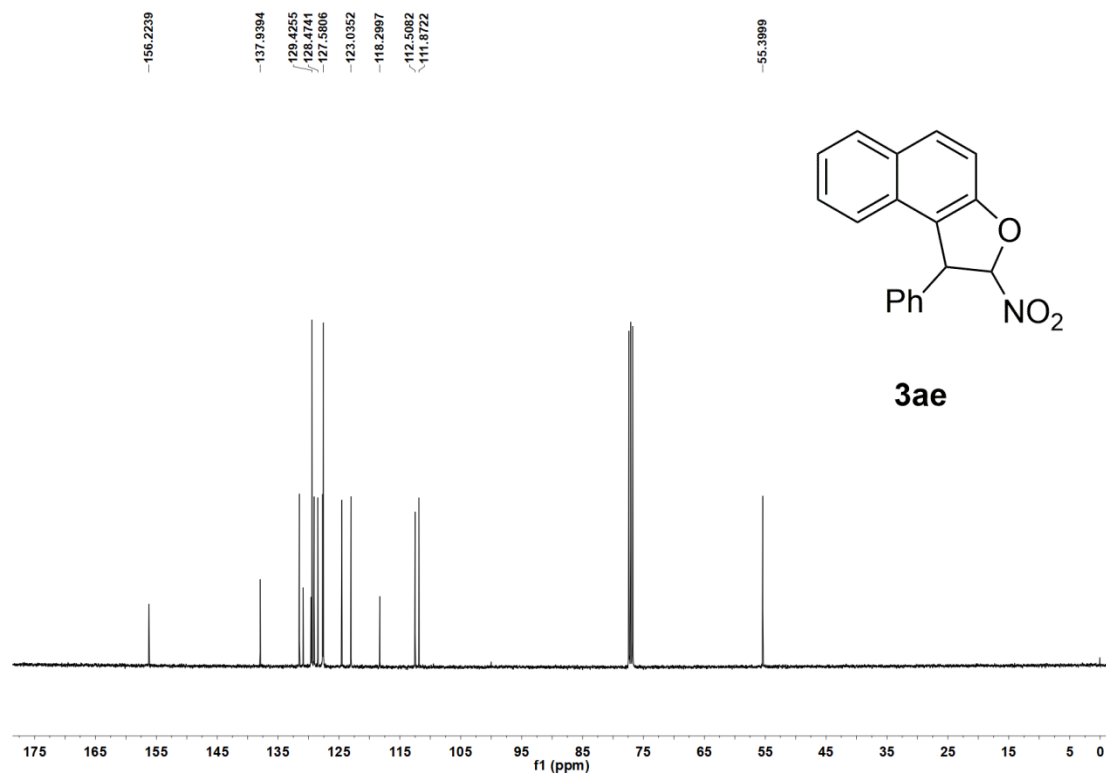

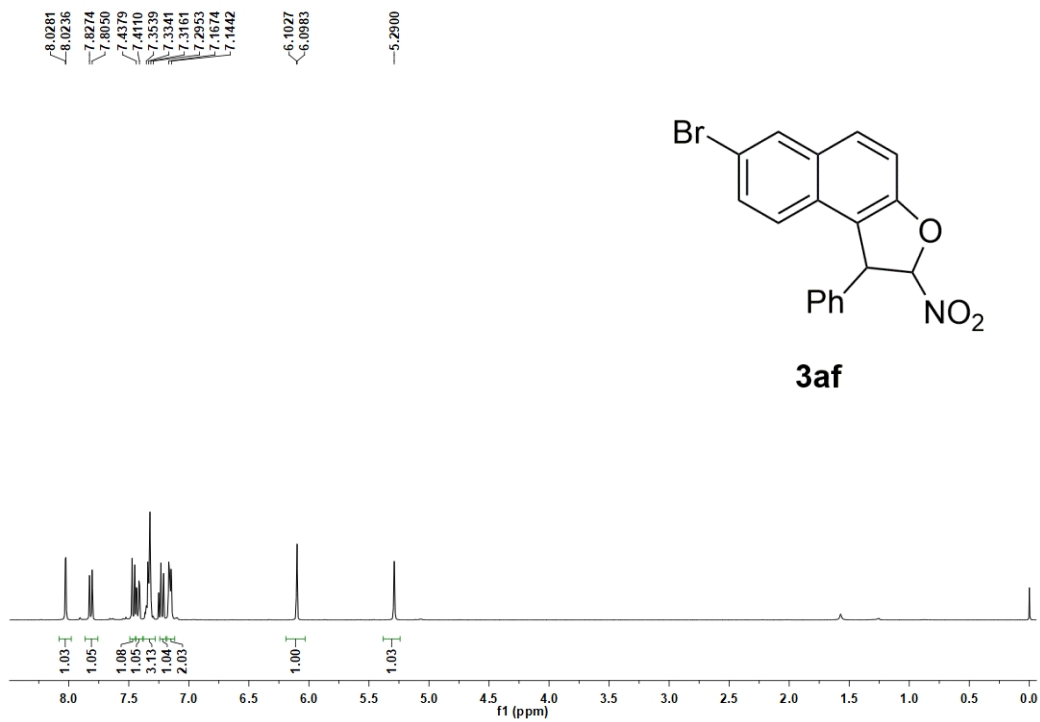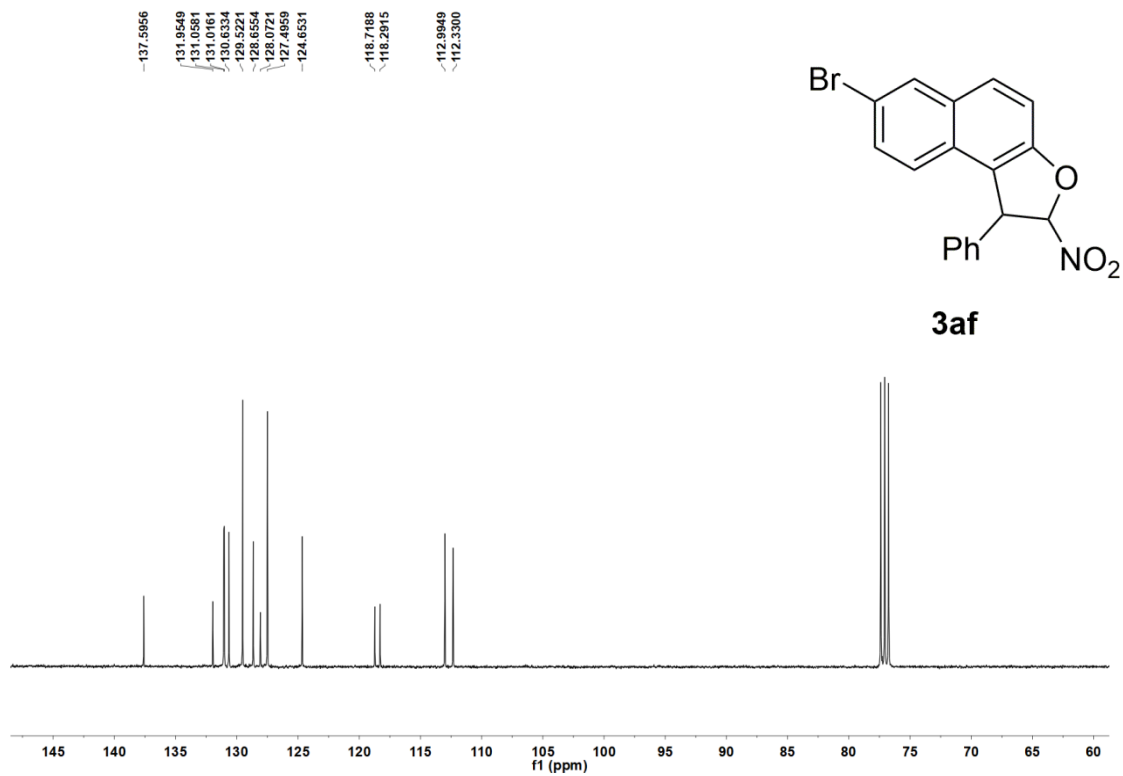

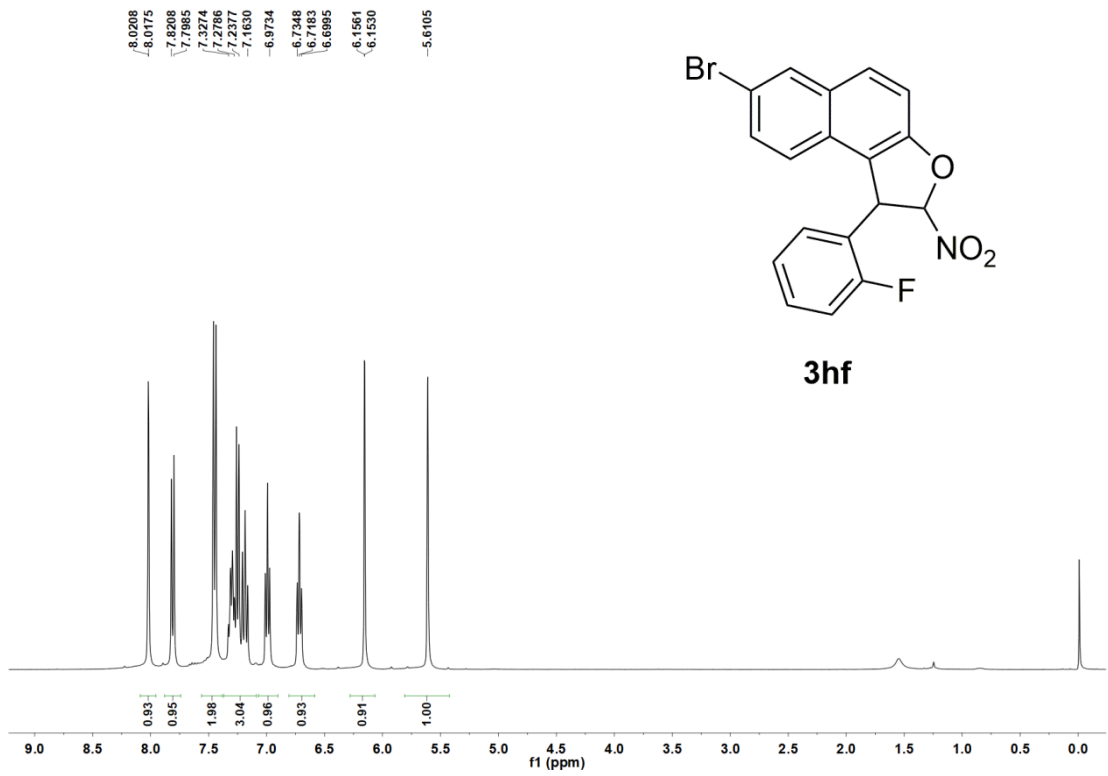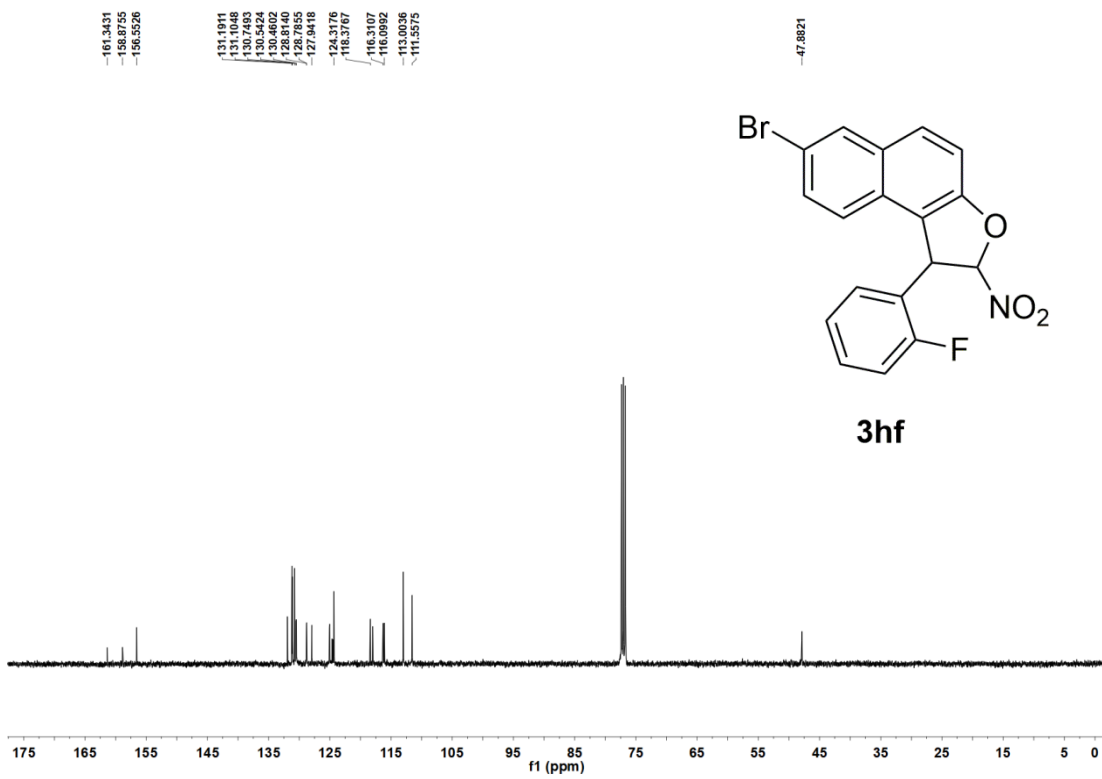

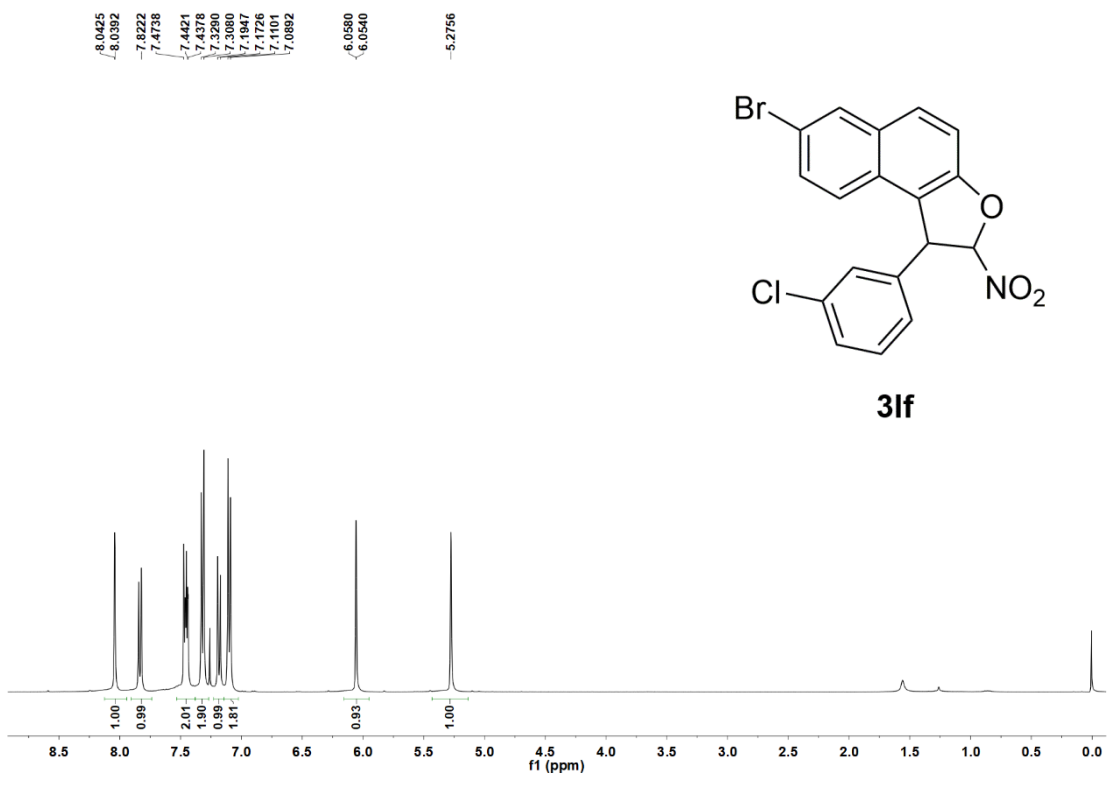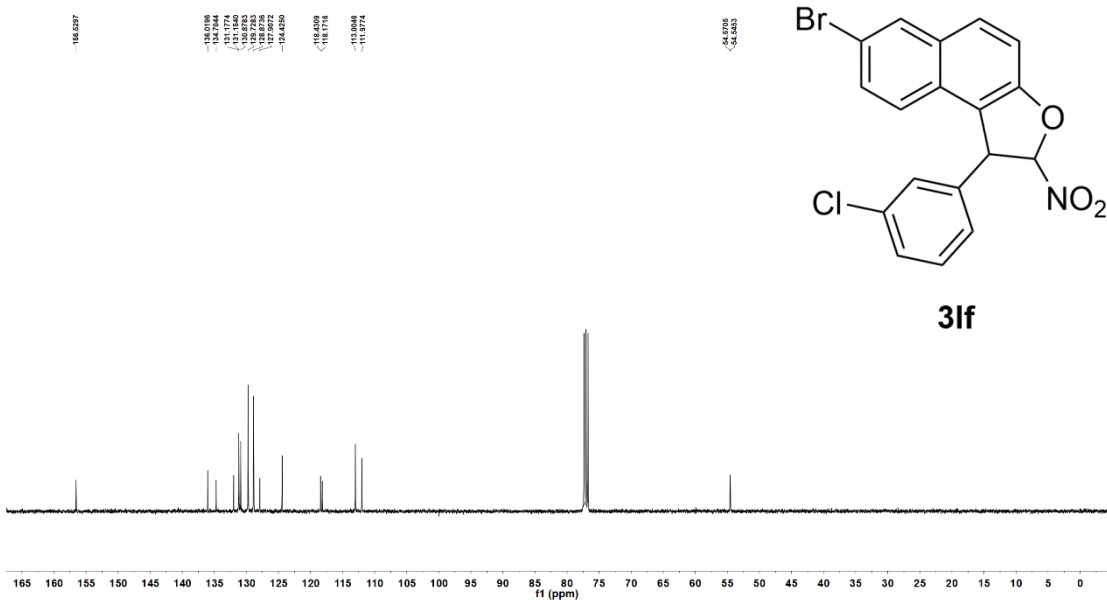

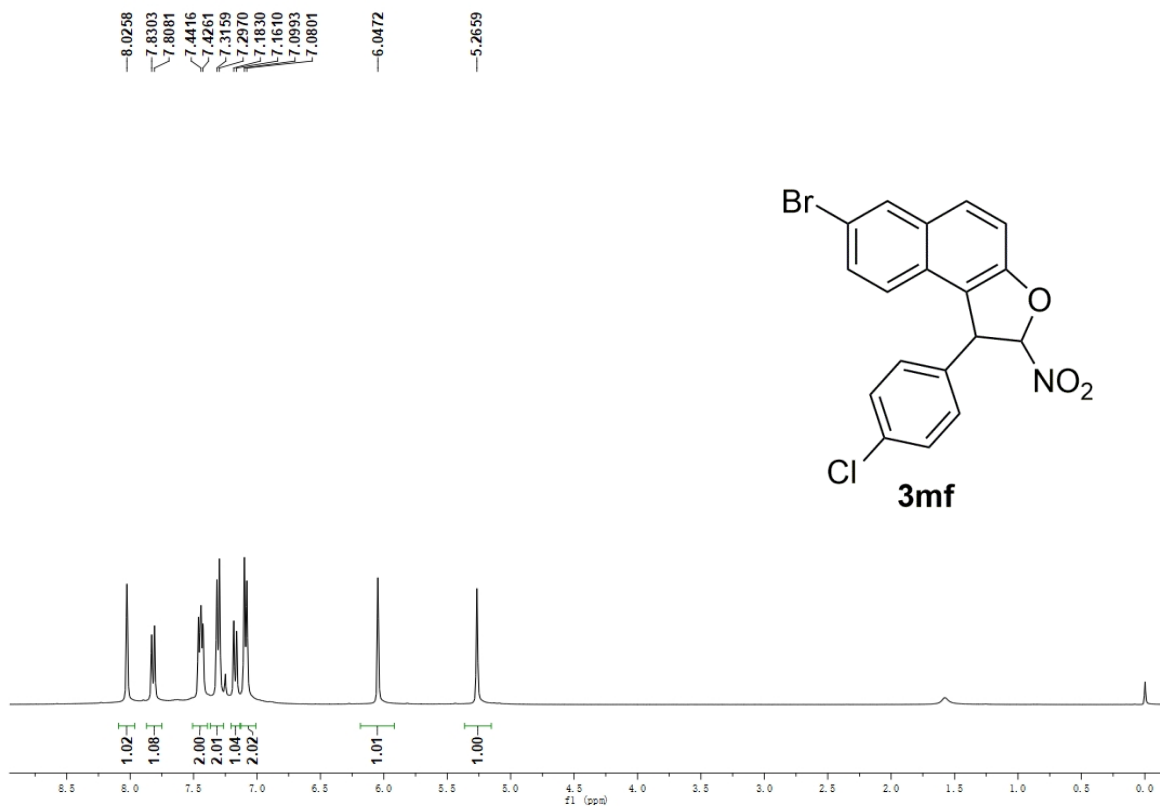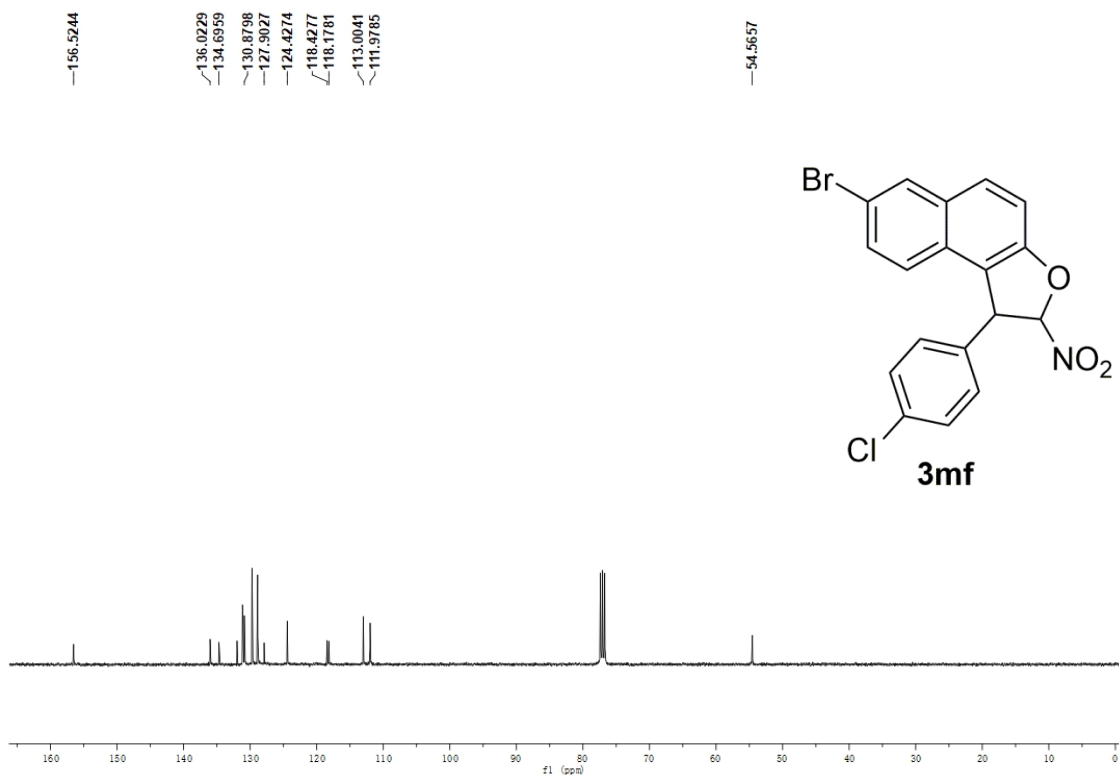

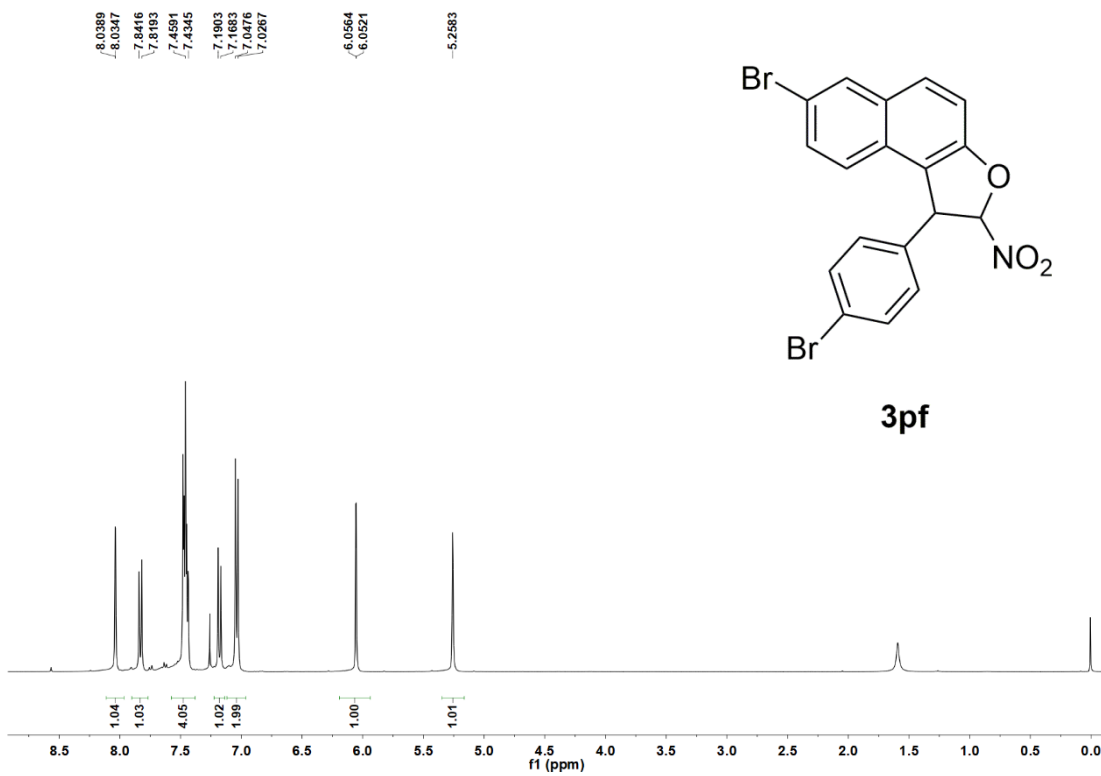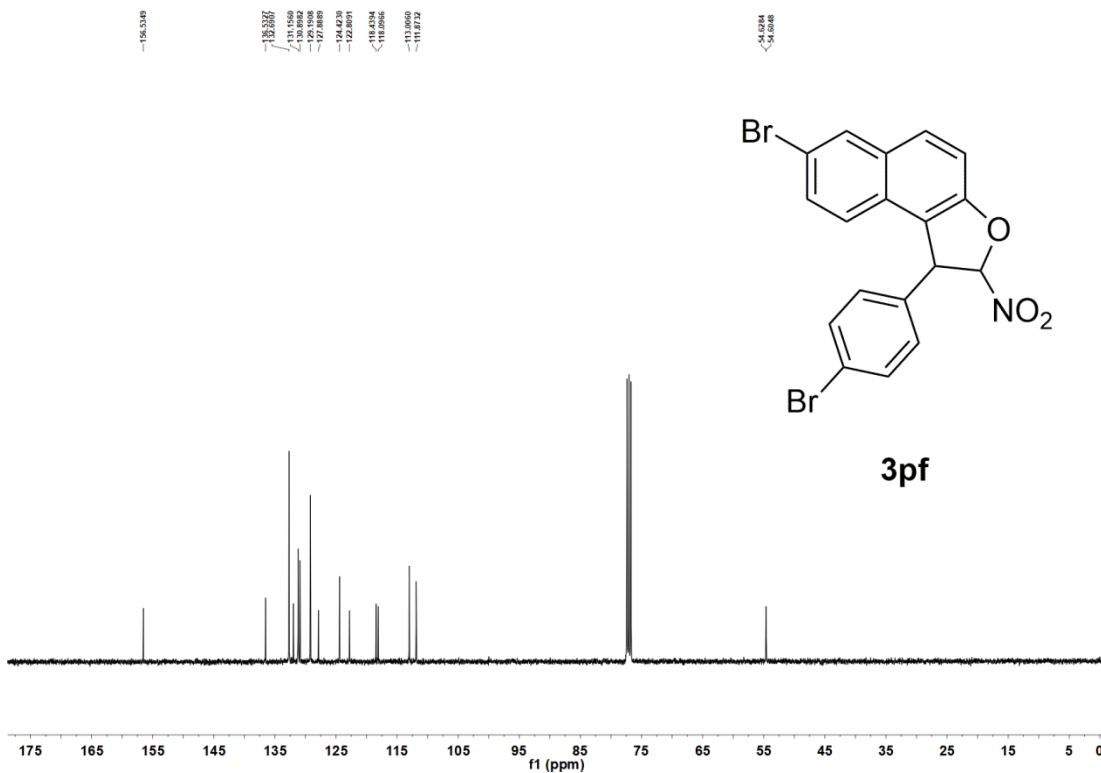

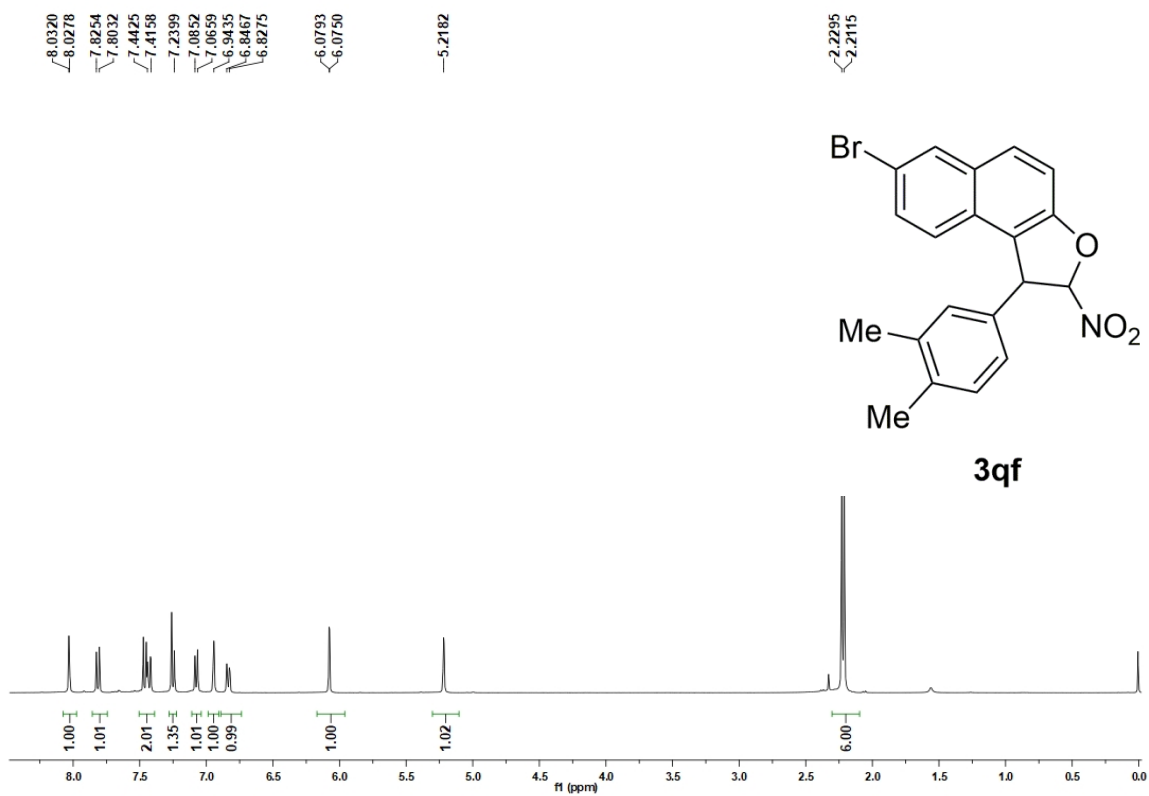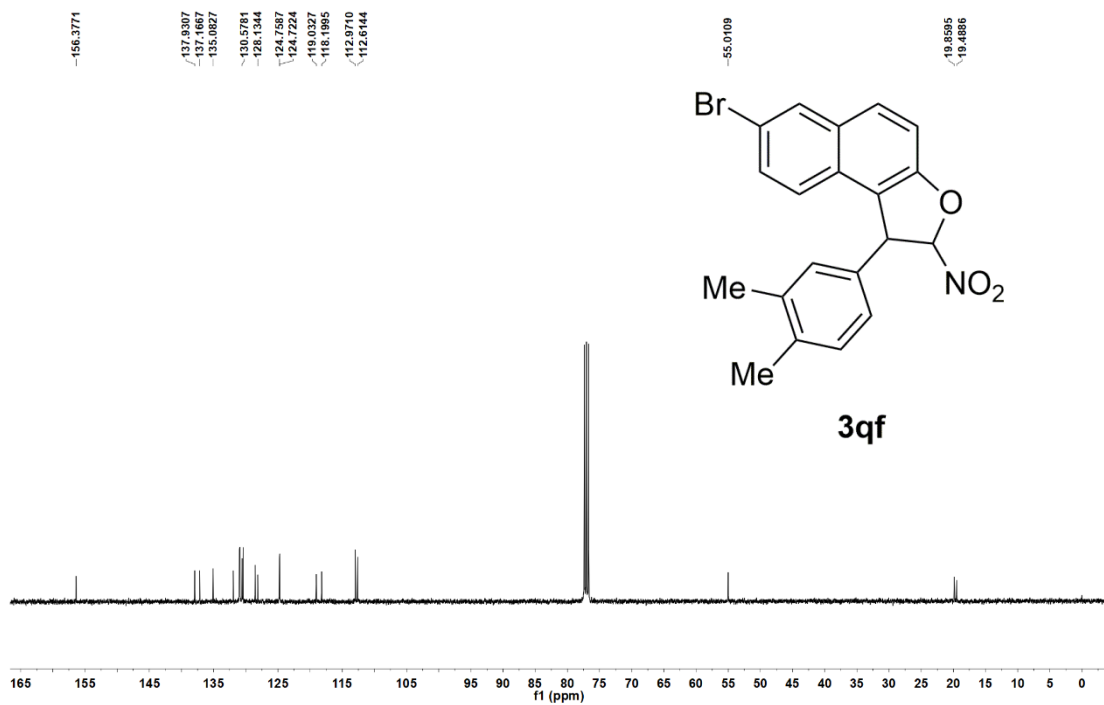



## 7. Synthetic Transformations

The synthetic utility of this method was briefly explored by the reduction of **3ma**. As shown in Scheme 3, the nitro group of **3ma** could be reduced to an amino group.

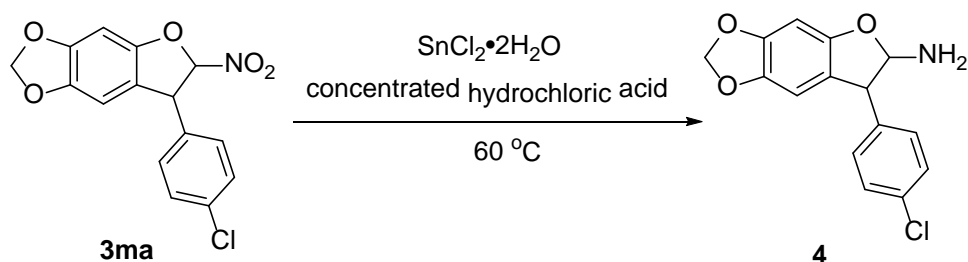

### Scheme 3. Synthetic transformations

In a 50 mL round-bottomed flask equipped with a magnetic stir bar, **3ma** (0.32 g, 1.0 mmol),  $\text{SnCl}_2 \cdot 2\text{H}_2\text{O}$  (1.13 g, 5.0 mmol) and concentrated hydrochloric acid (10 mL) were added. Then, the reaction was refluxed and stirred for 24 hours at  $60\text{ }^\circ\text{C}$ . The product was isolated by silica column chromatography using a mixture of PE/EA = 20/1, the yield was 50%.

$^1\text{H}$  NMR (400 MHz,  $\text{CDCl}_3$ )  $\delta$  = 12.51 (br, 1H), 7.55 (d,  $J=8.3$ , 2H), 7.23 (d,  $J = 8.3$  Hz, 2H), 6.52 (s, 1H), 6.08 (s, 1H), 5.85 (s, 2H), 5.12 (br, 2H).  $^{13}\text{C}$  NMR (101 MHz,  $\text{CDCl}_3$ )  $\delta$  = 155.40, 153.26, 148.66, 139.93, 135.72, 130.08, 129.89, 129.43, 111.90, 107.43, 101.18, 98.78, 29.72. MS (ESI<sup>+</sup>): calcd. for  $\text{C}_{15}\text{H}_{12}^{34,9689}\text{ClNO}_3$ :  $[\text{M}+\text{H}]^+$ : 290.0578, found 290.0582.

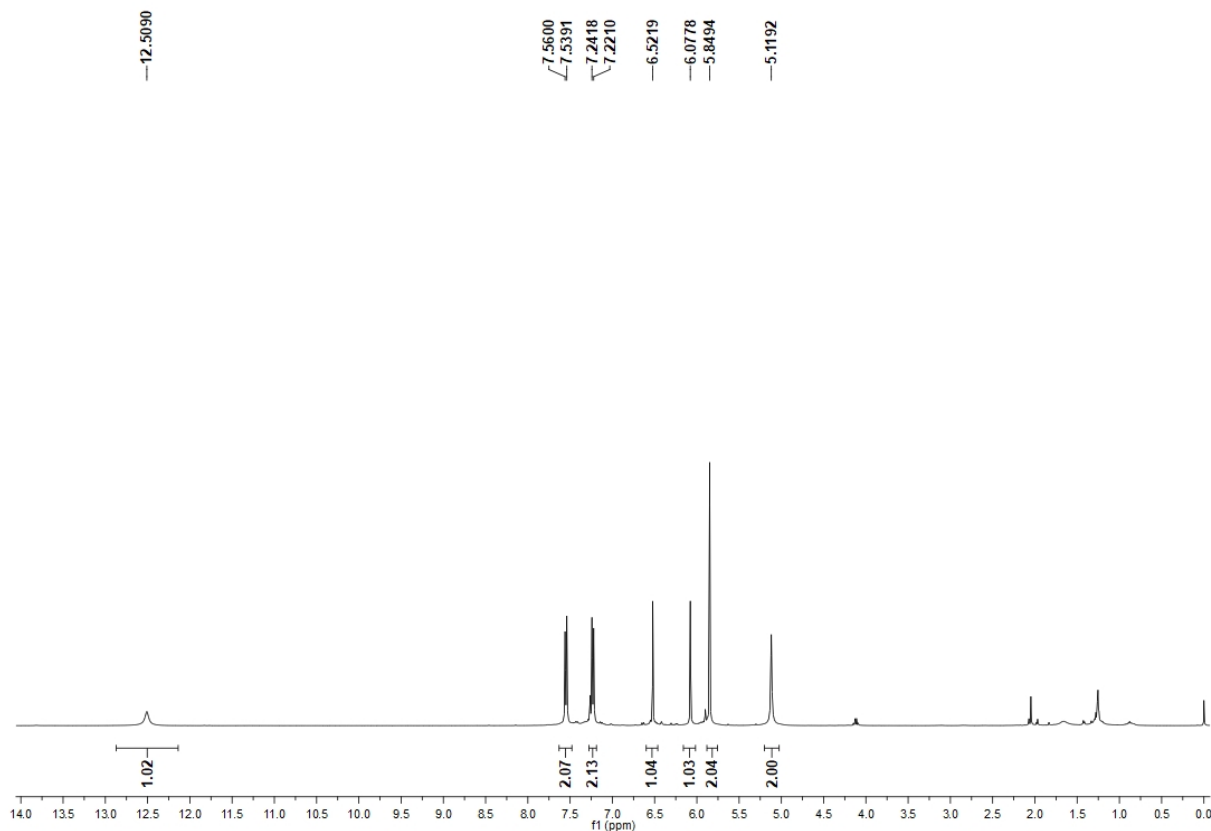

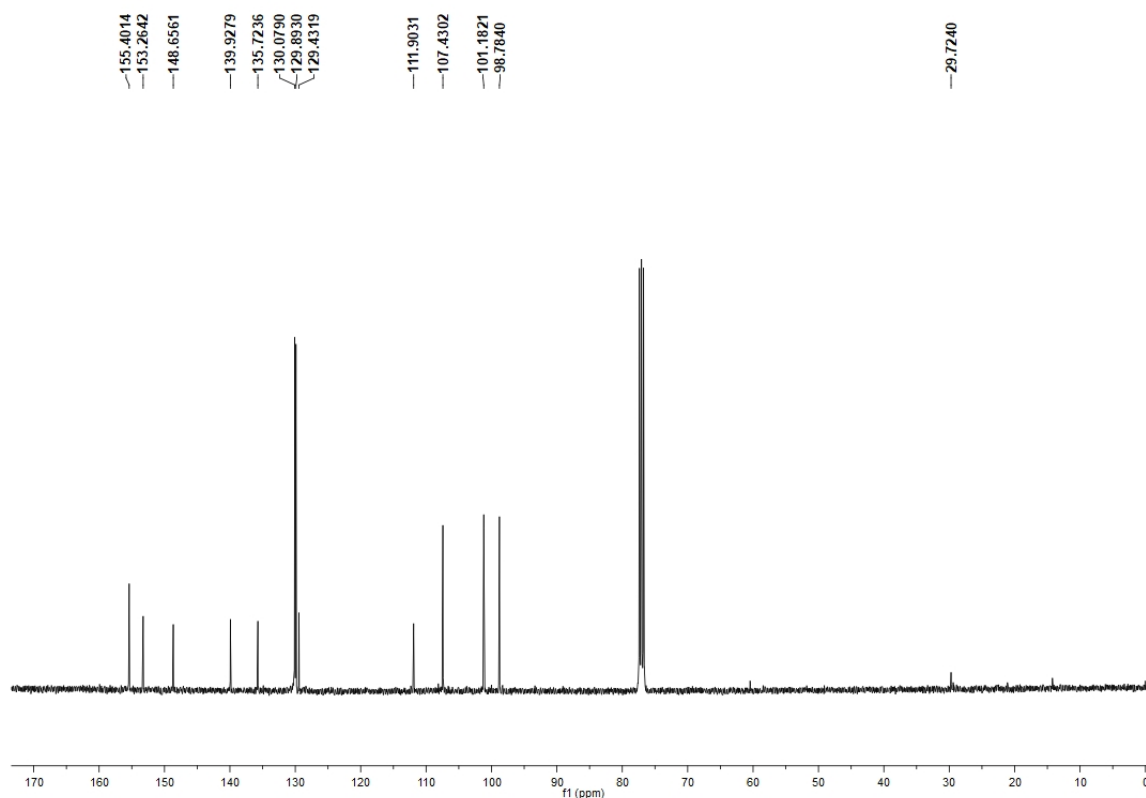

## 8. Synthetic Approach

The synthetic approach to *trans*-3-aryl-2-nitro-2,3-dihydrobenzofurans could be described as follow.

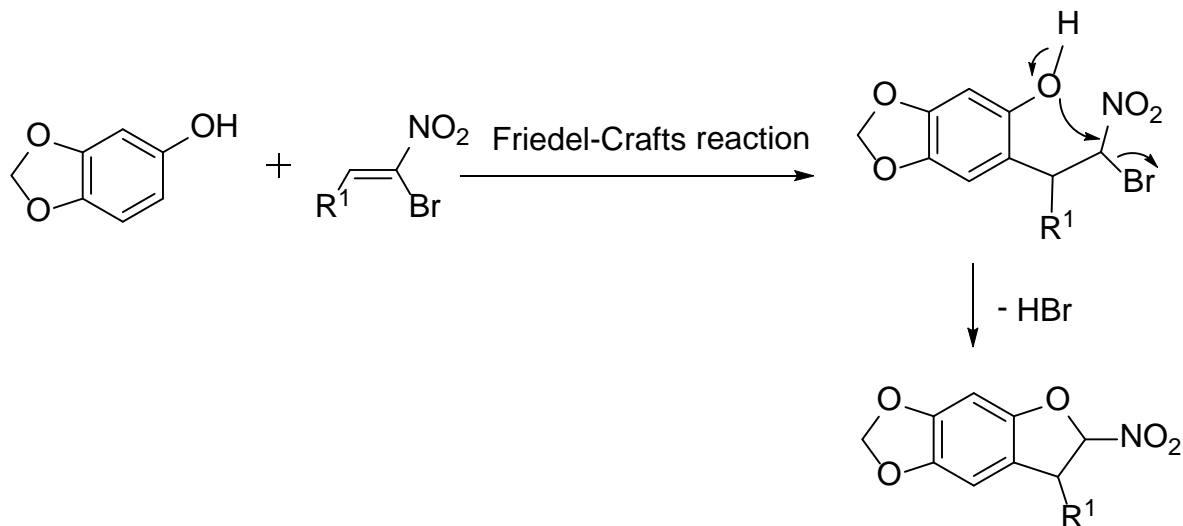

**Scheme 4.** Synthetic approach

## 9. Reference

[1] a) W. E. Parham, J. L. Bleasdale, *J. Am. Chem. Soc.* **1951**, *73*, 4664-4666; b) J. G. Greger, S. J. P. Yoon-Miller, N. R. Bechtold, S. A. Flewelling, J. P. MacDonald, C. R. Downey, E. A. Cohen, E. T. Pelkey *J. Org. Chem.* **2011**, *76*, 8203-8214.
